# Supplementary material for: Unsymmetrical Heptamethine Dyes for NIR Dye-Sensitized Solar Cells
Source: Hindawi journal article supplement (doi:10.1155/2014/258984), 2014-01-01
Supplement: f1 [file 258984.f1.pdf]

## Supplementary Data

### Unsymmetrical Heptamethine Dyes for NIR Dye-Sensitized Solar Cells

Thomas Geiger\*, Iuliia Schoger\*, Daniel Rentsch\*, Anna Christina Véron\*, Frédéric Oswald\*\*, Toby Meyer\*\*, Frank Nüesch\*<sup>†</sup>

\*Empa, Swiss Federal Laboratories for Materials Science and Technology, Laboratory for Functional Polymers, Überlandstrasse 129, CH-8600 Dübendorf, Switzerland; \*\*Solaronix, Rue de l'Ouriette 129, CH-1170 Aubonne VD, Switzerland; <sup>†</sup>Institut des Matériaux, Ecole Polytechnique Fédéral de Lausanne, EPFL Station 12, CH-1015 Lausanne, Switzerland.

## 1 Synthesis

### 1.2 General information

Heterocycles **S1-S5** were prepared according to literature procedures<sup>1</sup>. Middle synthon **S6** was purchased from FEW Chemicals GmbH and ORGANICA Feinchemie GmbH Wolfen. Compound **S7** was prepared following the synthetic route published elsewhere<sup>2</sup>. Synthesis procedure for the anchor group **S8** is described in literature<sup>3</sup> (Figure S1). Symmetric heptamethine dyes (**symHepta1-3**) were synthesized according to known literature procedures.

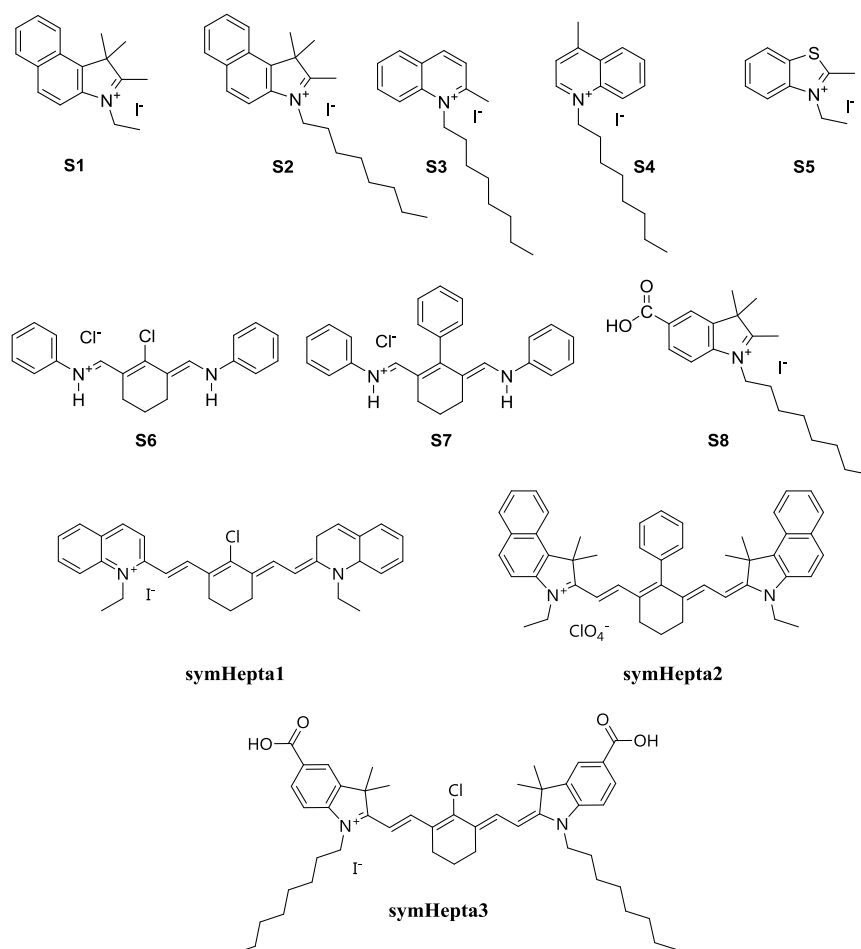

**Figure S1** Used compounds and dyes

(1) Pardal, A. C.; Ramos, S. S.; Santos, P. F.; Reis, L. V., Almeida, P. *Molecules*, **2002**, 7, 320

(2) Salon, J.; Wolińska, E.; Raszkievicz, A.; Patonay, G.; Strekowski, L. J. *Heterocyclic. Chem.*, **2005**, 42, 959

(3) Yum, J. H.; Walter, P.; Huber, S.; Rentsch, D.; Geiger, T.; Nüesch, F.; De Angelis, F.; Grätzel, M.; Nazeeruddin, M. K. *J. Am. Chem. Soc.*, **2007**, 129, 10320

## 1.2 Methyl 2-methylquinoline-6-carboxylate (**S9**)<sup>4</sup>

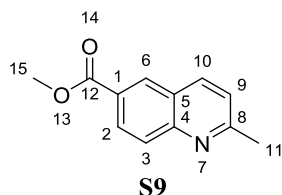

2-Methylquinoline-6-carboxylic acid (22.7 g, 0.1 mol) and concentrated sulfuric acid (98%, 9 ml) were mixed in methanol (150 ml) and refluxed for 24 h. After the reaction, the mixture was cooled down to room temperature and poured into ice cold water (500 ml), stirred for 20 min and filtered. The obtained solution was neutralized with saturated NaHCO<sub>3</sub> solution (200 ml) and a precipitate formed. The suspension was stored at 4 °C for 12 hours and filtered. The white product was washed with water twice (50 ml each) and dried at 40 °C under reduced pressure for 12 h to yield pure methyl 2-methylquinoline-6-carboxylate **S9** (13.39 g, 69.2). m.p. 103 °C. <sup>1</sup>H NMR (DMSO-d<sub>6</sub>, 400.1 MHz): δ 8.62 (d, *J* = 2.0, 1H), 8.44 (d, *J* = 8.5, 1H), 8.15 (dd, *J* = 8.8, 2.0, 1H), 7.99 (d, *J* = 8.8, 1H), 7.51 (d, *J* = 8.5, 1H), 3.91 (s, 3H), 2.68 (s, 3H). <sup>13</sup>C NMR (DMSO-d<sub>6</sub>, 100.6 MHz, ppm): δ 165.9, 161.7, 149.1, 137.5, 130.7, 128.7, 128.4, 126.5, 125.5, 123.1, 52.3, 25.1. IR (ATR, cm<sup>-1</sup>): λ<sub>max</sub> 3028, 3000, 2953, 1705, 1439, 1275, 815, 790, 753, 639.

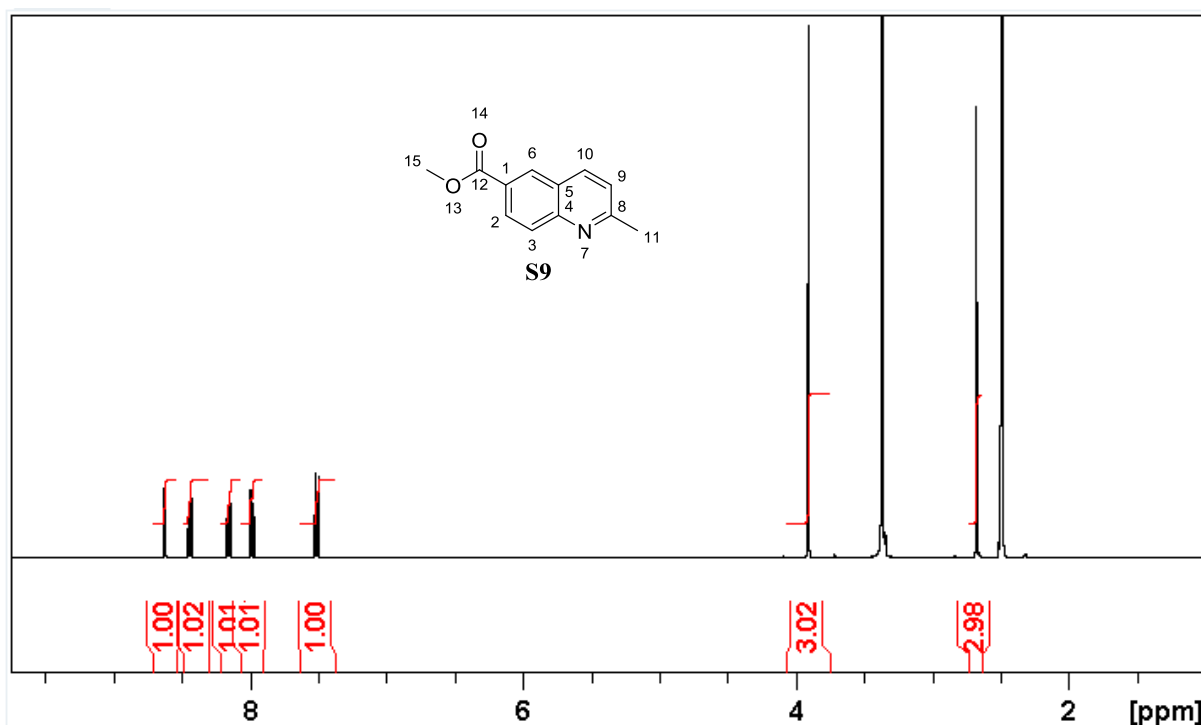

<sup>4</sup> Bottino, F. A.; Pasquale, G. D.; Pollicino, A.; Recca, A.; Staniland, P. A. *J. Heterocycl. Chem.* **1989**, 26, 929

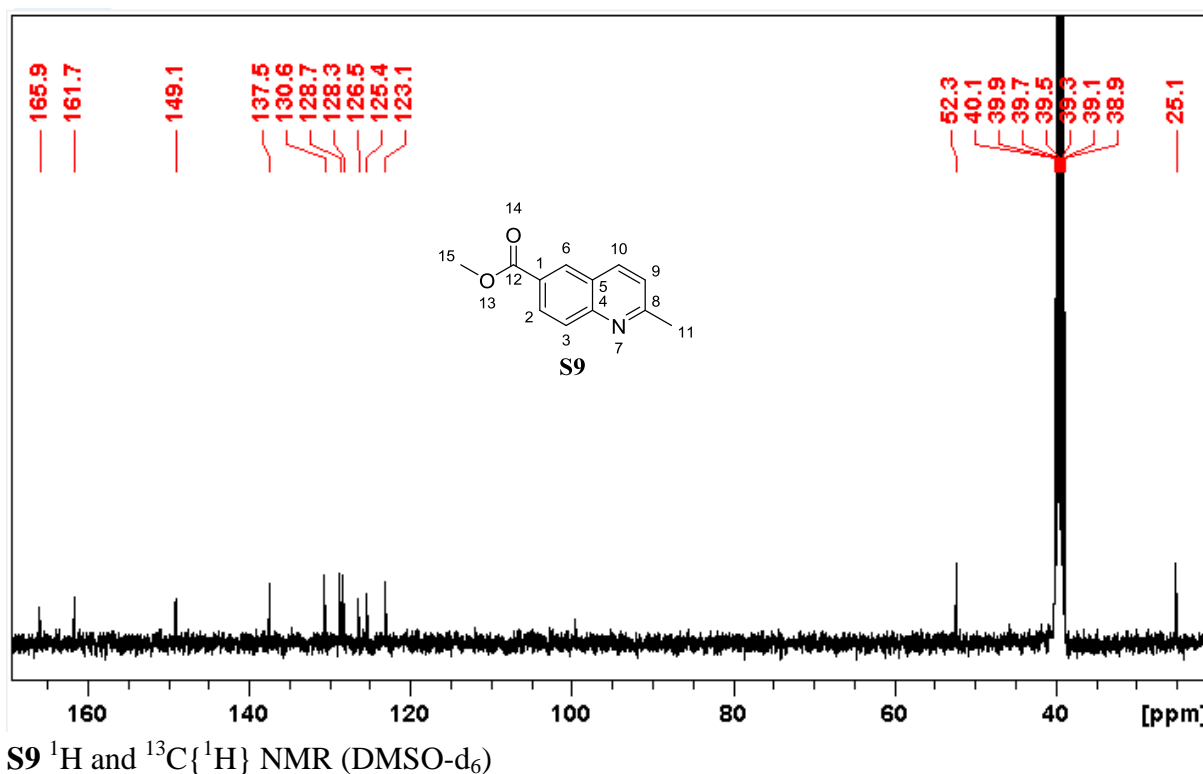

### 1.3 6-Carboxy-1-ethyl-2-methylquinolin-1-ium bromide (**S10**)

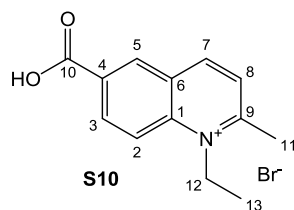

Methyl 2-methylquinoline-6-carboxylate **S9** (0.118 mol, 23.8 g) and ethyl *p*-toluene sulfonate (0.19 mol, 38.0 g) were combined in a dry flask and degassed by three cycles of vacuum pumping and argon ventilation. The reactants were heated to 140 °C under argon for 18 h. The melt was cooled to room temperature. Subsequently, the partially crystalline suspension was dissolved in chloroform (350 ml) and extracted with water four times (4 x 50 ml). The combined water phase was washed with chloroform (8 x 50 ml) in order to remove pink-colored impurities. Then, the water was completely removed by distillation under reduced pressure. For the ester cleavage, the light orange and highly viscous residue was dissolved in aqueous HBr (48 %, 30 ml) and heated to 140 °C for 2 h. Then, the aqueous HBr was completely removed by distillation under reduced pressure yielding an amorphous solid after 2 h. For further purification, the solid was dissolved in hot ethanol (80 ml) and stored at 0 °C for 24 h. The precipitated light pink-coloured crystals **S10** were isolated by filtration, washed with ethanol thrice (30 ml) and dried under reduced pressure at 40 °C (12.3 g, 35 %). m.p. 256 °C. d.p. 283 °C.  $^1\text{H}$  NMR (DMSO- $d_6$ , 400.1 MHz):  $\delta$  13.80 (br, 1H, OH), 9.27 (d,  $J$  = 8.6, 1H, H-7), 8.97 (d,  $J$  = 2.0, 1H, H-5), 8.72 (d,  $J$  = 9.3, 1H, H-2), 8.53 (dd,  $J$  = 9.3, 2.0, 1H, H-3), 8.23 (d,  $J$  = 8.6, 1H, H-8), 5.02 (q,  $J$  = 7.3, 2H, H-12), 3.15 (s, 3H, H-11), 1.53 (t,  $J$  = 7.3, 3H, H-13).  $^{13}\text{C}$  NMR (DMSO- $d_6$ , 100.6 MHz):  $\delta$  165.6 (s, C-10), 162.6 (s, C-9), 146.6 (d, C-7), 139.9 (s, C-1), 134.0 (d, C-3), 132.4 (d, C-5), 130.6 (s, C-4), 128.0 (s, C-6), 126.4 (d, C-8), 119.7 (d, C-2), 47.6 (t, C-12), 22.6 (q, C-11), 13.4 (q, C-13). HMBC correlations: H-2  $\rightarrow$  C-(4, 6), H-3  $\rightarrow$  C-(1, 5, 10), H-5  $\rightarrow$  C-(1, 3, 7, 10), H-7  $\rightarrow$  C-(1, 5, 9), H-8  $\rightarrow$  C-(6, 9, 11), H-11  $\rightarrow$  C-(8, 9), H-12  $\rightarrow$  C-(1, 9, 13). HR-MS(ESI-QTOF): calculated for  $\text{C}_{13}\text{H}_{14}\text{NO}_2$  [ $\text{M}-\text{Br}$ ] $^+$ : 216.1019. Found: 216.1018. Elemental analysis: calculated for  $\text{C}_{13}\text{H}_{14}\text{NO}_2\text{Br}$ : C, 52.72

%; H, 4.76 %; N, 4.73 %; O, 10.80%; Br, 26.98 %. Found: C, 52.56 %; H, 4.81 %; N, 4.75 %; O, 10.97 %; Br, 26.87 %. IR (ATR,  $\text{cm}^{-1}$ ):  $\lambda_{\text{max}}$  3034, 2754, 1701, 1599, 1374, 1245, 1192, 1163, 828, 774.

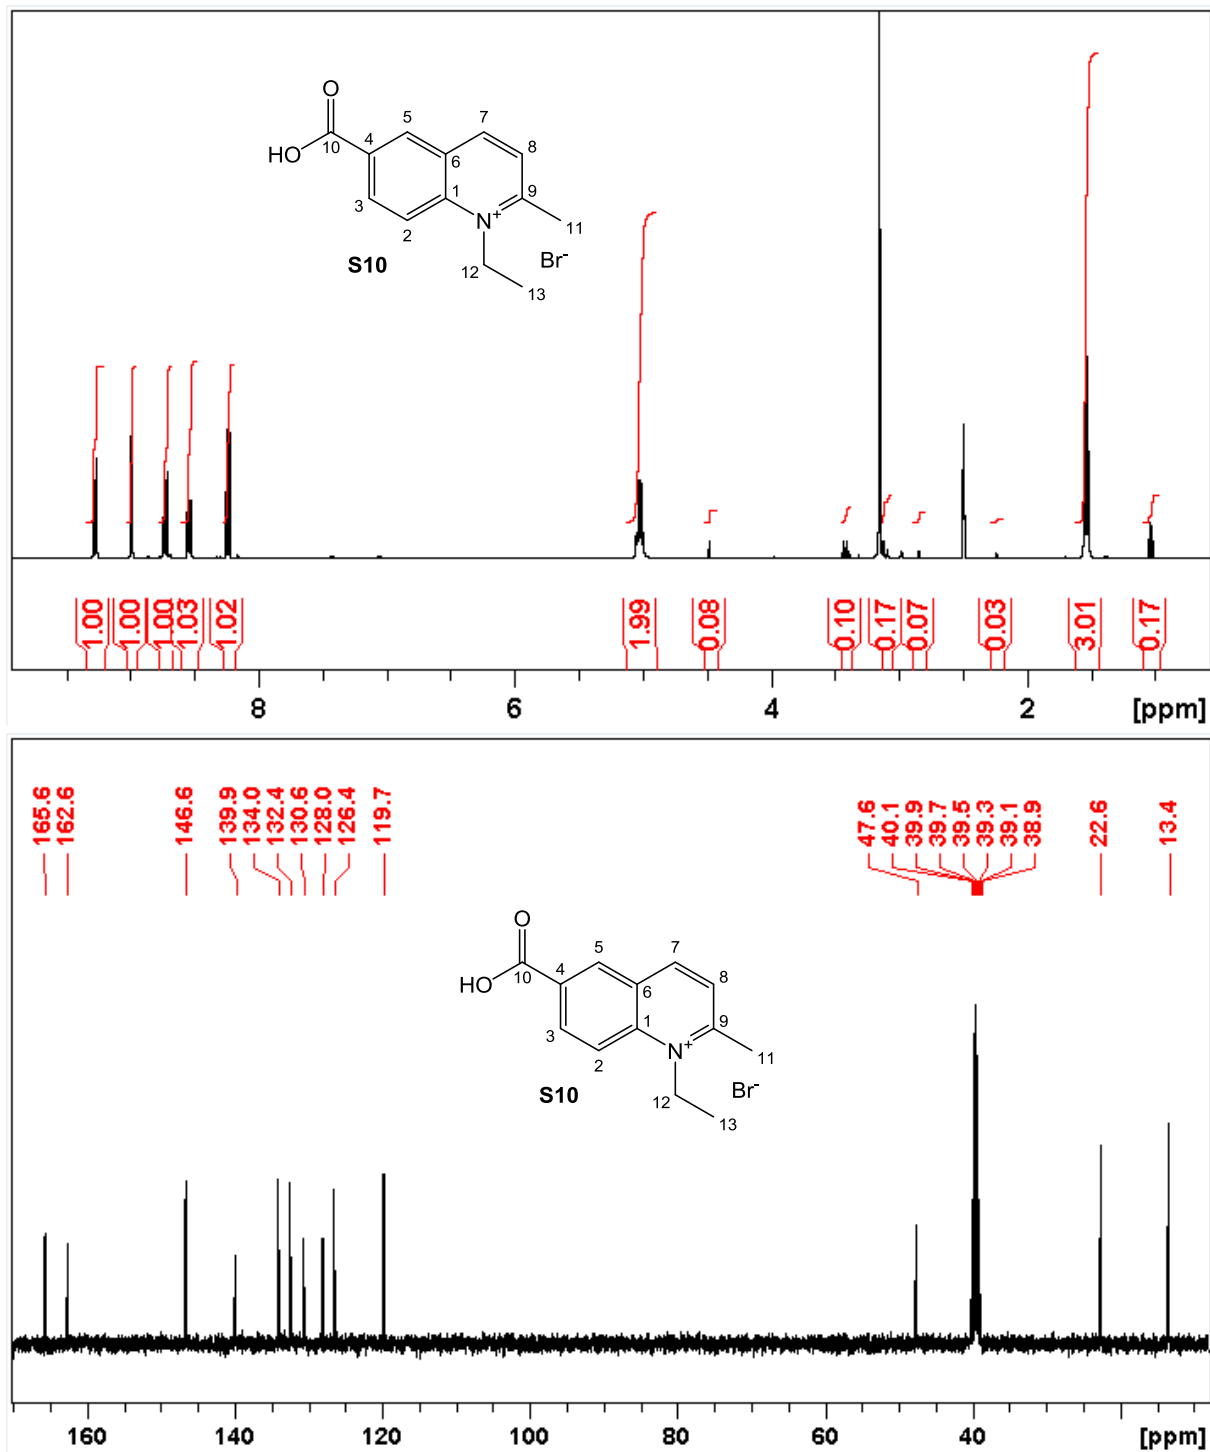

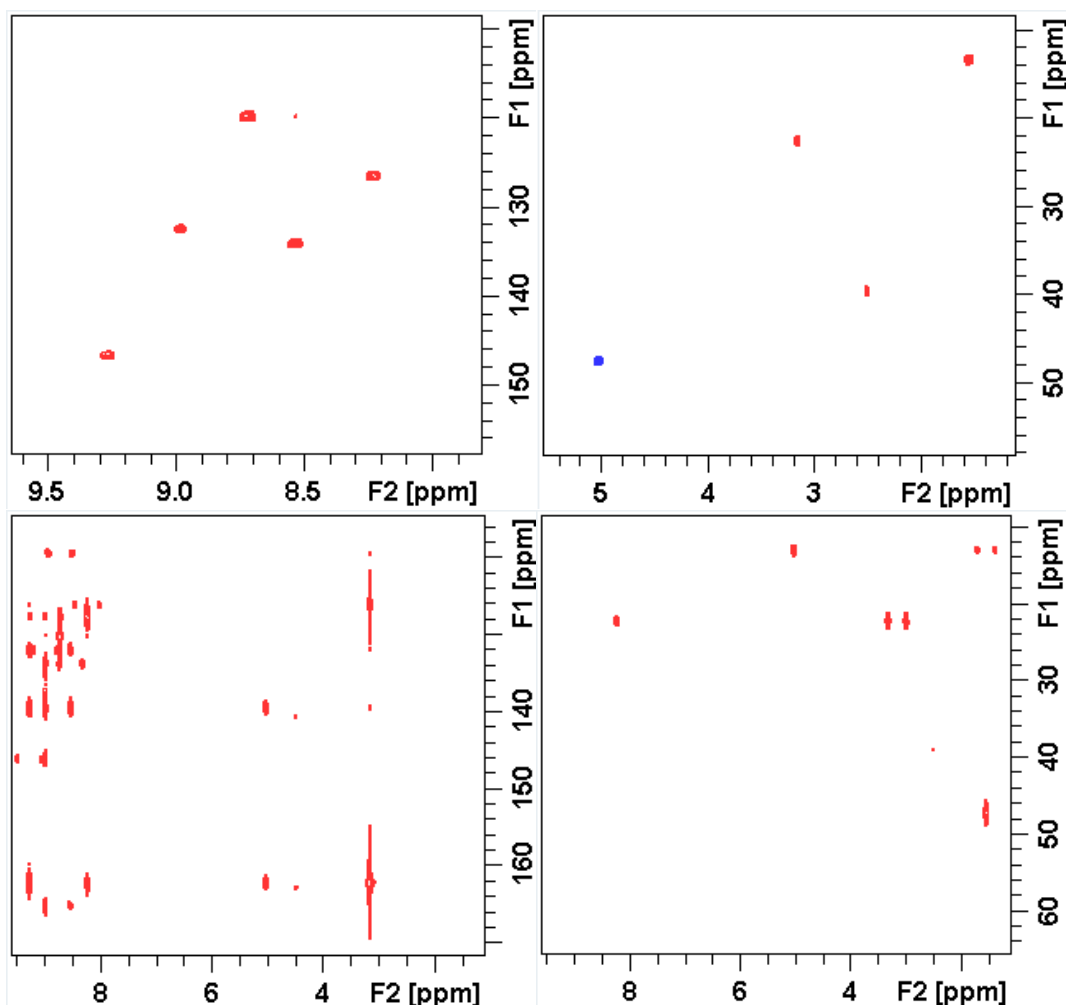

**S10**  $^1\text{H}$ ,  $^{13}\text{C}\{^1\text{H}\}$ , HSQC and HMBC NMR ( $\text{DMSO-d}_6$ )

**1.4 2-(2-(2-Chloro-3-((phenylamino)methylene)cyclohex-1-en-1-yl)vinyl)-3-ethyl-1,1-dimethyl-1*H*-benzo[*e*]indol-3-ium iodide (S11)**

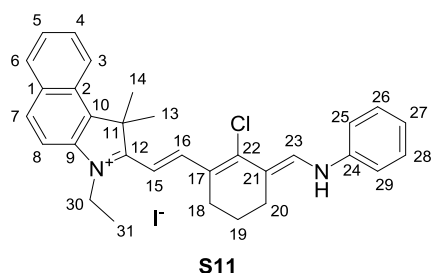

A solution of 3-ethyl-1,1,2-trimethyl-1*H*-benzo[*e*]indol-3-ium iodide **S1** (20 mmol, 7.3 g) and *N*-((2-chloro-3-((phenylimino)methyl)cyclohex-2-en-1-ylidene)methyl)aniline hydrochloride **S6** (22 mmol, 7.9 g) in anhydrous ethanol (160 ml) were stirred at 80 °C for 20 h. After the reaction, the solution was cooled to 4 °C and unreacted starting material was removed. The filtrate was stored at 4 °C for 12 h. Finally, the product was collected by filtration. For further purification, the residue was washed with cold ethanol three times (30 ml) and dried under reduced pressure at 40 °C to yield shiny green crystals **S11** (4.05 g, 36%). m.p. 227 °C. d.p. 240 °C.  $^1\text{H}$  NMR ( $\text{DMSO-d}_6$ , 400.1 MHz):  $\delta$  10.13 (br, 1H, NH), 8.54 (d,  $J$  = 14.8, 1H, H-16), 8.35 (d,  $J$  = 8.2, 1H, H-3), 8.18 (d,  $J$  = 8.8, 1H, H-7), 8.17 (d,  $J$  = 14.7, 1H, H-23), 8.12 (d,  $J$  = 8.9, 1H, H-6), 7.92 (d,  $J$  = 8.8, 1H, H-8), 7.71 (m, 1H, H-4), 7.61 (m, 1H, H-5), 7.41 (m, 2H,

H-26, 28), 7.41 (m, 2H, H-25, 29), 7.15 (m, 1H, H-27), 6.59 (d,  $J = 14.8$ , 1H, H-15), 4.53 (q,  $J = 7.1$ , 2H, H-35), 2.74 (t,  $J = 6.1$ , 2H, H-18), 2.69 (t,  $J = 6$ , 2H, H-20), 1.95 (s, 6H, H-13, 14), 1.87 (m, 2H, H-19), 1.41 (t,  $J = 7.1$ , 3H, H-36).  $^{13}\text{C}$  NMR (DMSO- $d_6$ , 100.6 MHz):  $\delta$  177.3 (s, C-12), 148.7 (s, C-22), 146.2 (d, C-16), 141.5 (d, C-23), 140.4 (s, C-24), 138.7 (s, C-9), 135.7 (s, C-10), 132.2 (s, C-1), 130.8 (d, C-7), 130.0 (d, C-6), 129.7 (d, C-26, 28), 128.1 (d, C-4), 127.1 (s, C-2), 126.0 (d, C-5), 125.1 (s, C-17), 124.4 (d, C-27), 122.6 (d, C-3), 117.3 (s, C-25, 29), 113.6 (s, C-21), 112.2 (d, C-8), 103.8 (d, C-15), 51.9 (s, C-11), 40.4 (t, C-35), 26.8 (q, C-13, 14), 25.4 (t, C-18), 24.9 (t, C-20), 20.0 (t, C-19), 12.9 (q, C-36). HMBC correlations: H-3  $\rightarrow$  C-(1, 2w, 5, 10), H-4  $\rightarrow$  C-(2, 6), H-5  $\rightarrow$  C-(1, 3), H-6  $\rightarrow$  C-(2, 4, 7), H-7  $\rightarrow$  C-(1w, 2, 6, 8w, 9), H-8  $\rightarrow$  C-(1, 10), H-13, 14  $\rightarrow$  C-(10, 11, 12, 13, 14), H-15  $\rightarrow$  C-(11, 17), H-16  $\rightarrow$  C-(12, 18, 22), H-18  $\rightarrow$  C-(16w, 17, 19, 20, 22), H-19  $\rightarrow$  C-(17, 21), H-20  $\rightarrow$  C-(18, 19, 21, 22, 23w), H-23  $\rightarrow$  C-(20, 22, 24), H-26, 28  $\rightarrow$  C-(24, 26, 28), H-27  $\rightarrow$  C-(25, 26, 28, 29), H-35  $\rightarrow$  C-(9, 12, 31), H-36  $\rightarrow$  C-(30). DQF-COSY correlations: H-3  $\rightarrow$  H-(4), H-4  $\rightarrow$  H-(3, 5), H-5  $\rightarrow$  H-(4, 6), H-6  $\rightarrow$  H-(5), H-7  $\rightarrow$  H-(8), H-8  $\rightarrow$  H-(7), H-15  $\rightarrow$  H-(16), H-16  $\rightarrow$  H-(15), H-18  $\rightarrow$  H-(19), H-19  $\rightarrow$  H-(18, 20), H-20  $\rightarrow$  H-(19), H-26, 28  $\rightarrow$  H-(27), H-27  $\rightarrow$  H-(26, 28), H-35  $\rightarrow$  H-(36), H-36  $\rightarrow$  H-(35). HR-MS(ESI-QTOF): calculated for  $\text{C}_{31}\text{H}_{32}\text{ClN}_2$  [M-I]: 467.2249. Found: 467.2254. Elemental Analysis: Calculated for  $\text{C}_{31}\text{H}_{32}\text{N}_2\text{ClI}$ : [C] 62.58 %; [H] 5.42 %; [N] 4.71 %; [Cl] 5.96 %, [I] 21.33 %. Found: [C] 61.79 %; [H] 5.50 %; [N] 4.69 %; [Cl] 5.90 %, [I] 20.85 %. IR (ATR,  $\text{cm}^{-1}$ ):  $\lambda_{\text{max}}$  3197, 2957, 2872, 2324, 1708, 1547, 1430, 1350, 1233, 1122, 738. UV-Vis:  $\lambda_{\text{max}}$  669.0 nm (in ethanol).

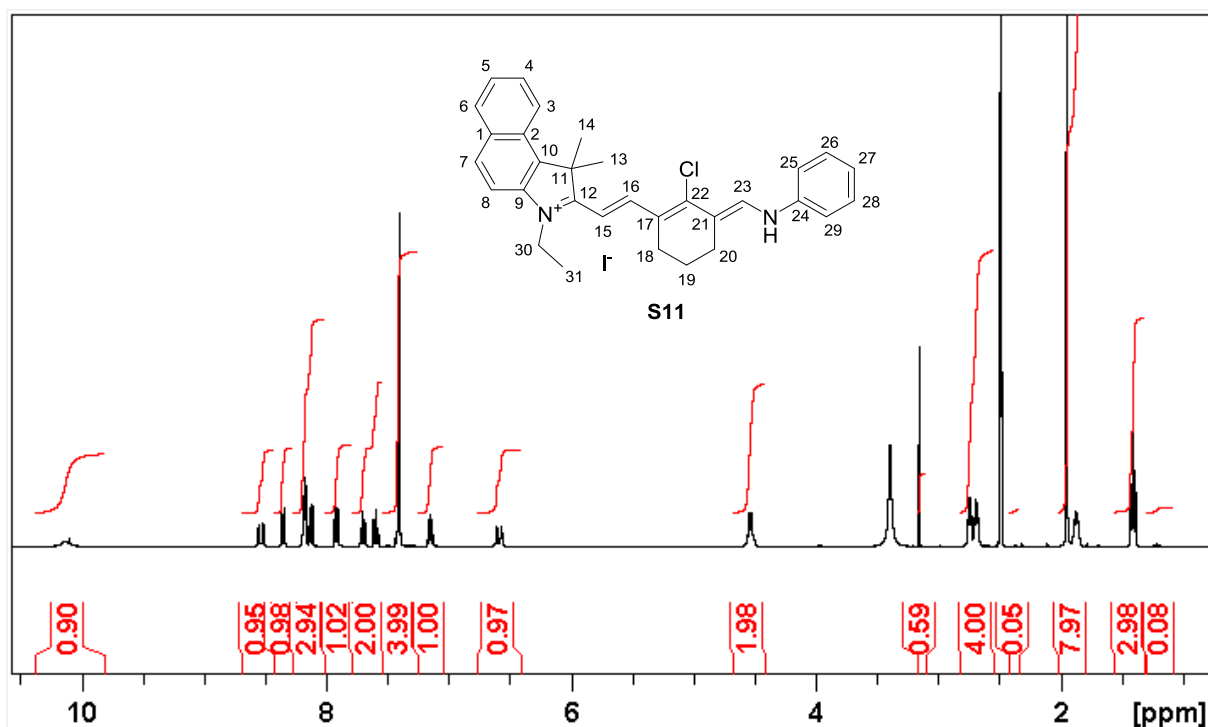

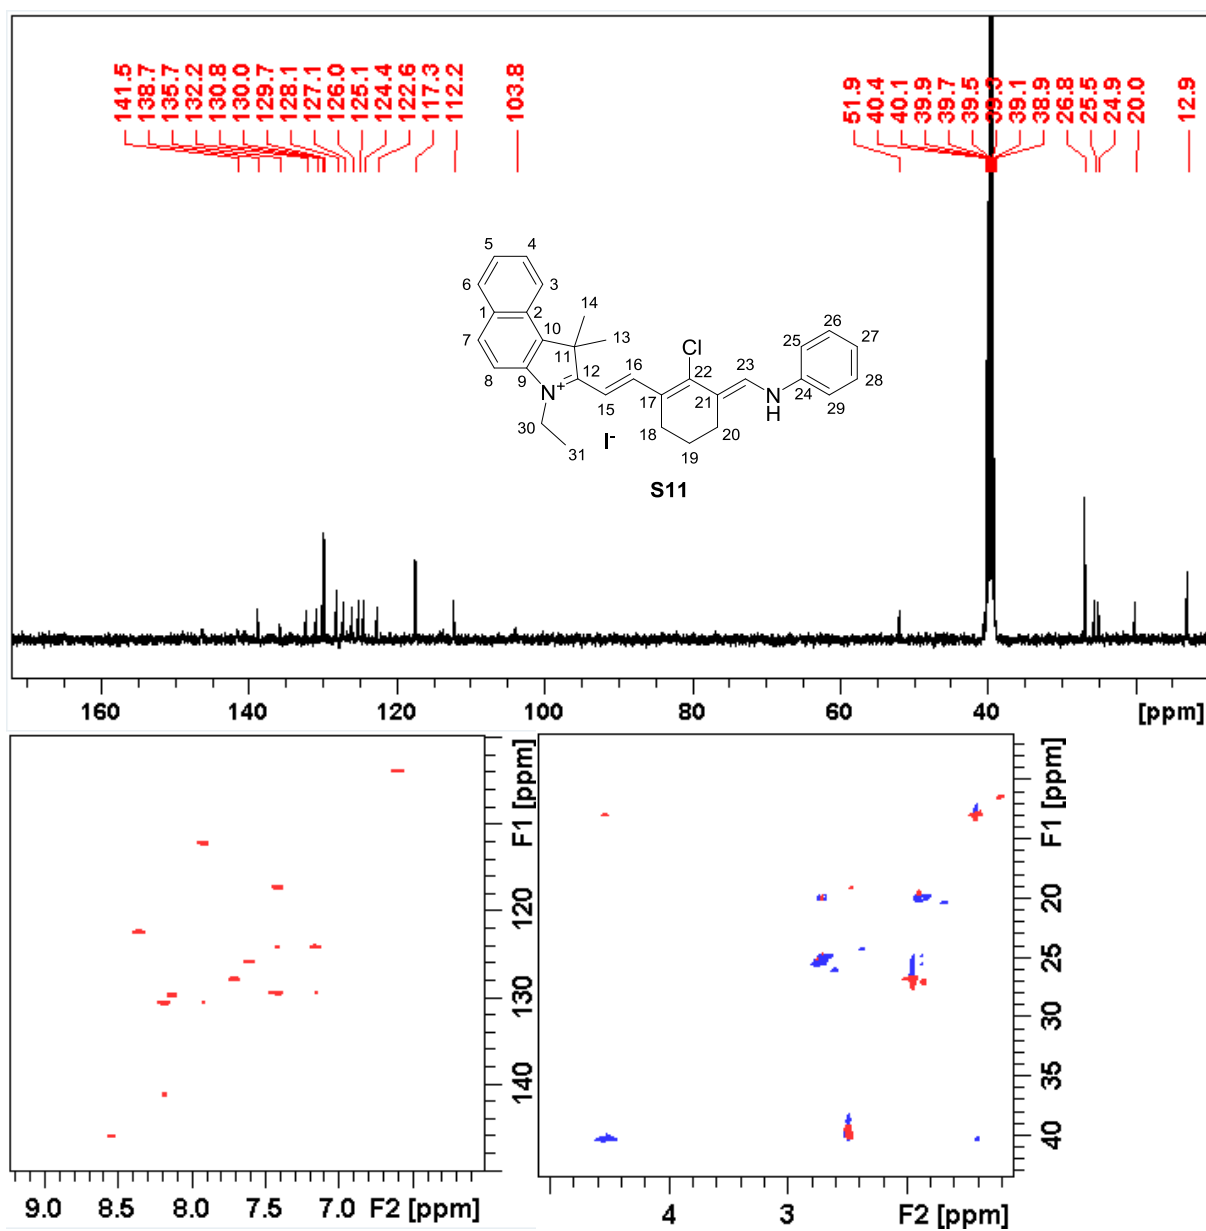

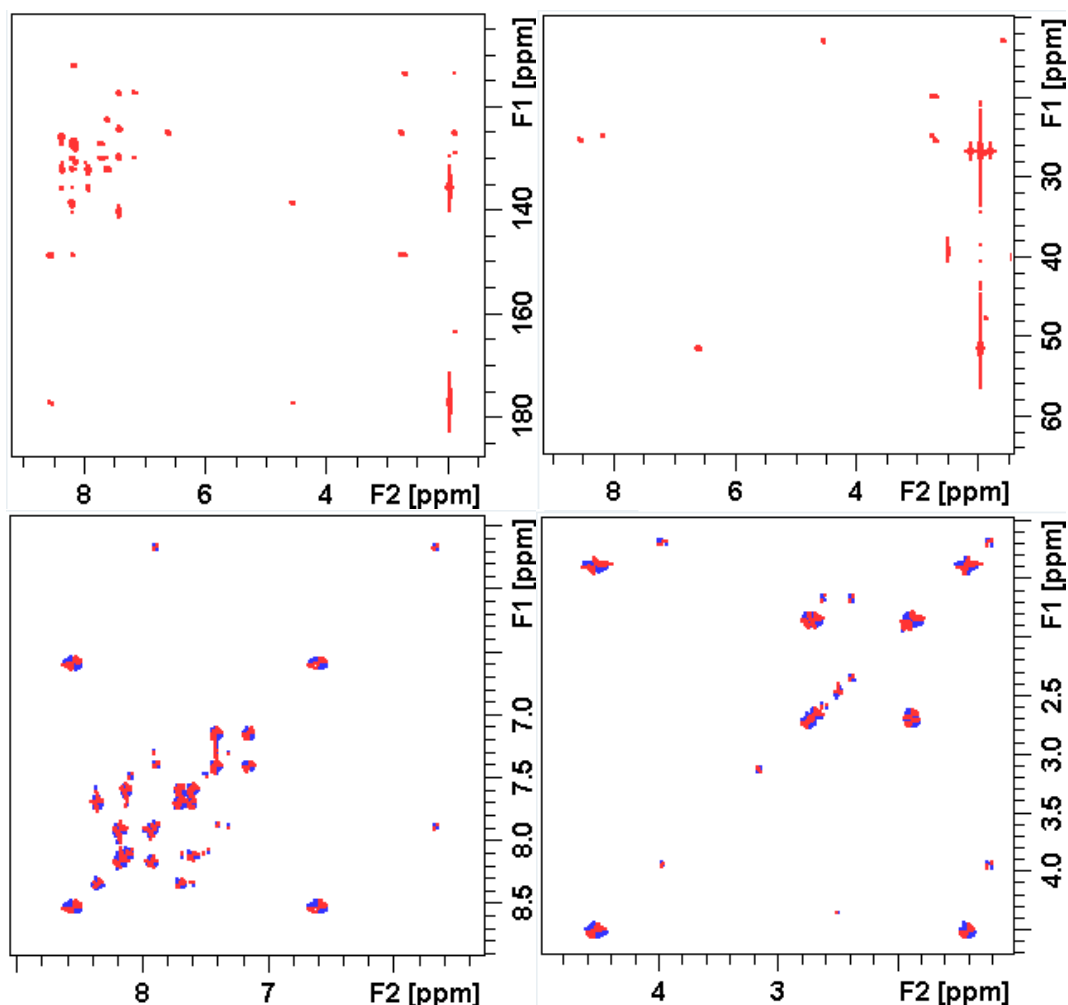

**S11**  $^1\text{H}$ ,  $^{13}\text{C}\{^1\text{H}\}$ , HSQC, HMBC and DQF-COSY NMR ( $\text{DMSO-d}_6$ )

### 1.5 2-(2-(2-Chloro-3-((phenylamino)methylene)cyclohex-1-en-1-yl)vinyl)-1-octylquinolin-1-ium iodide (**S12**)

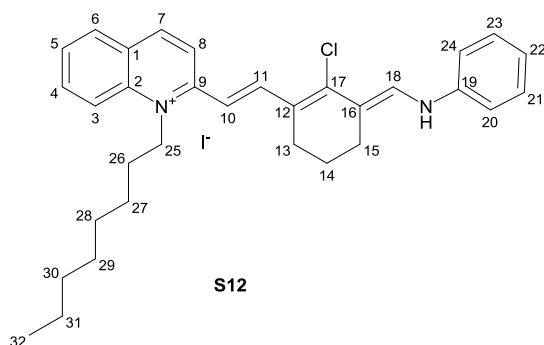

2-Methyl-1-octylquinolin-1-ium iodide **S3** (20 mmol, 7.66 g) and *N*-((2-chloro-3-((phenylimino)methyl) cyclohex-2-en-1-ylidene)methyl)aniline hydrochloride **S6** (22 mmol, 7.90 g) were dissolved in anhydrous ethanol (150 ml) and heated to 80 °C for 18 h. Afterwards, the crude product was isolated by hot filtration, washed with ethanol (50 ml) and dried under reduced pressure at 40 °C for 20 h to yield green shiny powder **S12** (7.46 g, 60.8%). d.p. 250 °C.  $^1\text{H}$  NMR ( $\text{DMSO-d}_6$ , 400.1 MHz):  $\delta$  9.20 (d,  $J = 12.9$ , 1H, NH), 8.74 (d,  $J = 9.2$ , 1H, H-7), 8.40 (d,  $J = 9.2$ , 1H, H-8), 8.38 (d,  $J = 9.5$ , 1H, H-3), 8.34 (d,  $J = 14.9$ , 1H, H-11), 8.24 (dd,  $J = 8.1$ , 1.1, 1H, H-6), 8.06 (m, 1H, H-4), 7.81 (m, 1H, H-5), 7.75 (d,  $J = 12.9$ , 1H, H-18), 7.31 (m, 2H, H-21, 23), 7.22 (m, 2H, H-20, 24), 6.98 (m, 1H, H-22), 6.82 (d,



$J = 14.9$ , 1H, H-10), 4.88 (m, 2H, H-25), 2.69 (t,  $J = 5.9$ , 2H, H-13), 2.62 (t,  $J = 5.9$ , 2H, H-15), 1.85 (m, 2H, H-26), 1.85 (m, 2H, H-14), 1.53 (m, 2H, H-27), 1.38 (m, 2H, H-28), 1.28 (m, 2H, H-29), 1.26 (m, 2H, H-31), 1.26 (m, 2H, H-30), 0.86 (t,  $J = 7.0$ , 3H, H-32).  $^{13}\text{C}$  NMR (DMSO- $d_6$ , 100.6 MHz):  $\delta$  154.7 (s, C-9), 143.9 (d, C-11), 142.6 (s, C-17), 142.3 (d, C-7), 141.4 (s, C-19), 138.4 (s, C-2), 134.8 (d, C-18), 134.5 (d, C-4), 130.1 (d, C-6), 129.5 (d, C-21, 23), 128.1 (d, C-5), 127.2 (s, C-1), 124.8 (s, C-12), 122.2 (d, C-22), 120.7 (d, C-8), 118.4 (d, C-3), 115.7 (d, C-20, 24), 113.2 (d, C-10), 110.9 (s, C-16), 49.7 (t, C-25), 31.2 (t, C-30), 28.6 (t, C-29), 28.5 (t, C-28), 27.9 (t, C-26), 26.2 (t, C-13), 25.8 (t, C-27), 24.7 (t, C-15), 22.0 (t, C-31), 20.3 (t, C-14), 14.0 (q, C-32). HMBC correlations: H-3  $\rightarrow$  C-(1, 5), H-4  $\rightarrow$  C-(2, 6), H-5  $\rightarrow$  C-(1, 2w, 3, 4, 6w), H-6  $\rightarrow$  C-(1w, 2, 4, 7), H-7  $\rightarrow$  C-(1, 2, 6, 8w, 9), H-8  $\rightarrow$  C-(1, 9, 10w), H-10  $\rightarrow$  C-(8, 11, 12), H-11  $\rightarrow$  C-(9, 10w, 13, 17), H-13  $\rightarrow$  C-(11w, 12, 14, 15, 17), H-14  $\rightarrow$  C-(12, 13, 15, 16), H-15  $\rightarrow$  C-(13, 14, 16, 17, 18), H-18  $\rightarrow$  C-(15, 17, 19), H-20, 24  $\rightarrow$  C-(20, 22, 24), H-21, 23  $\rightarrow$  C-(19, 21, 23), H-22  $\rightarrow$  C-(20, 21w, 23w, 24), H-25  $\rightarrow$  C-(2, 9, 26, 27), H-26  $\rightarrow$  C-(25, 27, 28), H-27  $\rightarrow$  C-(25, 26, 29), H-28  $\rightarrow$  C-(27, 29, 30), H-32  $\rightarrow$  C-(30, 31), NH  $\rightarrow$  C-(16, 19w, 20, 24). DQF-COSY correlations: H-3  $\rightarrow$  H-(4), H-4  $\rightarrow$  H-(3, 5), H-5  $\rightarrow$  H-(4, 6), H-6  $\rightarrow$  H-(5), H-7  $\rightarrow$  H-(8), H-8  $\rightarrow$  H-(7), H-10  $\rightarrow$  H-(11), H-11  $\rightarrow$  H-(10), H-13  $\rightarrow$  H-(14), H-14  $\rightarrow$  H-(13, 15), H-15  $\rightarrow$  H-(14), H-18  $\rightarrow$  NH, H-20, 24  $\rightarrow$  H-(21, 23), H-21, 23  $\rightarrow$  H-(20, 22, 24), H-22  $\rightarrow$  H-(21, 23), H-25  $\rightarrow$  H-(26), H-26  $\rightarrow$  H-(25, 27), H-27  $\rightarrow$  H-(26, 28), H-28  $\rightarrow$  H-(27, 29), H-31  $\rightarrow$  H-(32), H-32  $\rightarrow$  H-(31), NH  $\rightarrow$  H-(18). HR-MS (ESI-QTOF): calculated for  $\text{C}_{32}\text{H}_{38}\text{ClIN}_2$  [M-I] $^+$ : 485.2718. Found: 485.2707. Elemental analysis: calculated for  $\text{C}_{32}\text{H}_{38}\text{ClIN}_2$ : C, 62.70 %; H, 6.25 %; N, 4.57 %; Cl, 5.67 %; I, 20.70 %. Found: C, 62.54 %; H, 6.25 %; N, 4.52 %; Cl, 5.69%; I, 20.51 %. IR (ATR,  $\text{cm}^{-1}$ ):  $\lambda_{\text{max}}$  3194, 2925, 2853, 2524, 1627, 1479, 1354, 1219, 1147, 1050, 748. UV-Vis:  $\lambda_{\text{max}}$  627 nm (in ethanol).

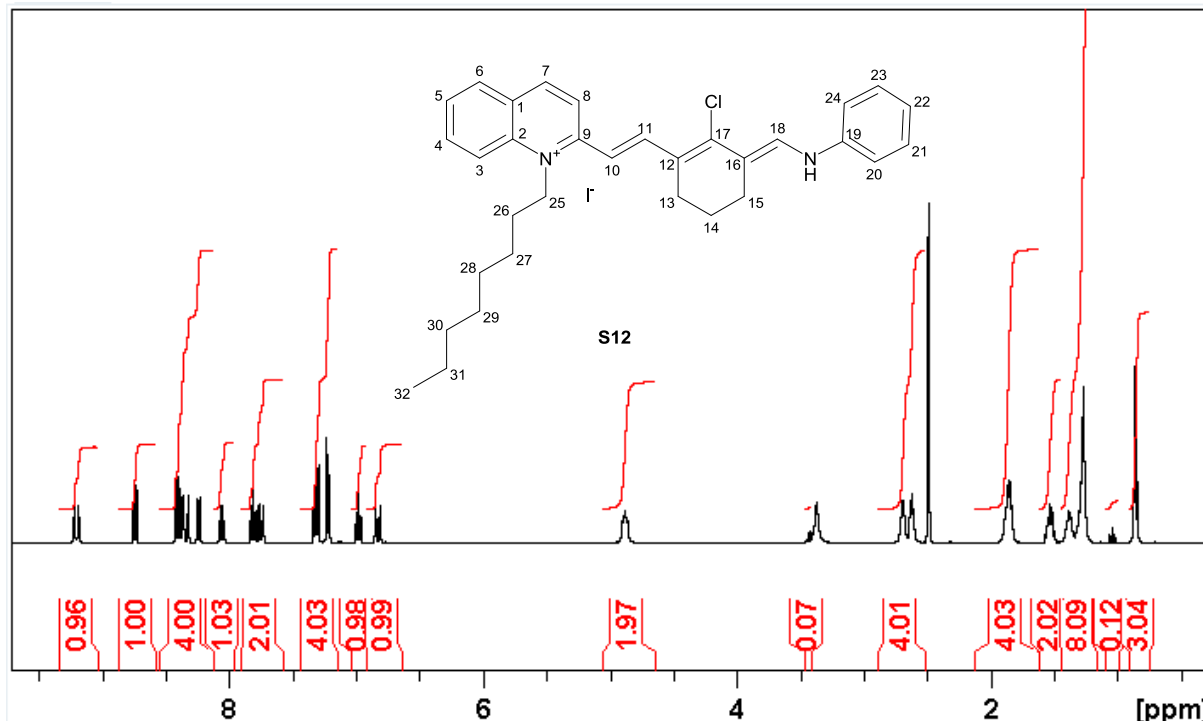

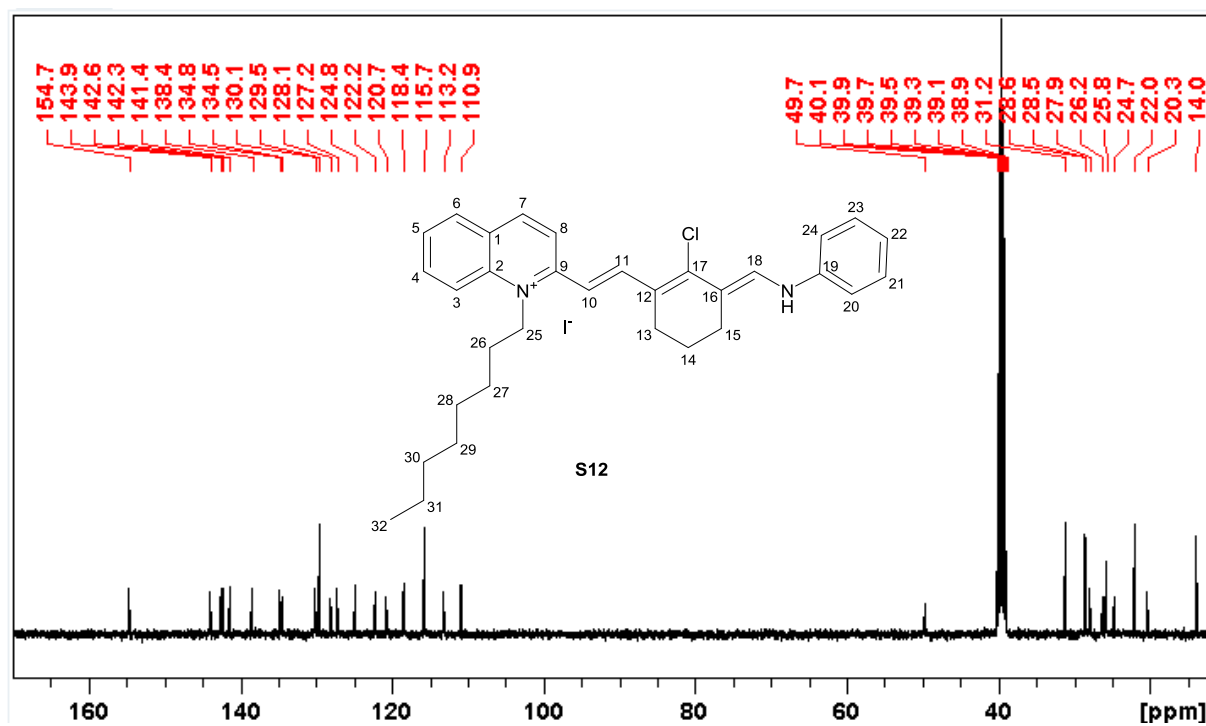

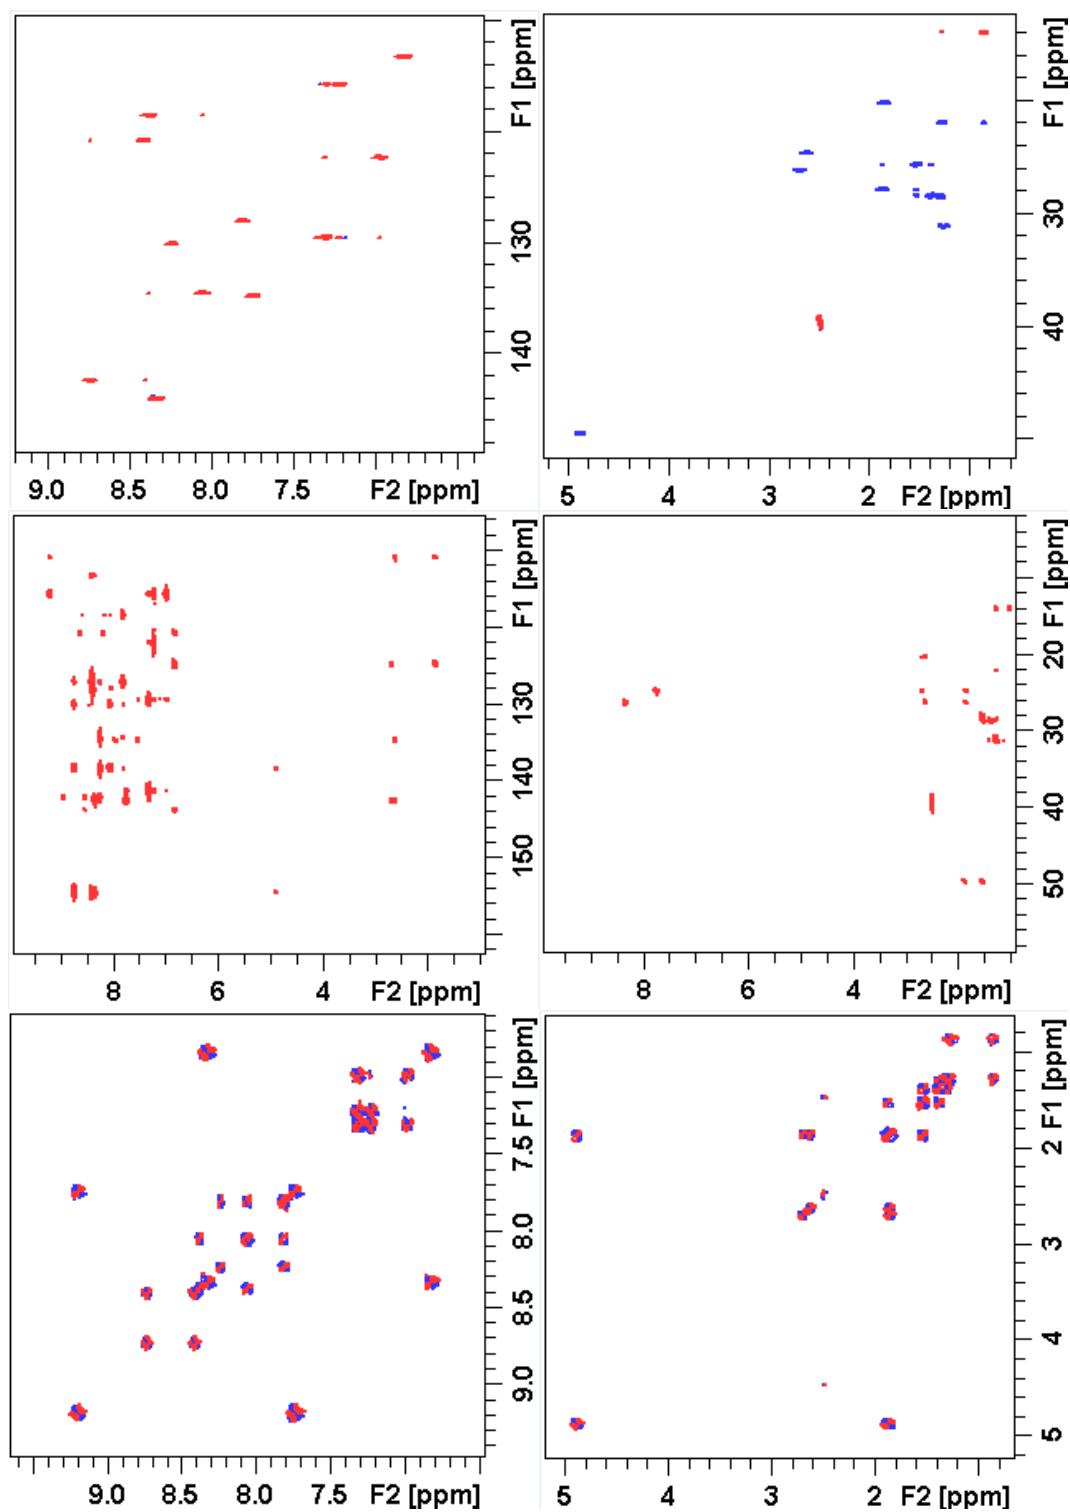

S12  $^1\text{H}$ ,  $^{13}\text{C}\{^1\text{H}\}$ , HSQC, HMBC and DQF-COSY NMR (DMSO- $\text{d}_6$ )

**1.6 2-(2-(2-Chloro-3-((phenylamino)methylene)cyclohex-1-en-1-yl)vinyl)-1,1-dimethyl-3-octyl-1*H*-benzo[*e*]indol-3-ium iodide (**S13**)**

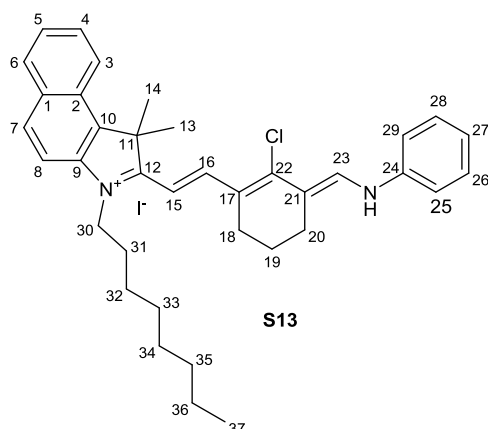

1,1,2-Trimethyl-3-octyl-1*H*-benzo[*e*]indol-3-ium iodide **S2** (20 mmol, 7.66 g) and *N*-((2-chloro-3-((phenylimino)methyl)cyclohex-2-en-1-ylidene)methyl)aniline hydrochloride **S6** (22 mmol, 7.90 g) were dissolved in anhydrous ethanol (150 ml) and heated to 80 °C for 20 h. Subsequently, the reaction mixture was slowly cooled to room temperature and then stored at 4 °C for 20 h. Precipitated starting material was removed by filtration and the filtrate was stored at 4 °C for an additional 48 h. Finally, the crude product precipitated and was isolated by filtration. Further purification by recrystallization from methanol three times (50 ml) and drying under reduced pressure at 40 °C yielded shiny green crystals **S13** (3.97 g, 29.2%). d.p. 218 °C. <sup>1</sup>H NMR (DMSO-*d*<sub>6</sub>, 400.1 MHz): δ 10.15 (s(br), 1H, NH), 8.53 (d, *J* = 14.9, 1H, H-16), 8.35 (d, *J* = 8.5, 1H, H-3), 8.18 (s, 1H, H-23), 8.17 (d, *J* = 8.9, 1H, H-7), 8.12 (d, *J* = 8.2, 1H, H-6), 7.91 (d, *J* = 8.9, 1H, H-8), 7.70 (m, 1H, H-4), 7.60 (m, 1H, H-5), 7.41 (m, 2H, H-26, 28), 7.41 (m, 2H, H-25, 29), 7.15 (m, 1H, H-27), 6.58 (d, *J* = 14.9, 1H, H-15), 4.49 (t, *J* = 7.4, 2H, H-30), 2.73 (m, 2H, H-18), 2.69 (m, 2H, H-20), 1.95 (s, 6H, H-13, 14), 1.88 (m, 2H, H-19), 1.81 (m, 2H, H-31), 1.39 (m, 2H, H-32), 1.32 (m, 2H, H-33), 1.23 (m, 2H, H-34), 1.22 (m, 2H, H-36), 1.21 (m, 2H, H-35), 0.82 (t, *J* = 6.9, 3H, H-37). <sup>13</sup>C NMR (DMSO-*d*<sub>6</sub>, 100.6 MHz): δ 177.7 (s, C-12), 148.9 (s, C-22), 146.1 (d, C-16), 141.5 (d, C-23), 140.4 (s, C-24), 139.1 (s, C-9), 135.5 (s, C-10), 132.1 (s, C-1), 130.7 (d, C-7), 129.9 (d, C-6), 129.7 (d, C-26, 28), 128.1 (d, C-4), 127.1 (s, C-2), 126.0 (d, C-5), 125.0 (s, C-17), 124.4 (d, C-27), 122.6 (d, C-3), 117.4 (d, C-25, 29), 113.6 (s, C-21), 112.4 (d, C-8), 104.0 (d, C-15), 51.8 (s, C-11), 44.9 (t, C-30), 31.1 (t, C-35), 28.6 (t, C-34), 28.5 (t, C-33), 28.2 (q, C-13, 14), 27.6 (t, C-31), 25.9 (t, C-32), 25.5 (t, C-18), 24.9 (t, C-20), 22.0 (t, C-36), 20.0 (t, C-19), 13.9 (q, C-37). HMBC correlations: H-3 → C-(1, 5, 10), H-4 → C-(2, 6), H-5 → C-(1, 3), H-6 → C-(2, 4, 7), H-7 → C-(2, 6, 9), H-8 → C-(1, 10), H-13, 14 → C-(10, 11, 12, 13, 14), H-15 → C-(11, 17), H-16 → C-(12, 18, 22), H-18 → C-(17, 19, 20, 22), H-19 → C-(17, 18, 20, 21), H-20 → C-(18, 19, 21, 22), H-23 → C-(20, 22, 24), H-25, 29 → C-(25, 27, 29), H-26, 28 → C-(24, 26, 28), H-27 → C-(25, 26, 28, 29), H-30 → C-(9, 12, 31, 32), H-31 → C-(30), H-32 → C-(33, 34), H-35 → C-(36, 37), H-36 → C-(35, 37), H-37 → C-(35, 36). DQF-COSY correlations: H-3 → H-(4), H-4 → H-(3, 5), H-5 → H-(4, 6), H-6 → H-(5), H-7 → H-(8), H-8 → H-(7), H-15 → H-(16), H-16 → H-(15), H-18 → H-(19), H-19 → H-(18, 20), H-20 → H-(19), H-26, 28 → H-(27), H-27 → H-(26, 28), H-30 → H-(31), H-31 → H-(30, 32), H-32 → H-(31, 33), H-33 → H-(32), H-36 → H-(37), H-37 → H-(36). HR-MS (ESI-QTOF): calculated for C<sub>37</sub>H<sub>44</sub>ClN<sub>2</sub> [M-I]<sup>+</sup>: 551.3188. Found: 551.3189. Elemental analysis: calculated for C<sub>37</sub>H<sub>44</sub>ClIN<sub>2</sub>: C, 65.44 %; H, 6.53 %; N, 4.12 %; Cl, 5.22 %; I, 18.69 %. Found: C, 56.29 %; H, 5.66 %; N, 3.49 %. IR (ATR, cm<sup>-1</sup>): λ<sub>max</sub> 2921, 2853, 1624, 1548, 1430, 1231, 892, 745. UV-Vis: λ<sub>max</sub> 670 nm (in ethanol).

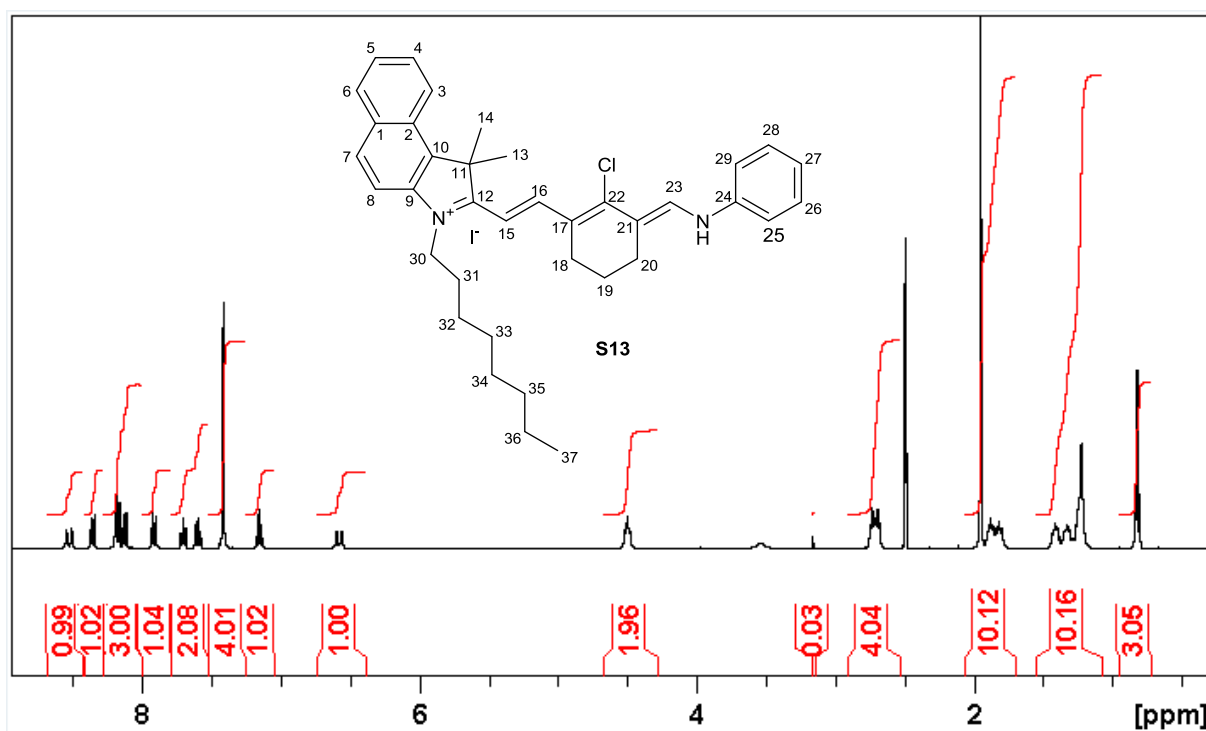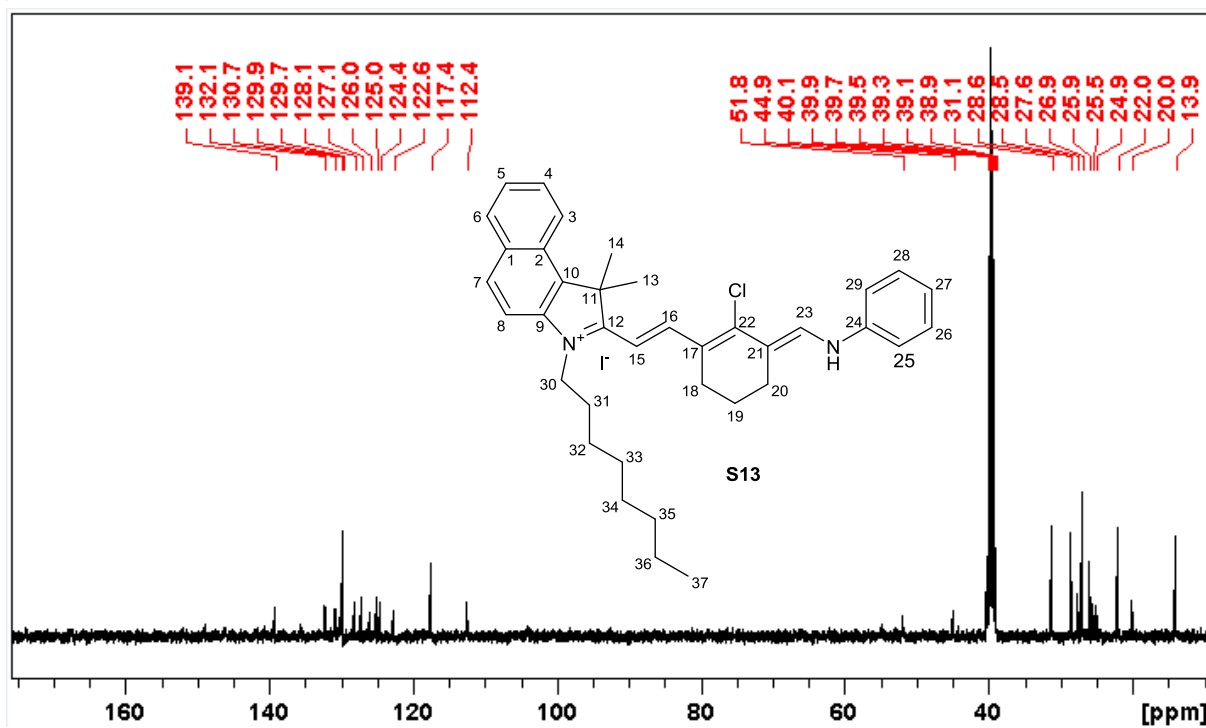

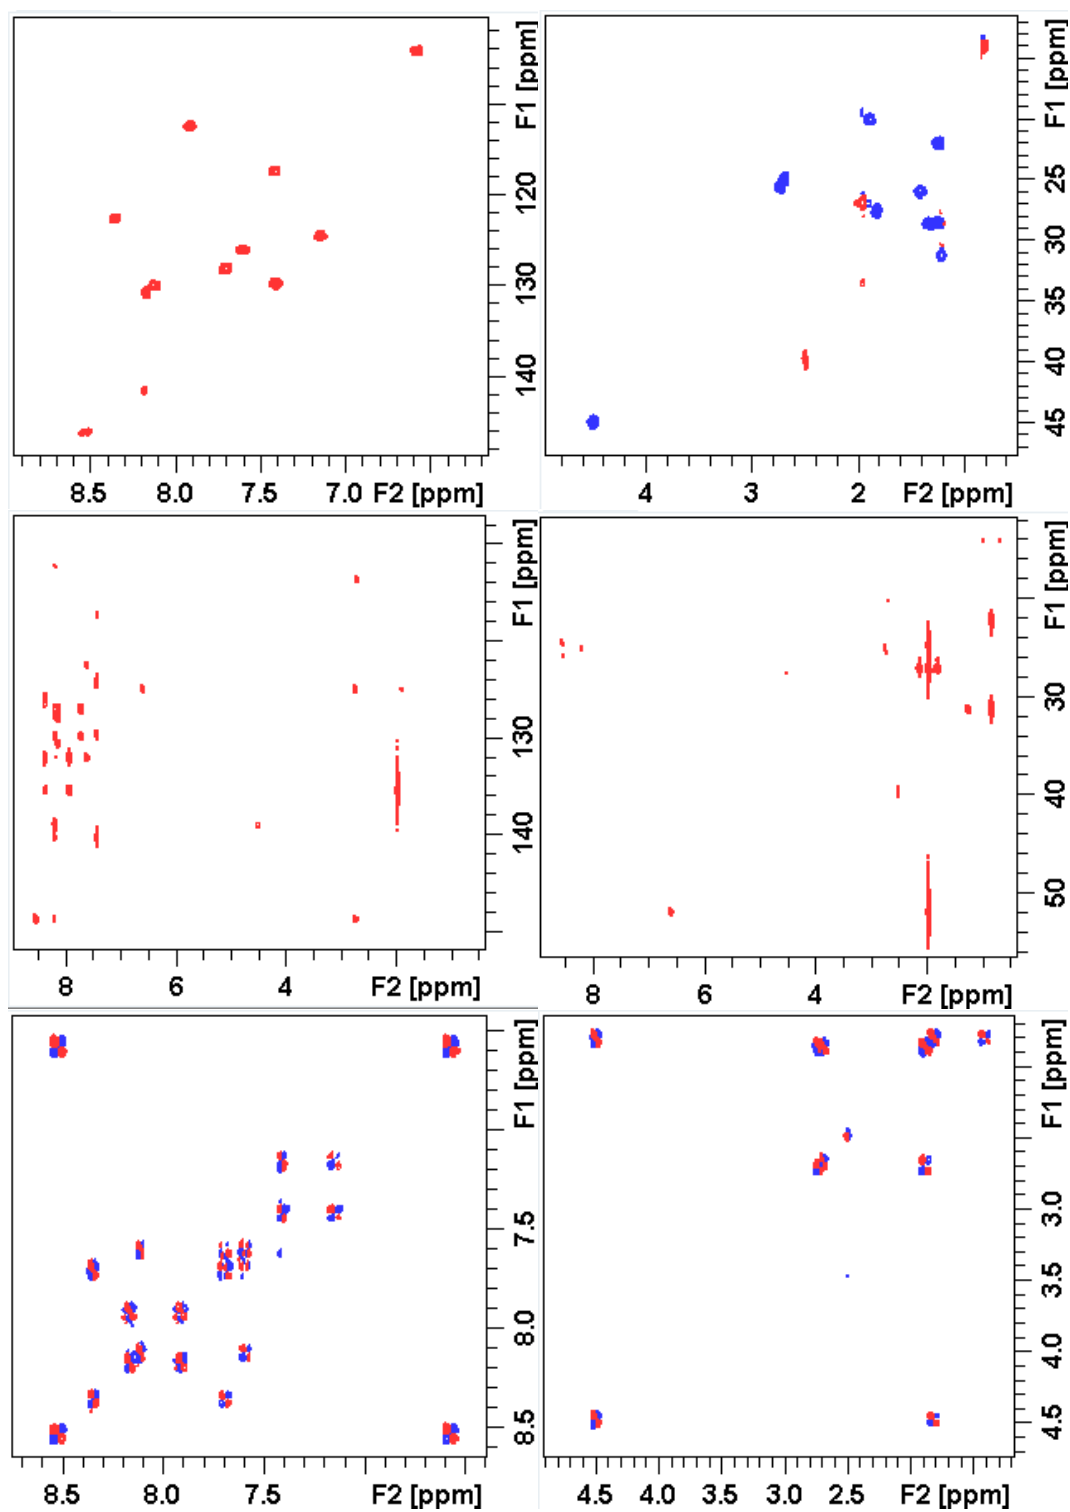

S13  $^1\text{H}$ ,  $^{13}\text{C}\{^1\text{H}\}$ , HSQC, HMBC and DQF-COSY NMR (DMSO- $d_6$ )

**1.7 4-(2-(2-Chloro-3-((phenylamino)methylene)cyclohex-1-en-1-yl)vinyl)-1-octylquinolin-1-ium iodide (S14)**

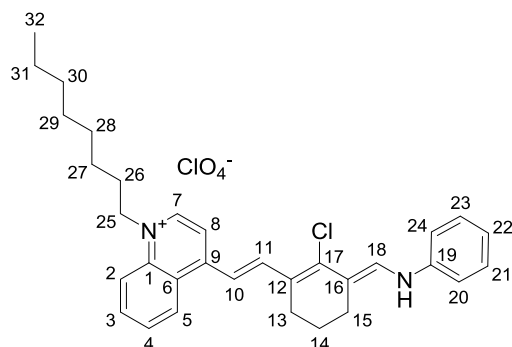

**S14**

4-Methyl-1-octylquinolin-1-ium iodide **S4** (26.5 mmol, 10.15 g) and *N*-((2-chloro-3-((phenylimino)methyl)cyclohex-2-en-1-ylidene)methyl)aniline hydrochloride **S6** (29.1 mmol, 10.46 g) were dissolved in anhydrous ethanol (150 ml) and heated to 80 °C for 48 h. After the reaction, the solution was cooled to room temperature and the product precipitated. The precipitate was collected by filtration, washed with cold ethanol twice (50 ml each) and dried under reduced pressure at 40 °C for 20 h to yield green shiny crystals **S14** (10.87 g, 70%). d.p. 263 °C. <sup>1</sup>H NMR (DMSO-d<sub>6</sub>, 400.1 MHz): δ 9.05 (d, *J* = 6.8, 1H, H-7), 8.98 (d, *J* = 12.7, 1H, NH), 8.85 (dd, *J* = 8.9, 1.0, 1H, H-5), 8.40 (d, *J* = 8.9, 1H, H-2), 8.28 (d, *J* = 15.1, 1H, H-11), 8.23 (d, *J* = 6.8, 1H, H-8), 8.15 (m, 1H, H-3), 7.92 (m, 1H, H-4), 7.62 (d, *J* = 12.7, 1H, H-18), 7.46 (d, *J* = 15.1, 1H, H-10), 7.29 (m, 2H, H-21, 23), 7.17 (m, 2H, H-20, 24), 6.94 (m, 1H, H-22), 4.85 (t, *J* = 7.4, 2H, H-25), 2.76 (t, *J* = 5.9, 2H, H-13), 2.60 (t, *J* = 5.9, 2H, H-15), 1.88 (m, 2H, H-26), 1.84 (m, 2H, H-14), 1.36 (m, 2H, H-27), 1.32 (m, 2H, H-28), 1.23 (m, 2H, H-29), 1.22 (m, 2H, H-31), 1.20 (m, 2H, H-30), 0.83 (t, *J* = 6.9, 3H, H-32). <sup>13</sup>C NMR (DMSO-d<sub>6</sub>, 100.6 MHz): δ 152.4 (s, C-9), 146.2 (d, C-7), 141.8 (s, C-19), 140.2 (s, C-17), 140.2 (d, C-11), 137.7 (s, C-1), 134.7 (d, C-3), 132.8 (d, C-18), 129.5 (d, C-21, 23), 128.6 (d, C-4), 126.4 (d, C-5), 126.2 (s, C-6), 125.7 (s, C-12), 121.6 (d, C-22), 118.9 (d, C-2), 116.1 (d, C-10), 115.3 (d, C-20, 24), 114.7 (d, C-8), 110.7 (s, C-16), 55.9 (t, C-25), 31.0 (t, C-30), 29.3 (t, C-26), 28.5 (t, C-29), 28.5 (t, C-28), 26.4 (t, C-13), 25.8 (t, C-27), 24.8 (t, C-15), 22.0 (t, C-31), 20.4 (t, C-14), 13.9 (q, C-32). HMBC correlations: H-3 → C-(1, 5), H-4 → C-(2, 6), H-5 → C-(1, 2w, 3, 4, 6w), H-6 → C-(1w, 2, 4, 7), H-7 → C-(1, 2, 6, 8w, 9), H-8 → C-(1, 9, 10w), H-10 → C-(8, 11, 12), H-11 → C-(9, 10w, 13, 17), H-13 → C-(11w, 12, 14, 15, 17), H-14 → C-(12, 13, 15, 16), H-15 → C-(13, 14, 16, 17, 18), H-18 → C-(15, 17, 19), H-20, 24 → C-(20, 22, 24), H-21, 23 → C-(19, 21, 23), H-22 → C-(20, 21w, 23w, 24), H-25 → C-(2, 9, 26, 27), H-26 → C-(25, 27, 28), H-27 → C-(25, 26, 29), H-28 → C-(27, 29, 30), H-32 → C-(30, 31), NH → C-(16, 19w, 20, 24). DQF-COSY correlations: H-3 → H-(4), H-4 → H-(3, 5), H-5 → H-(4, 6), H-6 → H-(5), H-7 → H-(8), H-8 → H-(7), H-10 → H-(11), H-11 → H-(10), H-13 → H-(14), H-14 → H-(13, 15), H-15 → H-(14), H-18 → NH, H-20, 24 → H-(21, 23), H-21, 23 → H-(20, 22, 24), H-22 → H-(21, 23), H-25 → H-(26), H-26 → H-(25, 27), H-27 → H-(26, 28), H-28 → H-(27, 29), H-31 → H-(32), H-32 → H-(31), NH → H-(18). HR-MS (ESI-QTOF): calculated for C<sub>32</sub>H<sub>38</sub>ClN<sub>2</sub> [M-I]<sup>+</sup>: 485.2718. Found: 485.2716. Elemental analysis: calculated for C<sub>32</sub>H<sub>38</sub>ClN<sub>2</sub>: C, 62.70 %; H, 6.25 %; N, 4.57 %; Cl, 5.78 %; I, 20.70 %. Found: C, 62.73 %; H, 6.23 %; N, 4.52 %; Cl, 5.72 %; I, 20.46 %. IR (ATR, cm<sup>-1</sup>): λ<sub>max</sub> 3208, 3045, 2914, 2849, 1775, 1627, 1598, 1552, 1251, 1169, 749, 691. UV-Vis: λ<sub>max</sub> 641 nm (in ethanol).

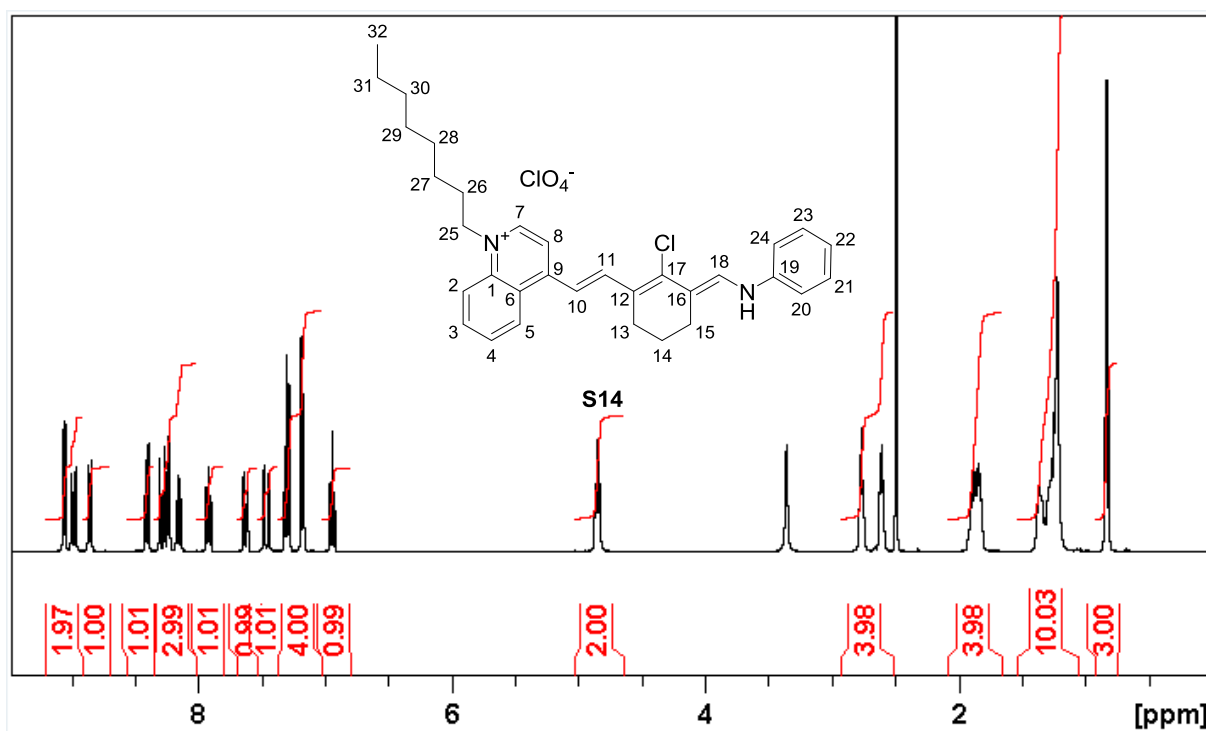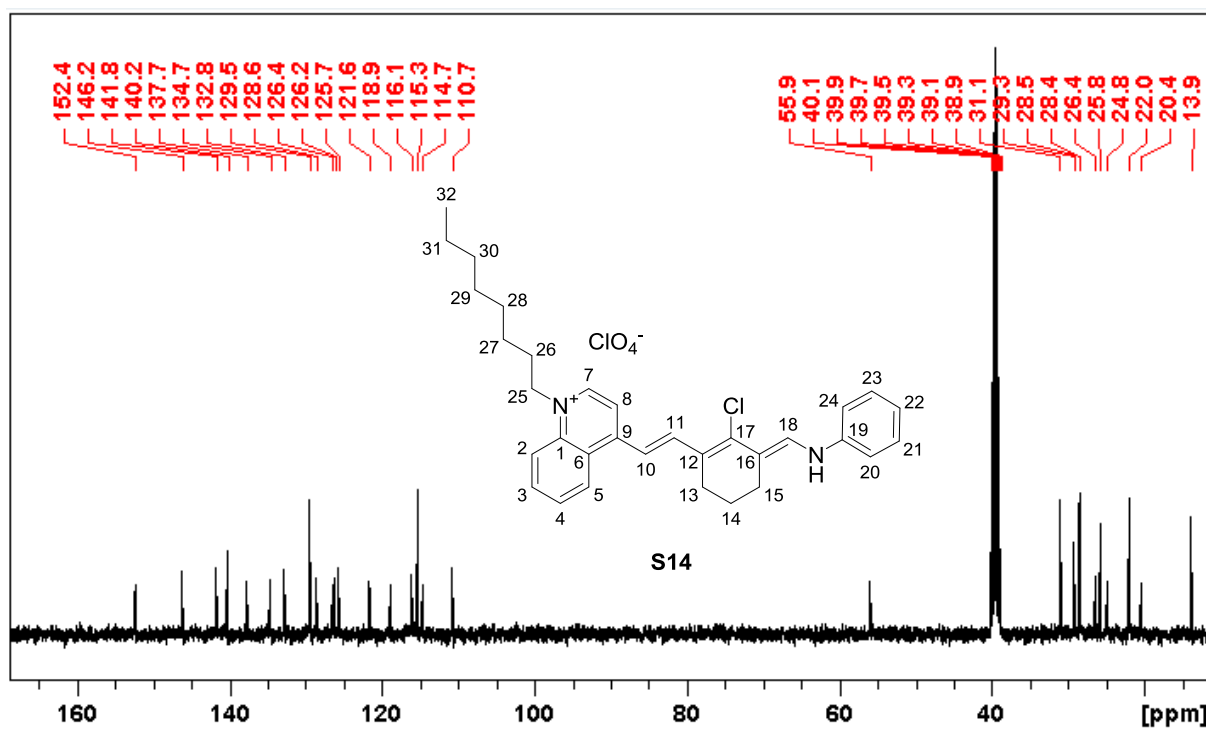



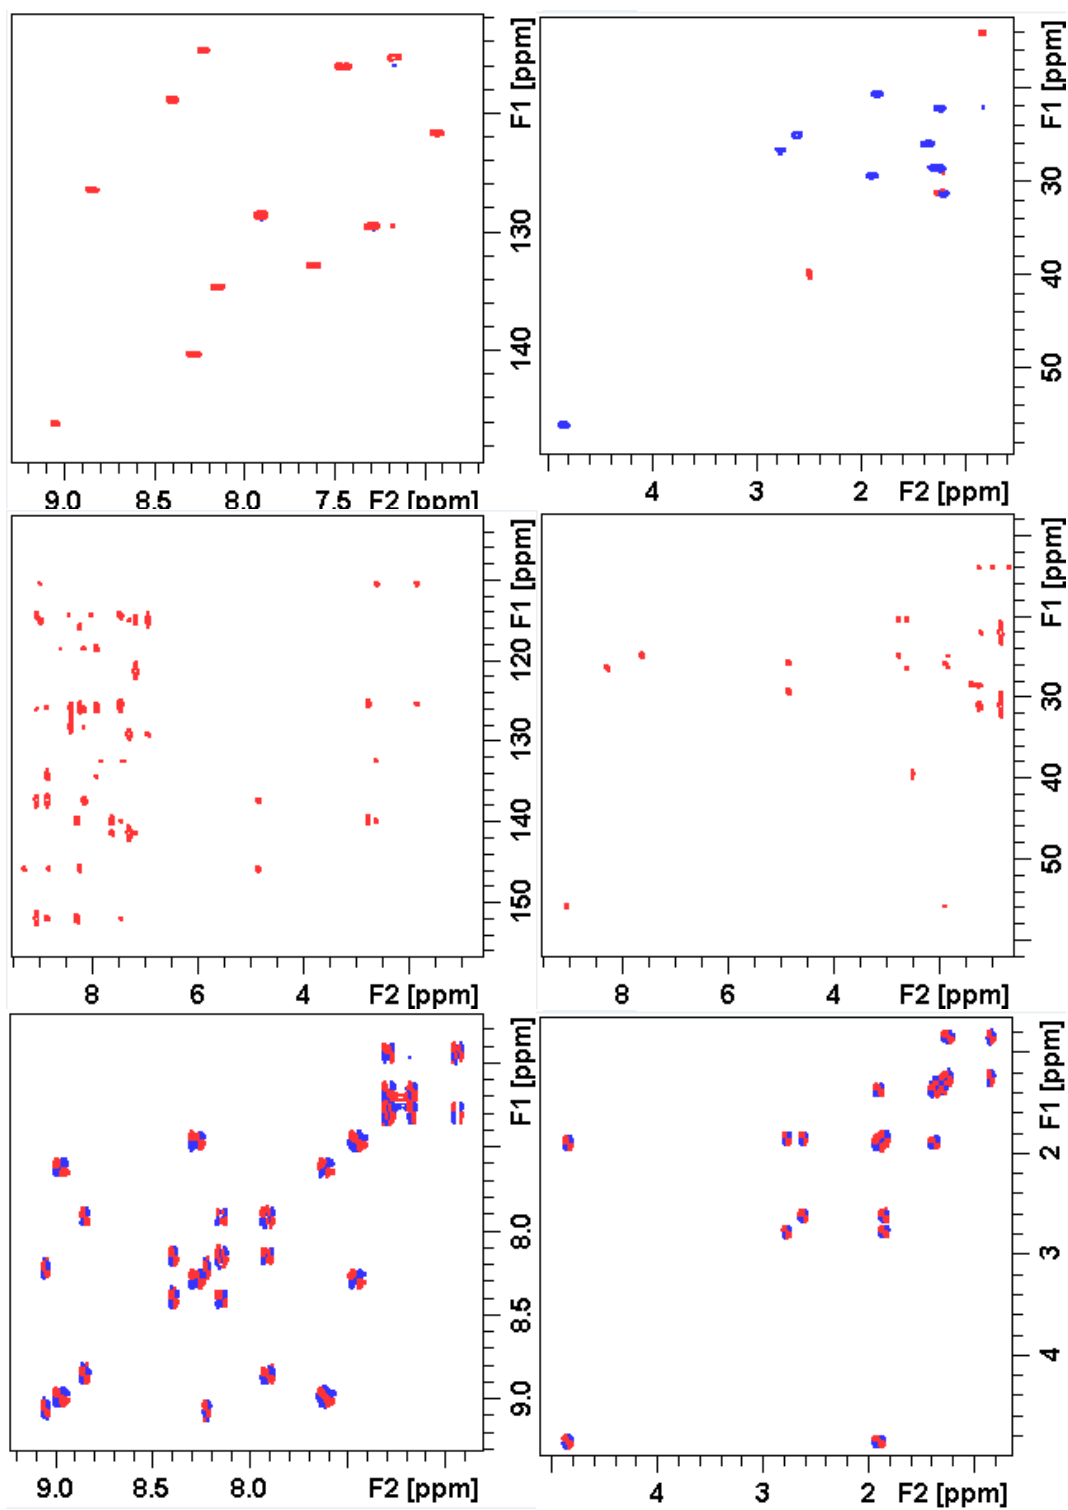

**S14**  $^1\text{H}$ ,  $^{13}\text{C}\{^1\text{H}\}$ , HSQC, HMBC and DQF-COSY NMR (DMSO- $\text{d}_6$ )

**1.8 2-(2-(2-Chloro-3-((phenylamino)methylene)cyclohex-1-en-1-yl)vinyl)-3-ethylbenzothiazol-3-ium iodide (S15)**

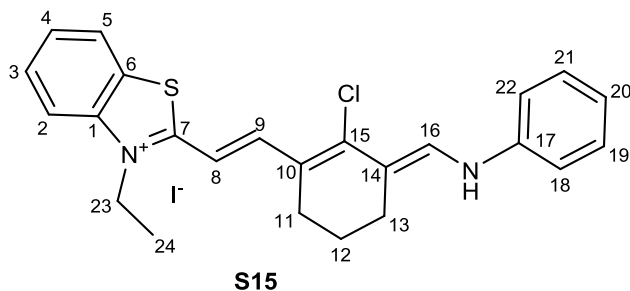

3-Ethyl-2-methylbenzo[d]thiazol-3-ium iodide **S5** (32.8 mmol, 10.00 g) and *N*-((2-chloro-3-((phenylimino)methyl)cyclohex-2-en-1-ylidene) methyl)aniline hydrochloride **S6** (34.4 mmol, 12.36 g) were dissolved in anhydrous ethanol (150 ml) and heated to 80 °C for 18 h. Then, the precipitate was separated by hot filtration and dried under reduced pressure at 40 °C for 20 h. For further purification, the residue was washed with hot ethanol (40 ml) to yield shiny green crystalline powder **S15** (15.21 g, 87%). d.p. 252 °C. <sup>1</sup>H NMR (DMSO-d<sub>6</sub>, 400.1 MHz): δ 9.60 (d (br), *J* = 12.7, 1H, NH), 8.22 (d, *J* = 8.1, 1H, H-5), 8.20 (d, *J* = 14.5, 1H, H-9), 8.09 (d, *J* = 8.5, 1H, H-2), 7.91 (d, *J* = 12.7, 1H, H-16), 7.74 (m, 1H, H-3), 7.63 (m, 1H, H-4), 7.35 (m, 2H, H-19, 21), 7.29 (m, 2H, H-18, 22), 7.05 (m, 1H, H-20), 6.96 (d, *J* = 14.5, 1H, H-8), 4.75 (q, *J* = 7.2, 2H, H-23), 2.69 (t, *J* = 6.0, 2H, H-11), 2.64 (t, *J* = 6.1, 2H, H-13), 1.84 (m, 2H, H-12), 1.39 (t, *J* = 7.2, 3H, H-24). <sup>13</sup>C NMR (DMSO-d<sub>6</sub>, 100.6 MHz): δ 169.5 (s, C-7), 144.9 (s, C-15), 144.7 (d, C-9), 141.1 (s, C-1), 140.9 (s, C-17), 137.7 (d, C-16), 129.6 (d, C-19, 21), 129.0 (d, C-3), 127.3 (d, C-4), 127.0 (s, C-6), 124.4 (s, C-10), 123.9 (d, C-5), 123.2 (d, C-20), 116.4 (d, C-18, 22), 115.5 (d, C-2), 111.7 (s, C-14), 106.4 (d, C-8), 43.2 (t, C-23), 26.1 (t, C-11), 24.8 (t, C-13), 20.0 (t, C-12), 13.6 (q, C-24). HMBC correlations: H-2 → C-(4, 6), H-3 → C-(1, 5), H-4 → C-(2, 6), H-5 → C-(1, 3), H-8 → C-(7, 10), H-9 → C-(7, 11, 15), H-11 → C-(9, 10, 12, 13, 15), H-12 → C-(10, 11, 13, 14), H-13 → C-(11, 12, 14, 15, 16), H-16 → C-(13, 15, 17), H-18, 22 → C-(18, 20, 22), H-19, 21 → C-(17, 19, 21), H-20 → C-(18, 19w, 21w, 22), H-23 → C-(1, 7, 24), H-24 → C-(23). DQF-COSY correlations: H-2 → H-(3), H-3 → H-(2, 4), H-4 → H-(3, 5), H-5 → H-(4), H-8 → H-(9), H-9 → H-(8), H-11 → H-(12), H-12 → H-(11, 13), H-13 → H-(12), H-16 → NH, H-18, 22 → H-(19, 21), H-19, 21 → H-(18, 20, 22), H-20 → H-(19, 21), H-23 → H-(24), H-24 → H-(23), NH → H-(16). HR-MS (ESI-QTOF): calculated for C<sub>24</sub>H<sub>24</sub>ClN<sub>2</sub>S [M-I]<sup>+</sup>: 407.1343. Found: 407.1335. Elemental analysis: calculated for C<sub>24</sub>H<sub>24</sub>ClIN<sub>2</sub>S: C, 53.89 %; H, 4.52 %; N, 5.24 %; S, 5.99%; Cl, 6.63 %; I, 23.73 %. Found: C, 53.95 %; H, 4.64 %; N, 5.18 %; S, 5.93%; Cl, 6.65 %; I, 23.43 %. IR (ATR, cm<sup>-1</sup>): λ<sub>max</sub> 3182, 2924, 1862, 1625, 1538, 1433, 1178, 926, 767, 699. UV-Vis (nm): λ<sub>max</sub> 635 (in ethanol).

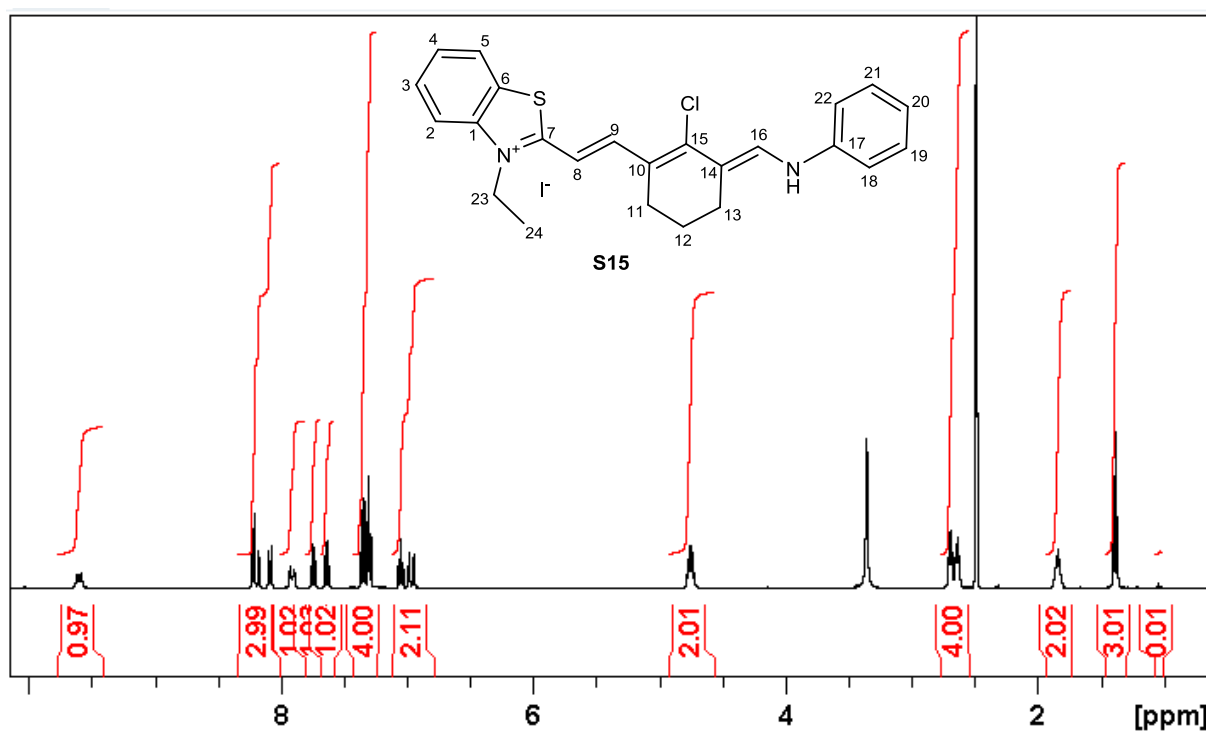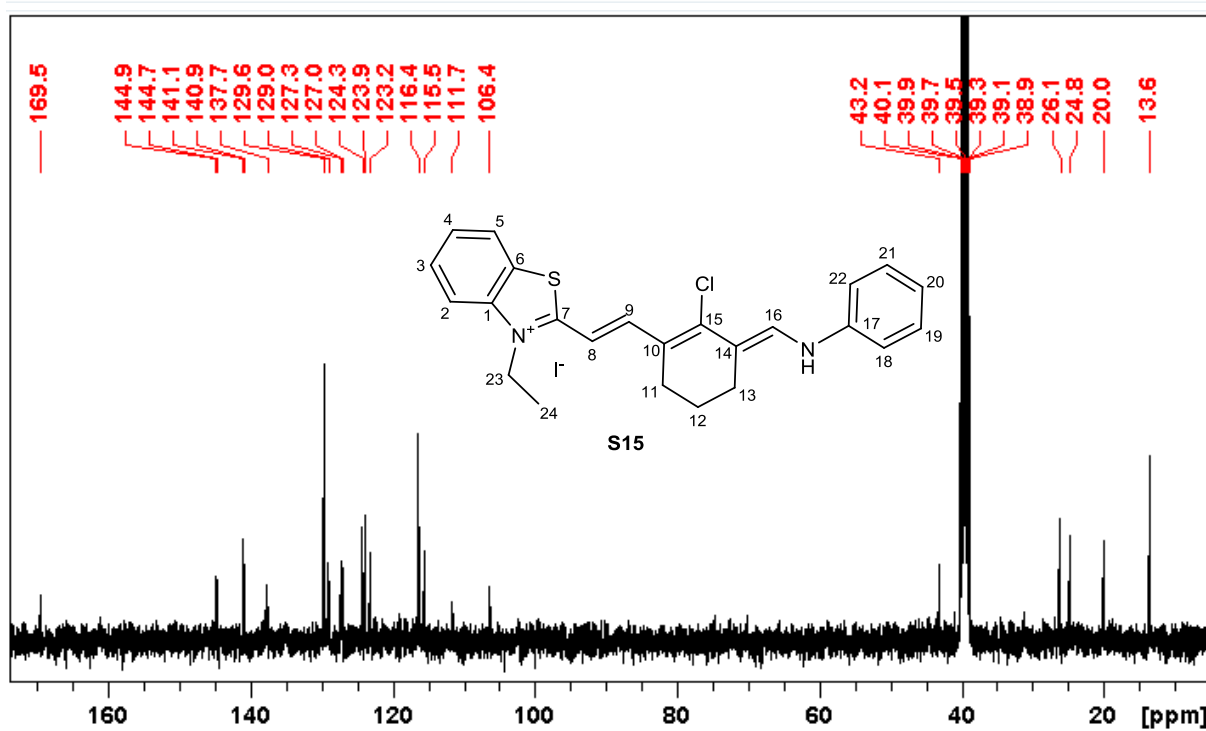

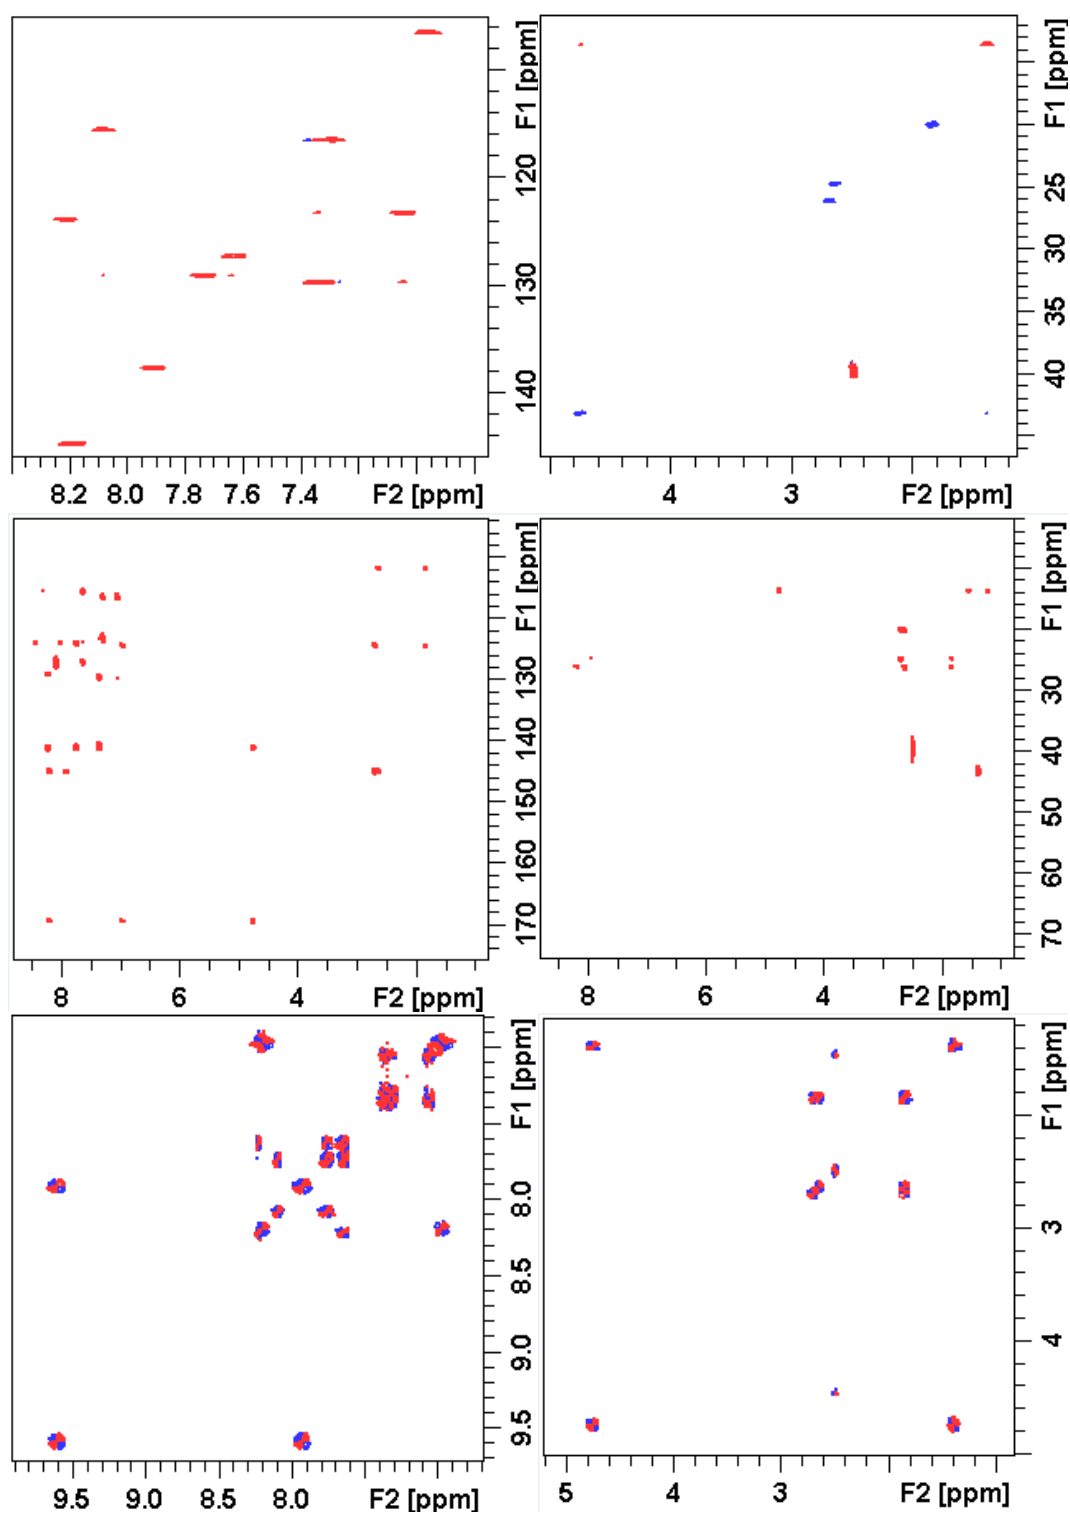

**S15**  $^1\text{H}$ ,  $^{13}\text{C}\{^1\text{H}\}$ , HSQC, HMBC and DQF-COSY NMR (DMSO- $\text{d}_6$ )

**1.9 1-Octyl-2-(2-(6-((phenylamino)methylene)-3,4,5,6-tetrahydro-[1,1'-biphenyl]-2-yl)vinyl)quinolin-1-ium iodide (S16)**

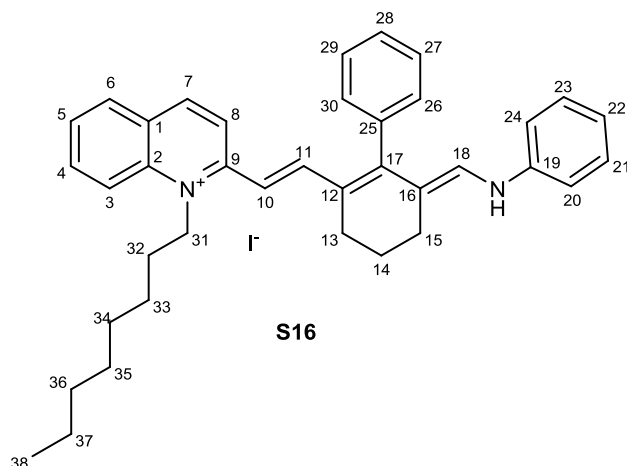

**S16**

2-Methyl-1-octylquinolin-1-ium iodide **S3** (10.4 mmol, 4.00 g) and *N*-((6-((phenylamino)methylene)-3,4,5,6-tetrahydro-[1,1'-biphenyl]-2-yl)methylene)aniline hydrochloride **S7** (10.9 mmol, 4.39g) were dissolved in anhydrous ethanol (80 ml) and heated to 85 °C for 72 h. Then, the solution was cooled to room temperature and stored at 4 °C for 20 h. Precipitated starting material was removed by filtration and the filtrate was stored at 4 °C for 48 h. Subsequently, precipitated crystals were filtered and recrystallized from ethanol (60 ml) to yield the desired half dye **S16** (1.24g, 18.2 %). d.p. 223 °C. <sup>1</sup>H NMR (DMSO-d<sub>6</sub>, 400.1 MHz): δ 9.24 (d, *J* = 12.9, 1H, NH), 8.47 (d, *J* = 9.4, 1H, H-7), 8.26 (d, *J* = 8.9, 1H, H-3), 8.06 (dd, *J* = 8.0, 1.5, 1H, H-6), 7.99 (m, 1H, H-4), 7.72 (m, 1H, H-5), 7.33 (d, *J* = 9.4, 1H, H-8), 7.29 (d, *J* = 14.7, 1H, H-11), 7.21 (m, 2H, H-21, 23), 6.89 (m, 1H, H-22), 6.77 (m, 2H, H-20, 24), 6.63 (d, *J* = 14.7, 1H, H-10), 6.52 (d, *J* = 12.9, 1H, H-18), 4.76 (m, 2H, H-31), 2.69 (t, *J* = 5.9, 2H, H-13), 2.63 (t, *J* = 6.0, 2H, H-15), 1.94 (m, 2H, H-14), 1.83 (m, 2H, H-32), 1.53 (m, 2H, H-33), 1.40 (m, 2H, H-34), 1.31 (m, 2H, H-35), 1.29 (m, 2H, H-37), 1.29 (m, 2H, H-36), 0.87 (t, *J* = 6.8, 3H, H-38). <sup>13</sup>C NMR (DMSO-d<sub>6</sub>, 100.6 MHz): δ 156.0 (s, C-17), 154.2 (s, C-9), 147.1 (d, C-11), 141.4 (d, C-7), 141.3 (s, C-19), 138.4 (s, C-2), 137.7 (d, C-18), 137.4 (s, C-25), 134.2 (d, C-4), 129.9 (d, C-6), 129.5 (d, C-21, 23), 127.5 (s, C-12), 127.5 (d, C-5), 126.4 (s, C-1), 122.1 (d, C-22), 119.1 (d, C-8), 118.0 (d, C-3), 116.3 (s, C-16), 115.2 (d, C-20, 24), 109.5 (d, C-10), 49.2 (t, C-31), 31.2 (t, C-36), 28.6 (t, C-35), 28.5 (t, C-34), 27.6 (t, C-32), 25.8 (t, C-33), 24.7 (t, C-13), 23.5 (t, C-15), 22.1 (t, C-37), 20.7 (t, C-14), 14.0 (q, C-38). HMBC correlations: H-3 → C-(1, 5), H-4 → C-(2, 6), H-5 → C-(1, 3, 4w), H-6 → C-(1, 2, 4, 7), H-7 → C-(1, 2, 6, 9), H-8 → C-(1, 9, 10w), H-10 → C-(8, 11w, 12), H-11 → C-(9, 13, 17), H-13 → C-(12, 14, 15, 17), H-14 → C-(12, 13, 15, 16), H-15 → C-(13, 14, 16, 17, 18), H-18 → C-(15, 16w, 17, 19), H-20, 24 → C-(19, 20, 22, 24), H-21, 23 → C-(19, 20w, 21, 23, 24w), H-22 → C-(19w, 20, 21w, 23w, 24), H-31 → C-(2, 9, 32), H-32 → C-(31, 33, 34w), H-33 → C-(31, 32, 34), H-34 → C-(33, 35, 36), H-35 → C-(34, 36), H-36 → C-(35, 37, 38), H-37 → C-(36, 38), H-38 → C-(36, 37), NH → C-(16w, 20, 24). DQF-COSY correlations: H-3 → H-(4), H-4 → H-(3, 5), H-5 → H-(4, 6), H-6 → H-(5), H-7 → H-(8), H-8 → H-(7), H-10 → H-(11), H-11 → H-(10), H-13 → H-(14), H-14 → H-(13, 15), H-15 → H-(14), H-18 → NH, H-20, 24 → H-(21, 23), H-21, 23 → H-(20, 22, 24), H-22 → H-(21, 23), H-31 → H-(32), H-32 → H-(31, 33), H-33 → H-(32, 34), H-34 → H-(33, 35), H-35 → H-(34), H-37 → H-(38), H-38 → H-(37), NH → H-(18). HR-MS (ESI-QTOF): calculated for C<sub>38</sub>H<sub>43</sub>N<sub>2</sub> [M-I]<sup>+</sup>: 527.3421. Found: 527.3420. Elemental analysis: calculated for C<sub>38</sub>H<sub>43</sub>IN<sub>2</sub>: C, 69.72 %; H, 6.62 %; N, 4.28 %; I, 19.38 %. Found: C, 68.29 %; H, 6.49 %; N, 4.13 %. IR (ATR, cm<sup>-1</sup>): λ<sub>max</sub> 3044, 2922, 2853, 1624, 1599, 1368, 1217, 1142, 962, 748. UV-Vis: λ<sub>max</sub> 645 nm (in ethanol).

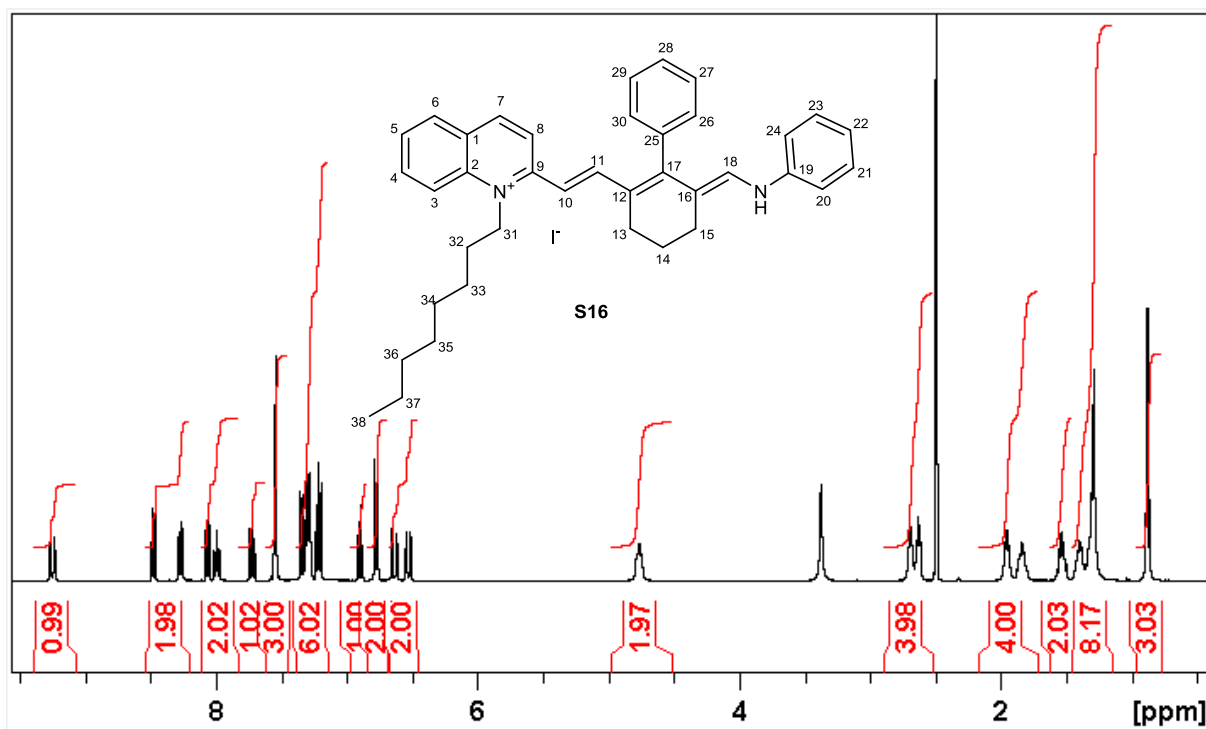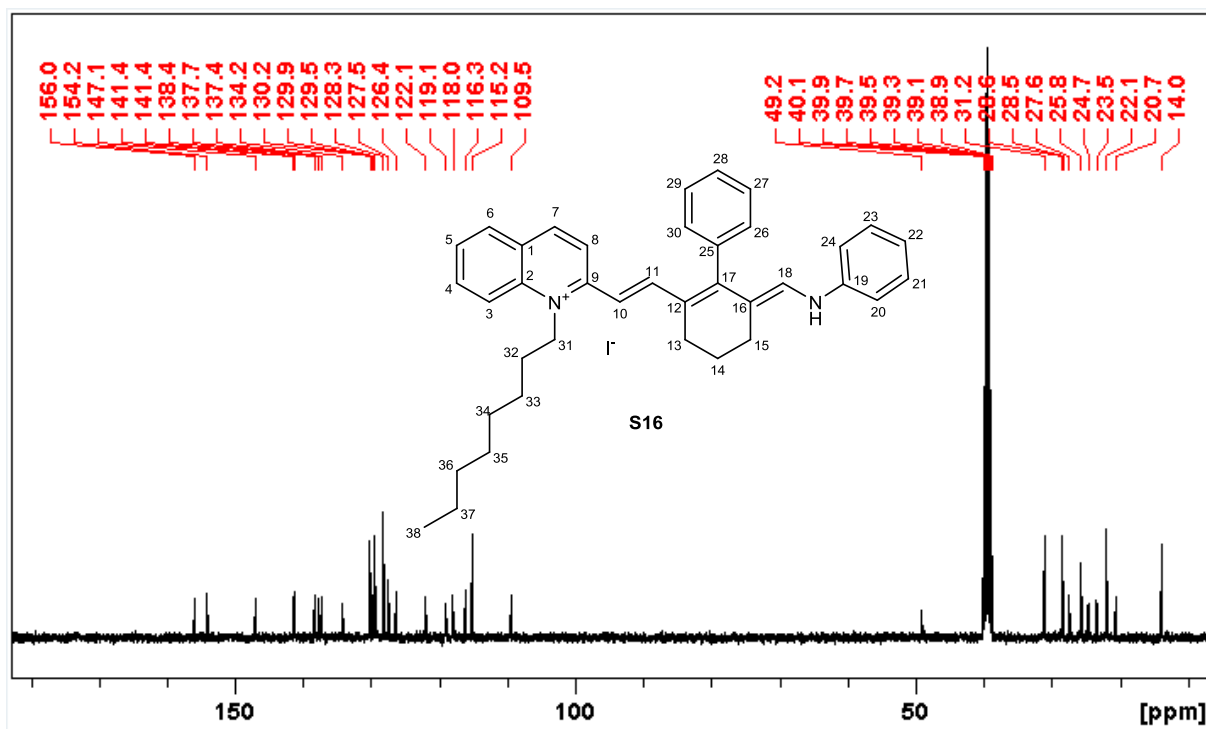

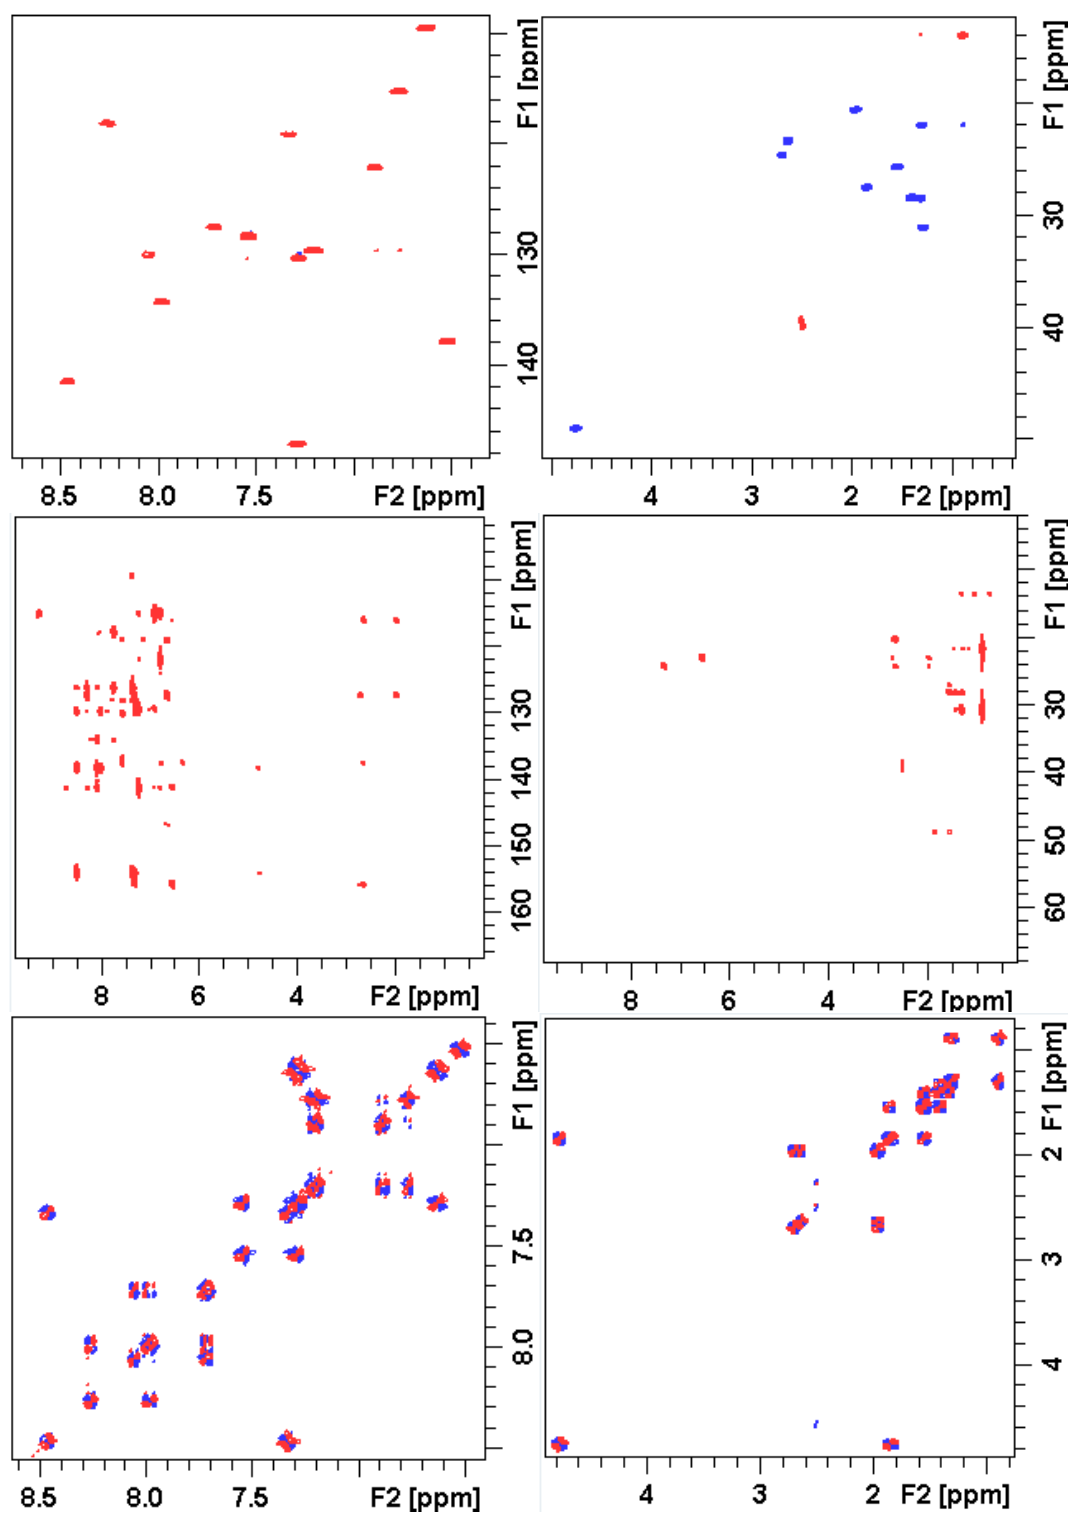

**S16**  $^1\text{H}$ ,  $^{13}\text{C}\{^1\text{H}\}$ , HSQC, HMBC and DQF-COSY NMR ( $\text{DMSO-d}_6$ )

**1.10 2-(2-(3-(2-(6-carboxy-1-ethylquinolin-2(1H)-ylidene)ethylidene)-2-chlorocyclohex-1-en-1-yl)vinyl)-3-ethyl-1,1-dimethyl-1H-benzo[e]indol-3-ium iodide (Hepta1)**

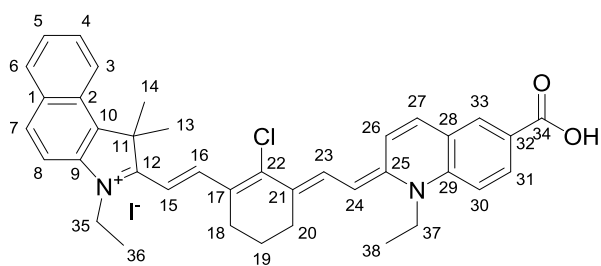

**Hepta1**

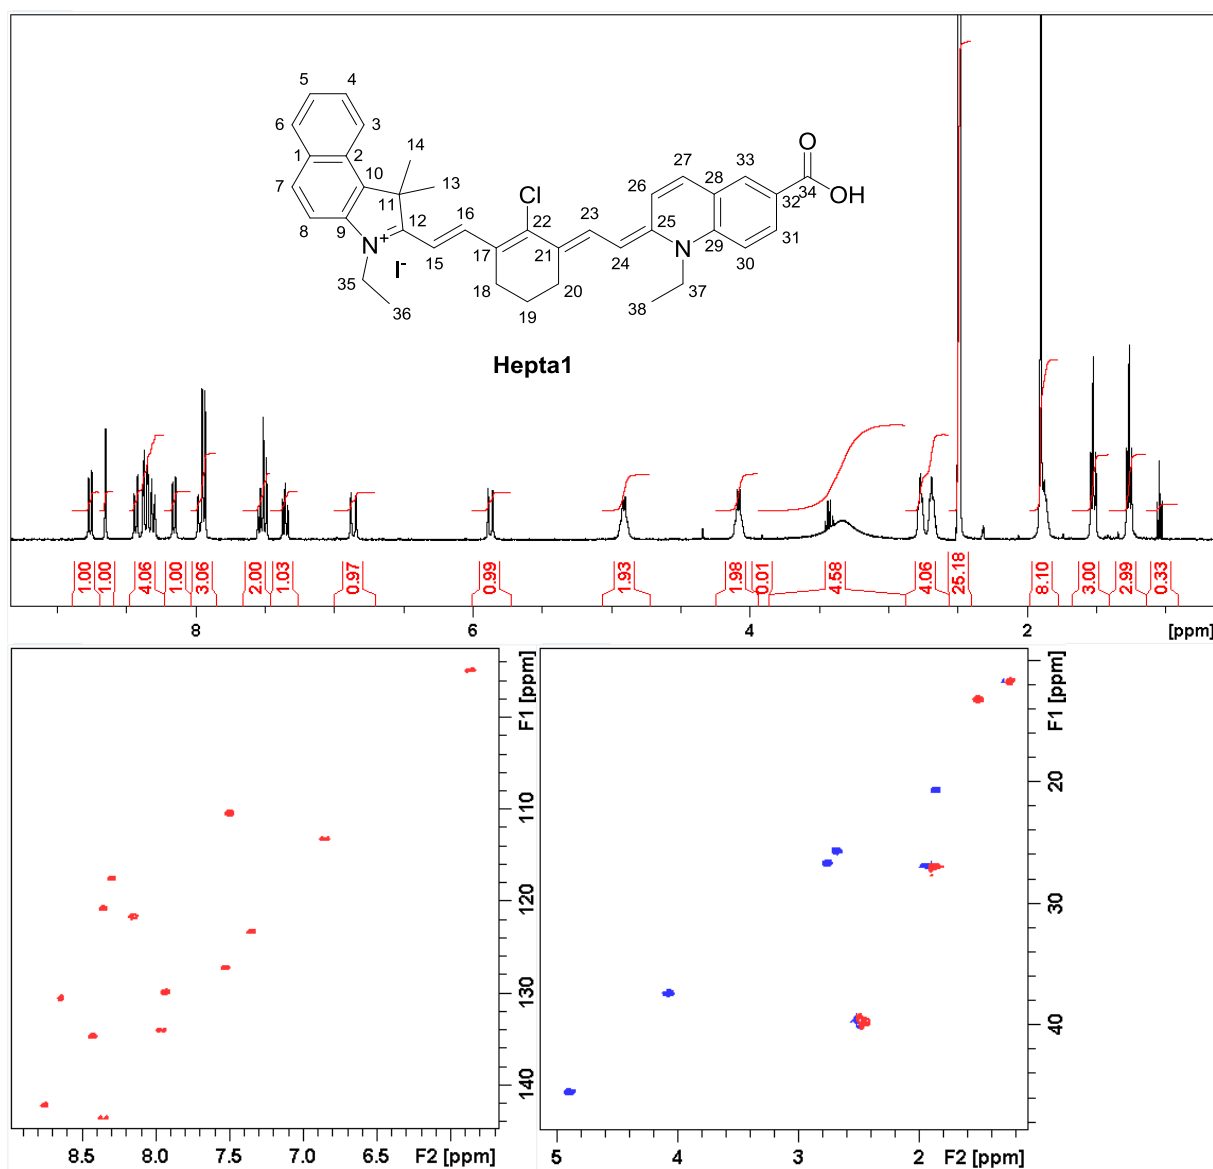



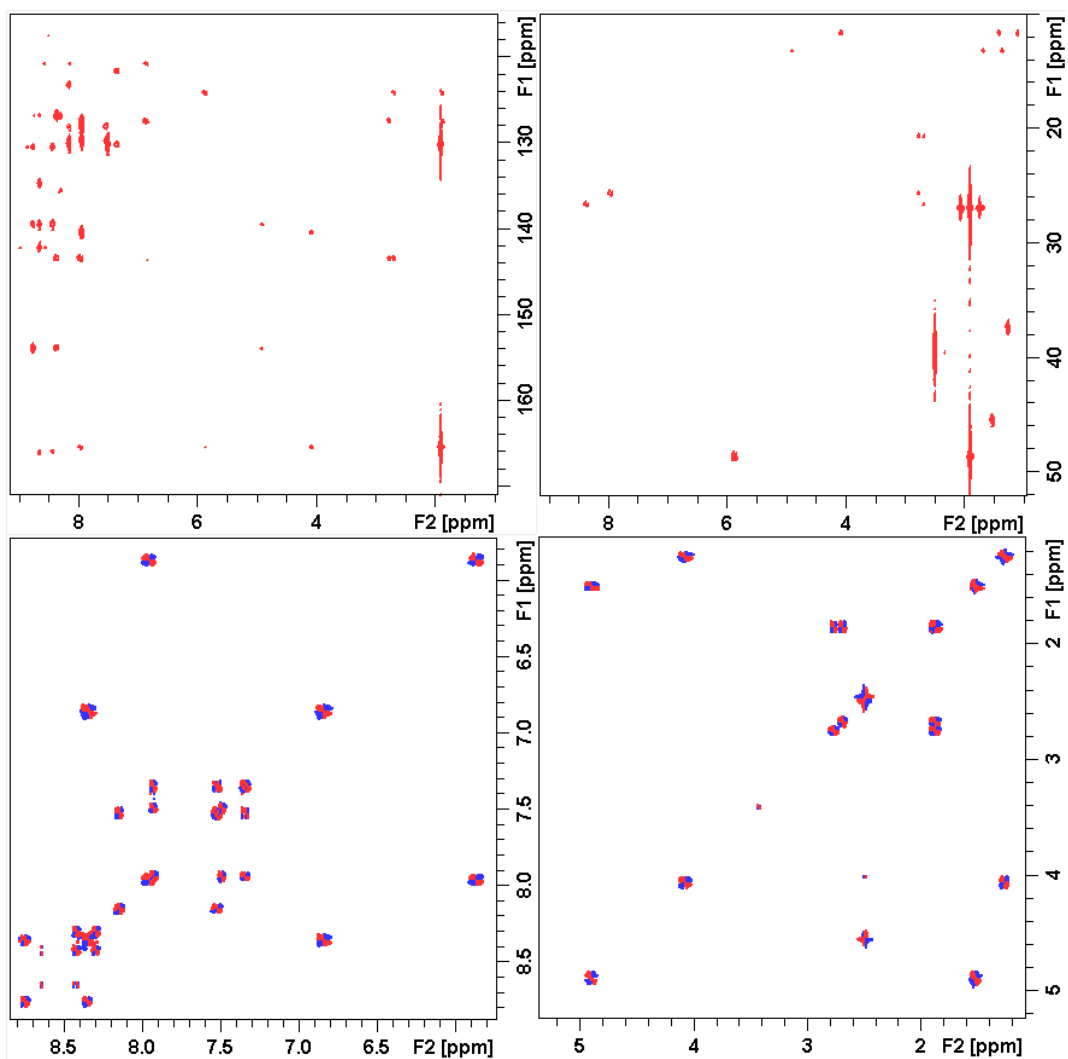

**Hepta1** <sup>1</sup>H, HSQC, HMBC and DQF-COSY NMR (DMSO-d<sub>6</sub>)

**1.11 2-(2-(3-(2-(6-carboxy-1-ethylquinolin-2(1*H*)-ylidene)ethylidene)-2-chlorocyclohex-1-en-1-yl)vinyl)-1,1-dimethyl-3-octyl-1*H*-benzo[*e*]indol-3-ium iodide (Hepta2)**

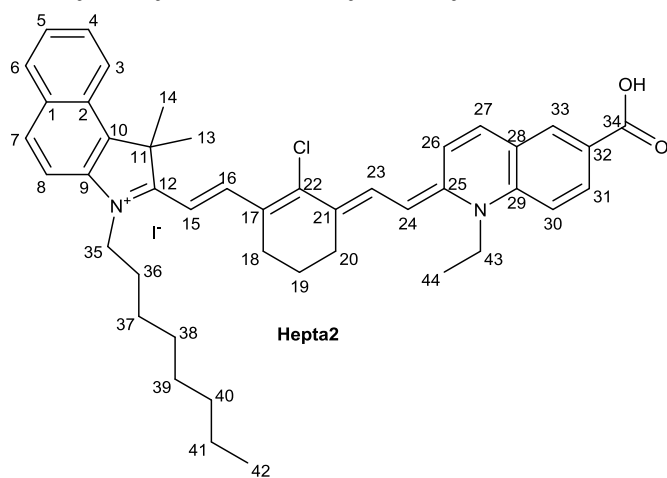

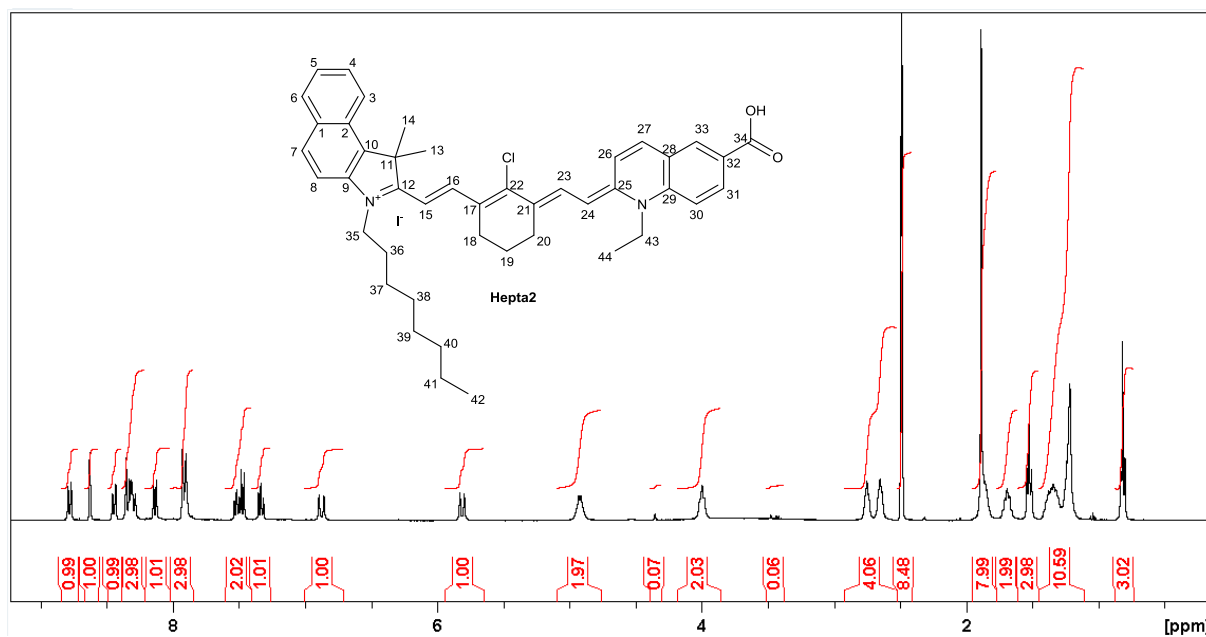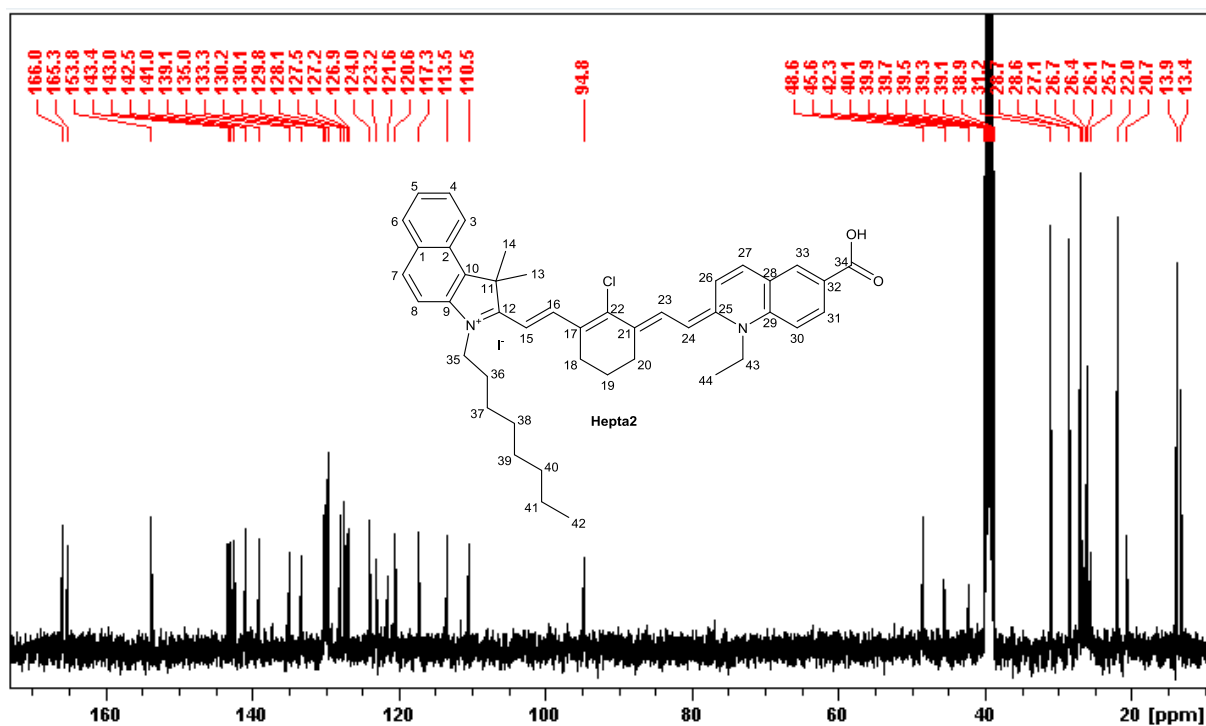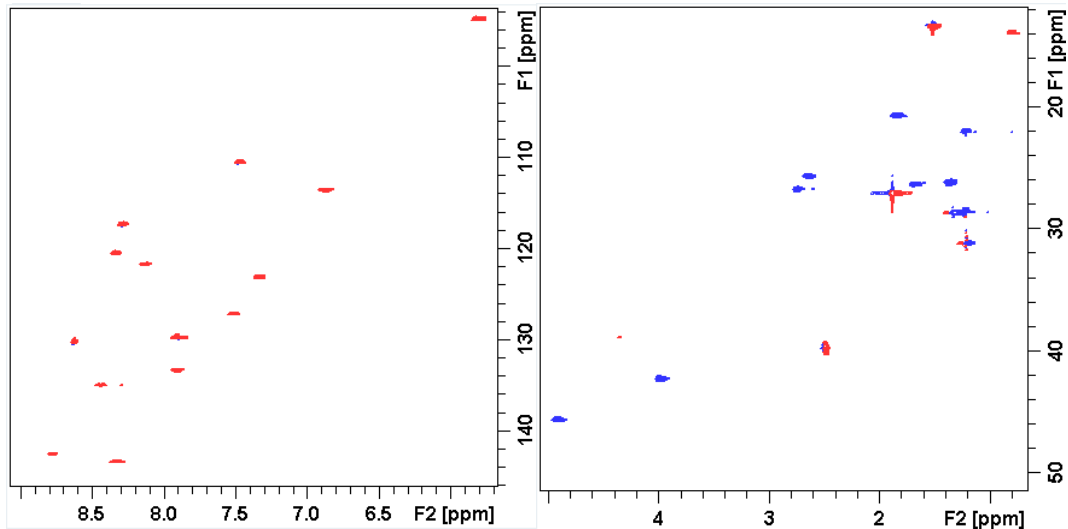

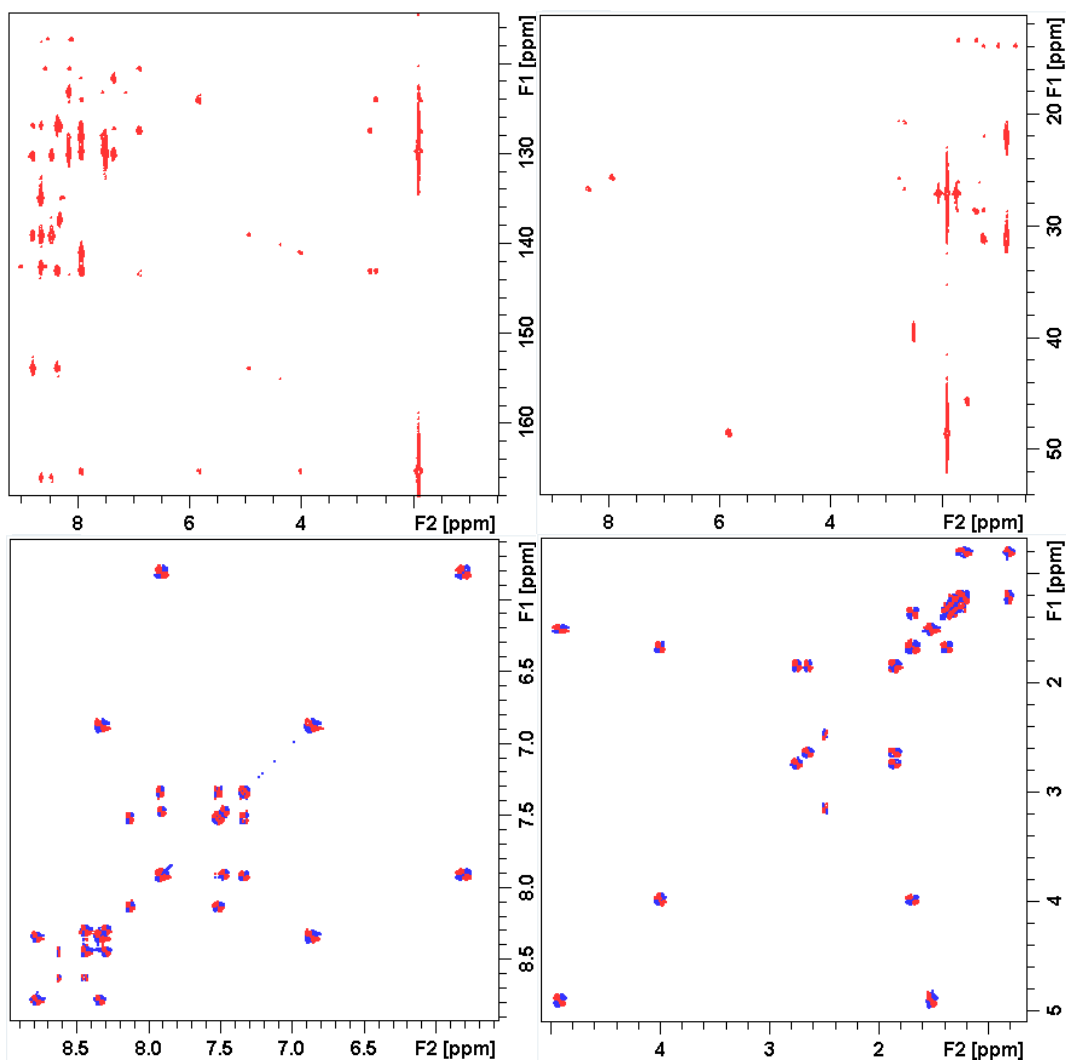

**Hepta2**  $^1\text{H}$ ,  $^{13}\text{C}\{^1\text{H}\}$ , HSQC, HMBC and DQF-COSY NMR (DMSO- $d_6$ )

**1.12 2-(2-(3-(2-(5-carboxy-3,3-dimethyl-1-octylindolin-2-ylidene)ethylidene)-2-chlorocyclohex-1-en-1-yl)vinyl)-1-octylquinolin-1-ium iodide (Hepta3)**

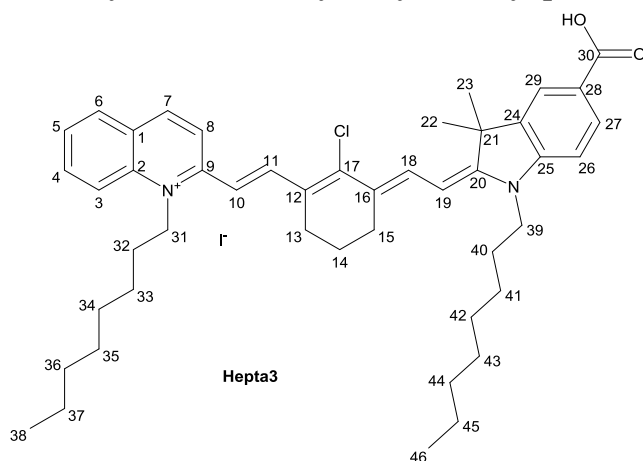

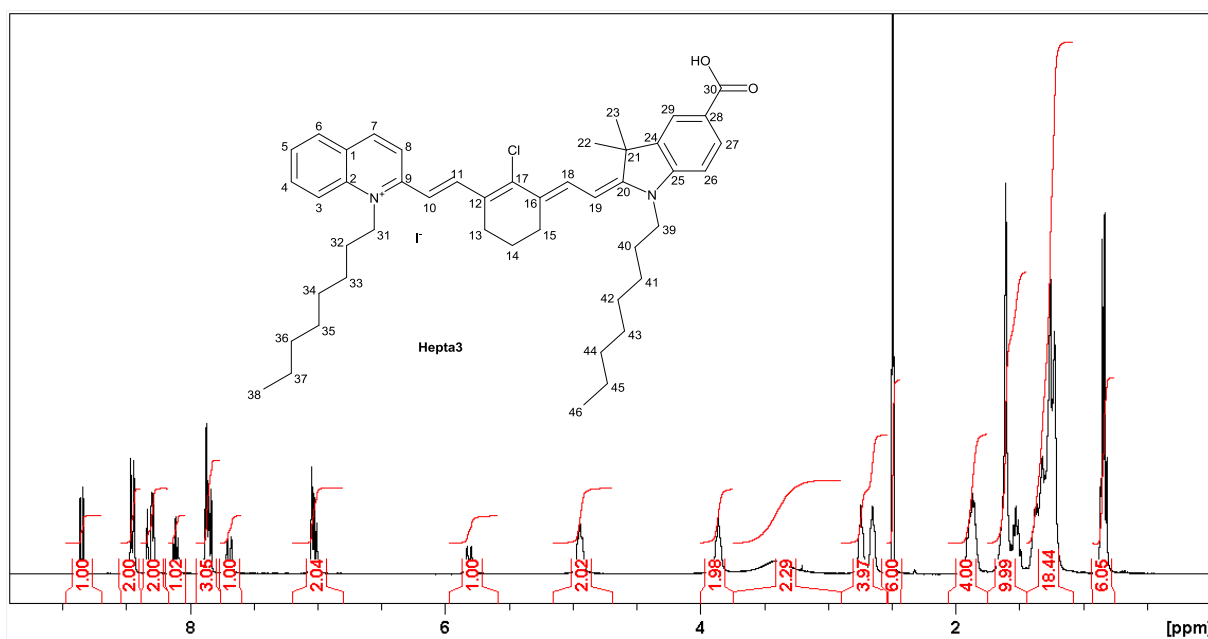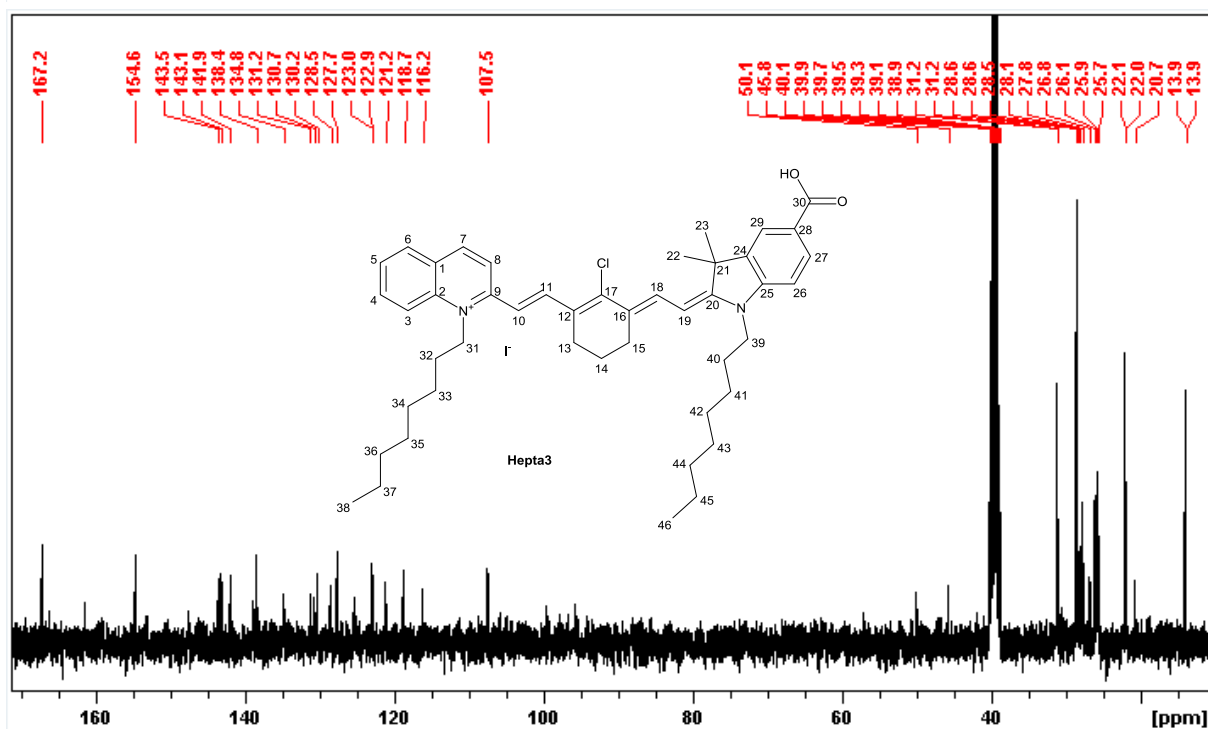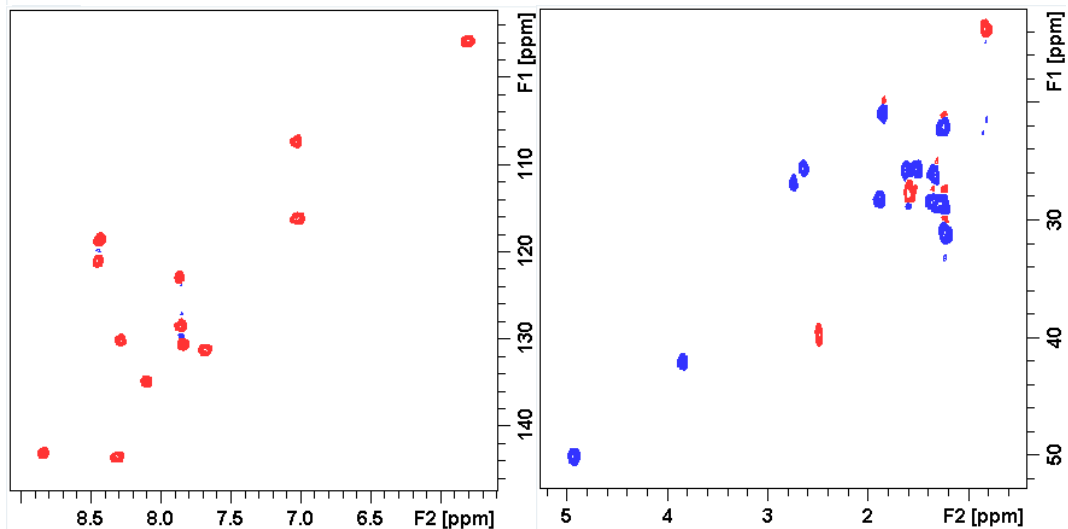

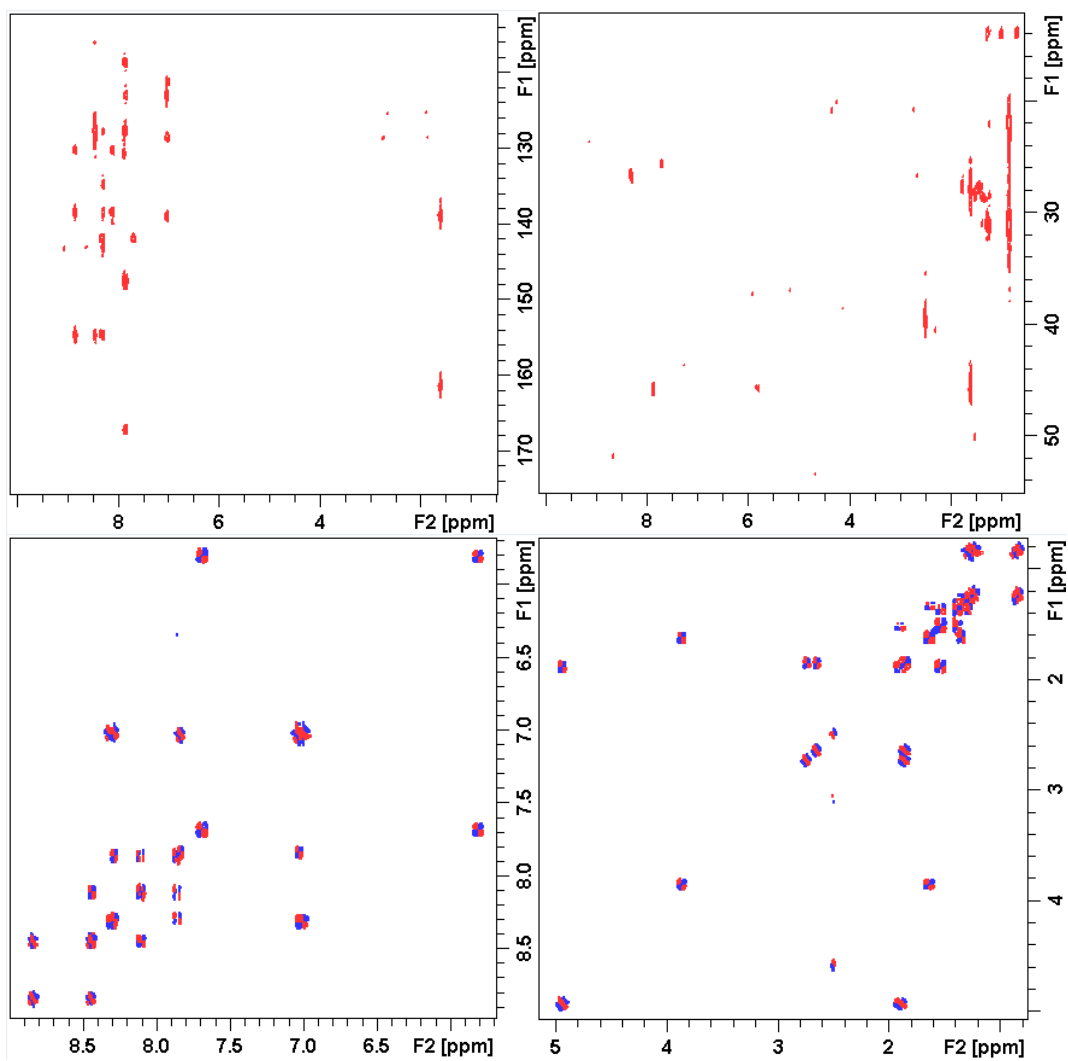

**Hepta3** <sup>1</sup>H, <sup>13</sup>C{<sup>1</sup>H}, HSQC, HMBC and DQF-COSY NMR (DMSO-d<sub>6</sub>)

**1.13 2-(2-(6-(2-(5-carboxy-3,3-dimethyl-1-octylindolin-2-ylidene)ethylidene)-3,4,5,6-tetrahydro-[1,1'-biphenyl]-2-yl)vinyl)-1-octylquinolin-1-ium iodide (Hepta4)**

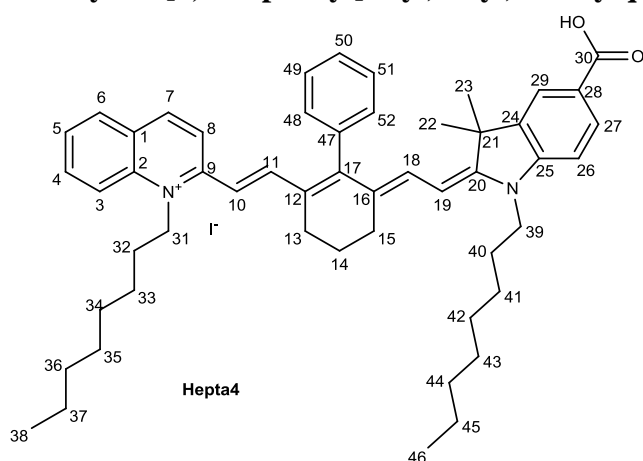

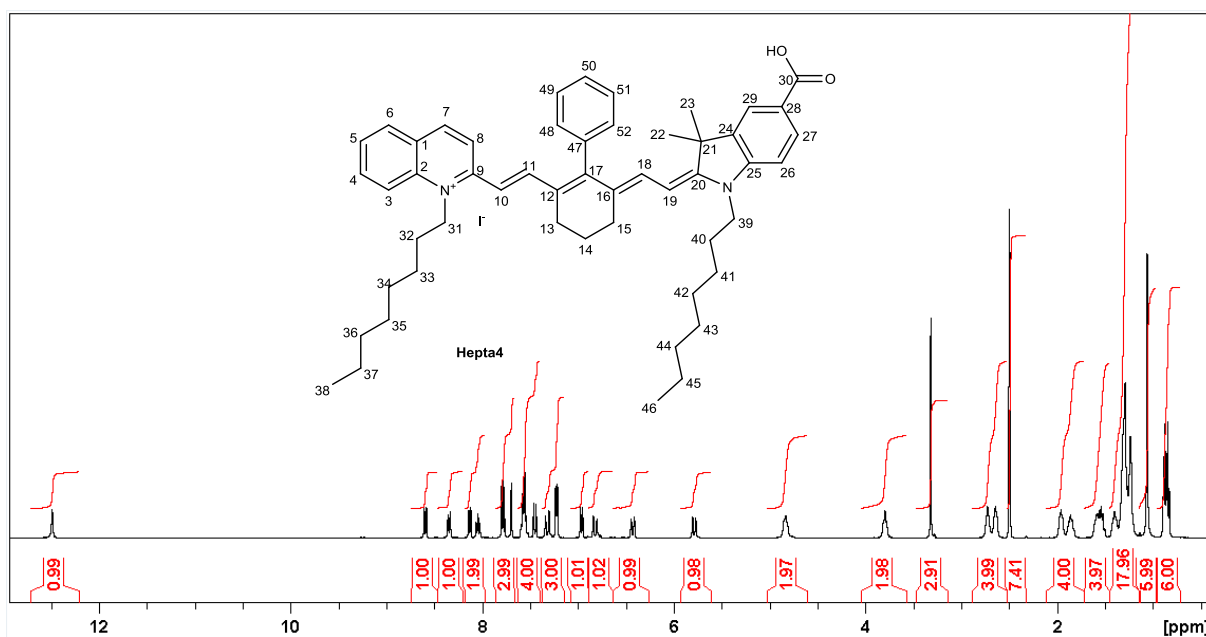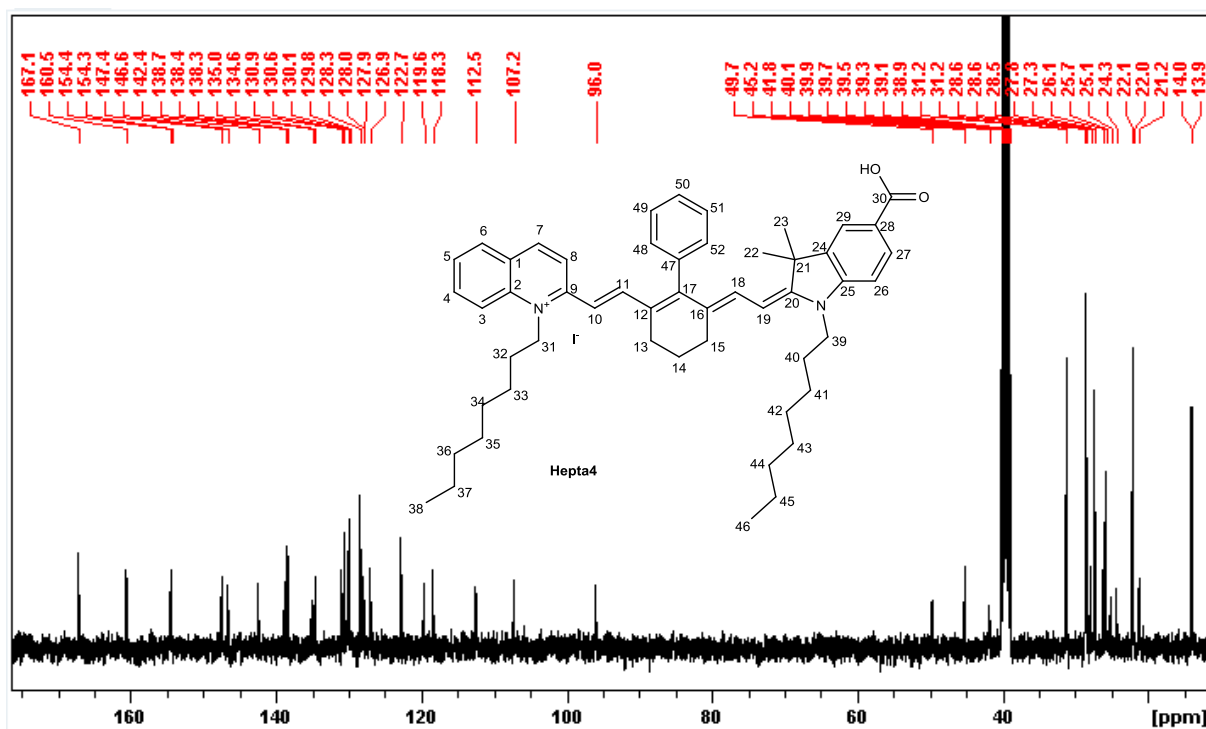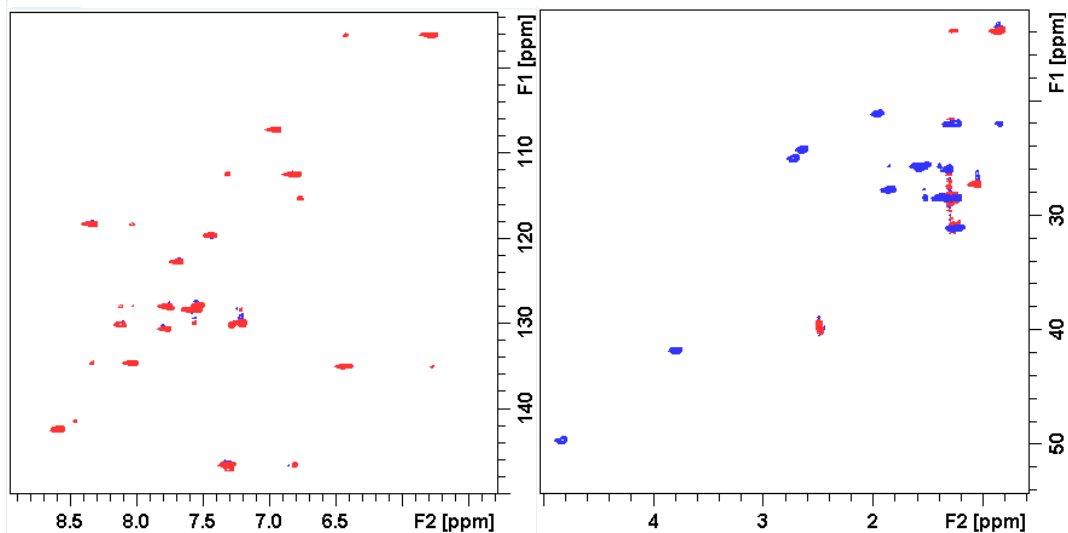

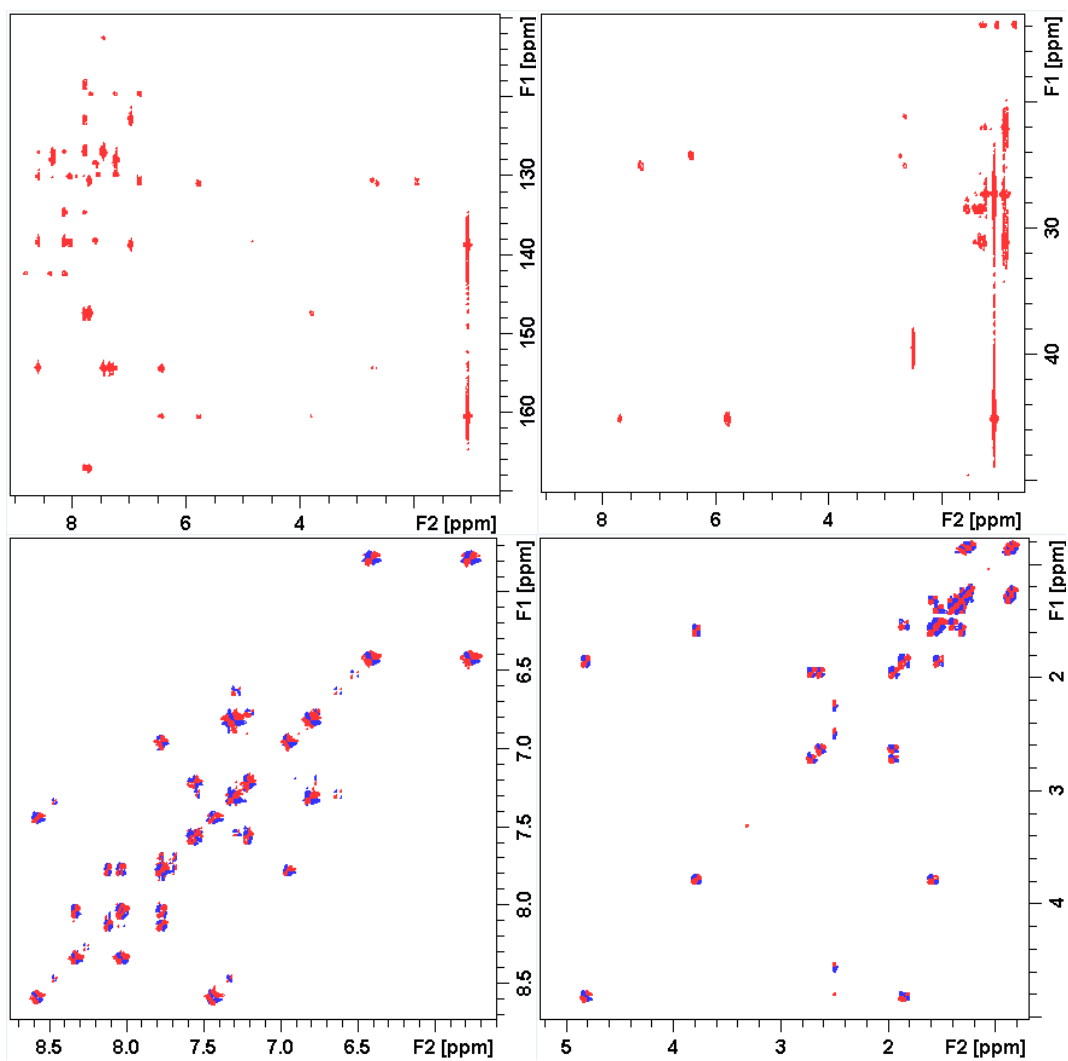

**Hepta4**  $^1\text{H}$ ,  $^{13}\text{C}\{^1\text{H}\}$ , HSQC, HMBC and DQF-COSY NMR ( $\text{DMSO-d}_6$ )

**1.14 4-(2-(3-(2-(5-carboxy-3,3-dimethyl-1-octylindolin-2-ylidene)ethylidene)-2-chlorocyclohex-1-en-1-yl)vinyl)-1-octylquinolin-1-ium perchlorate (Hepta5)**

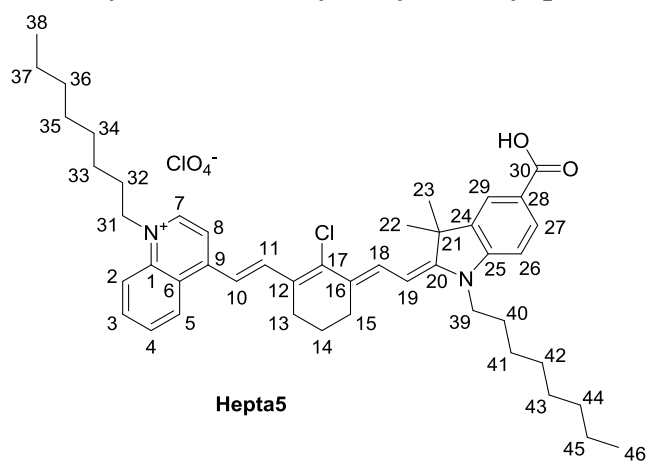

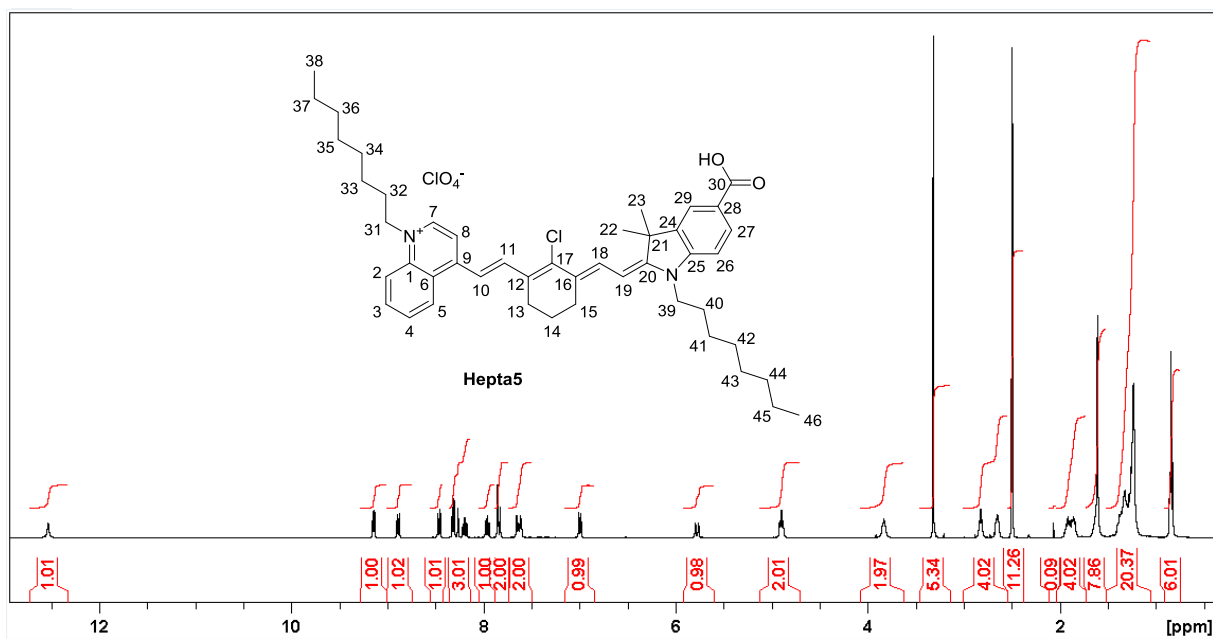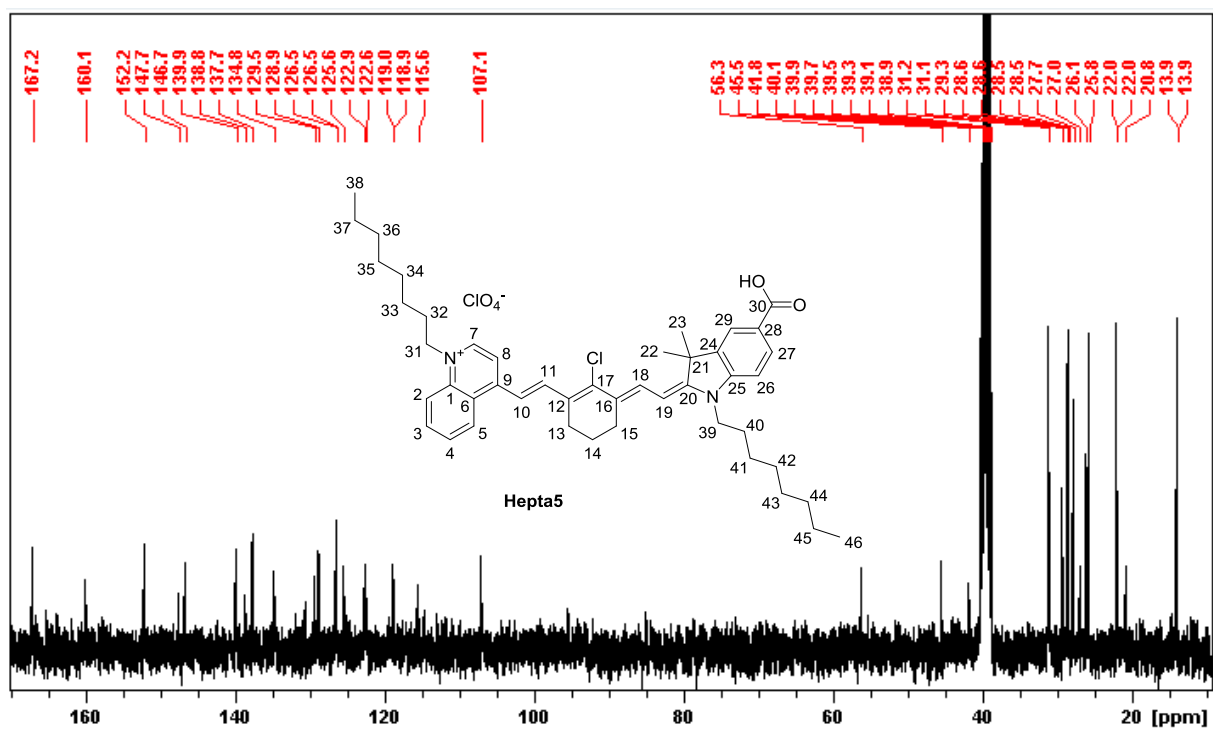



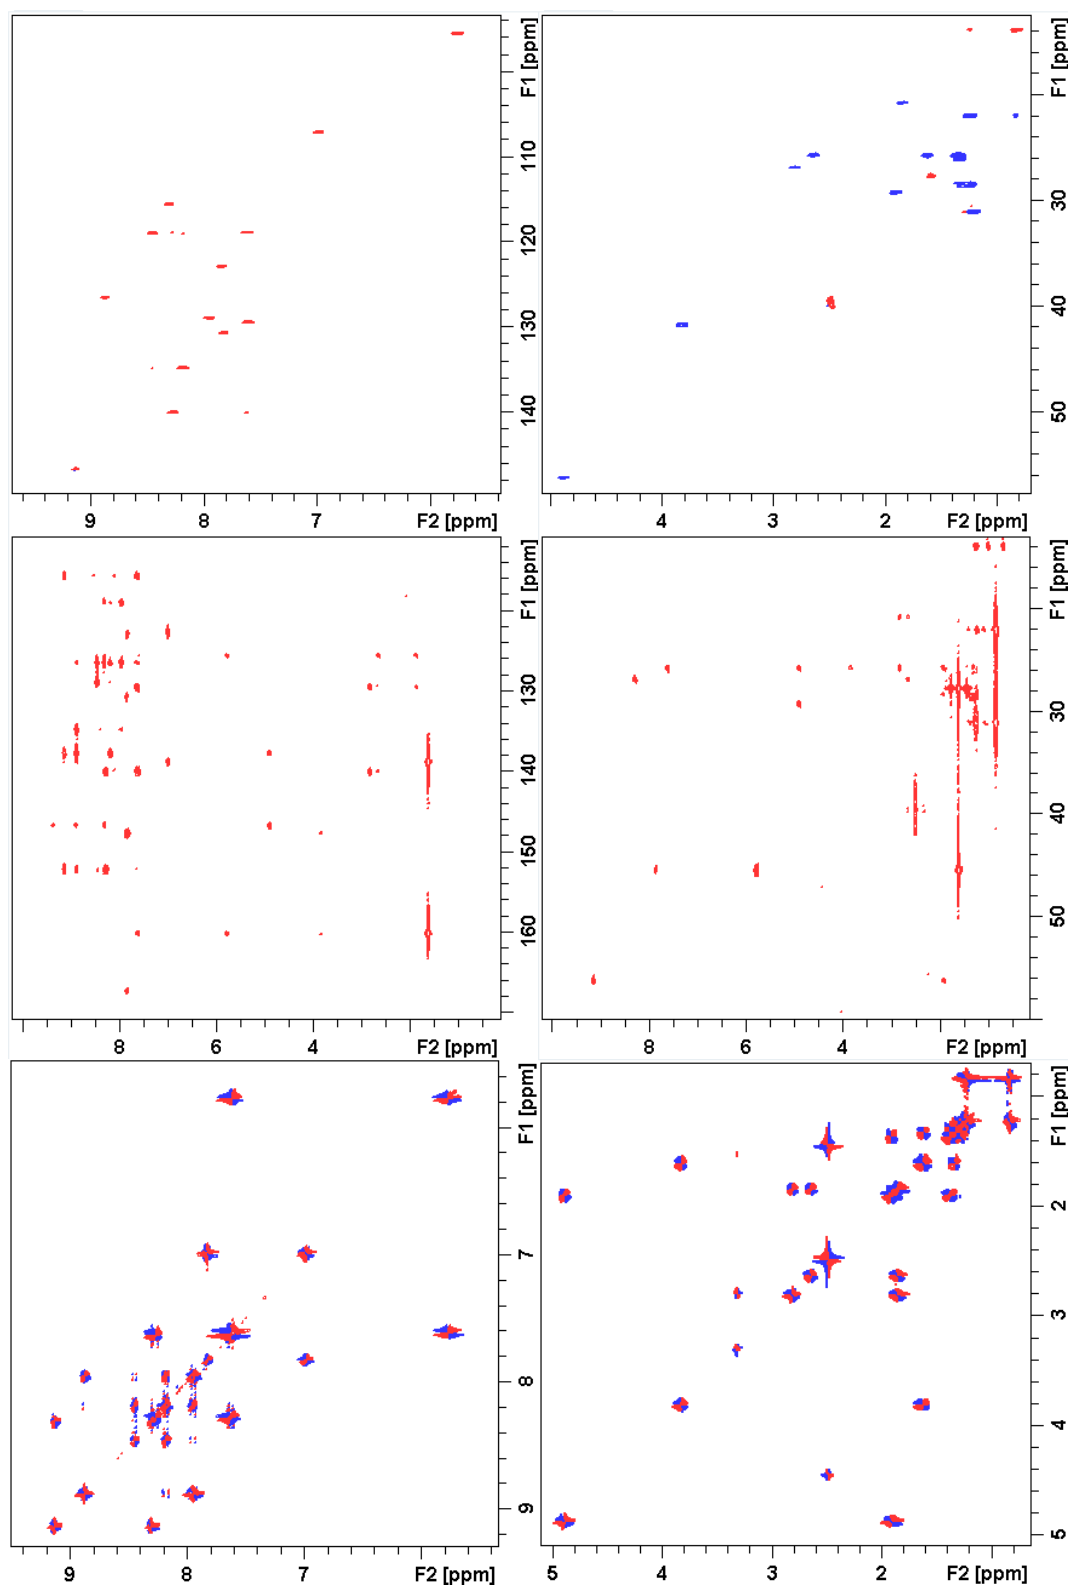

**Hepta5** <sup>1</sup>H, <sup>13</sup>C{<sup>1</sup>H}, HSQC, HMBC and DQF-COSY NMR (DMSO-d<sub>6</sub>)

**1.15 2-(2-(3-(2-(5-carboxy-3,3-dimethyl-1-octylindolin-2-ylidene)ethylidene)-2-chlorocyclohex-1-en-1-yl)vinyl)-3-ethylbenzo[d]thiazol-3-ium iodide (Hepta6)**

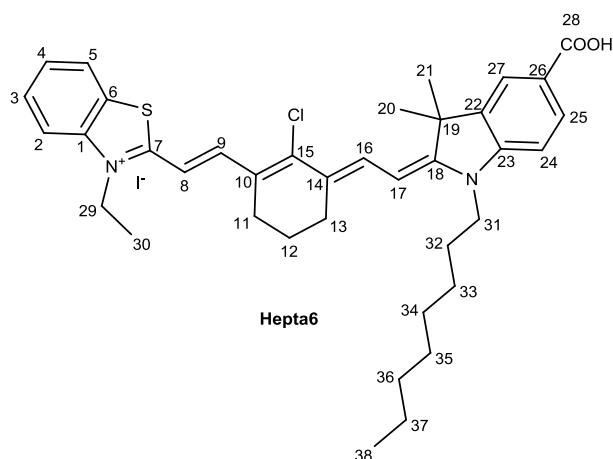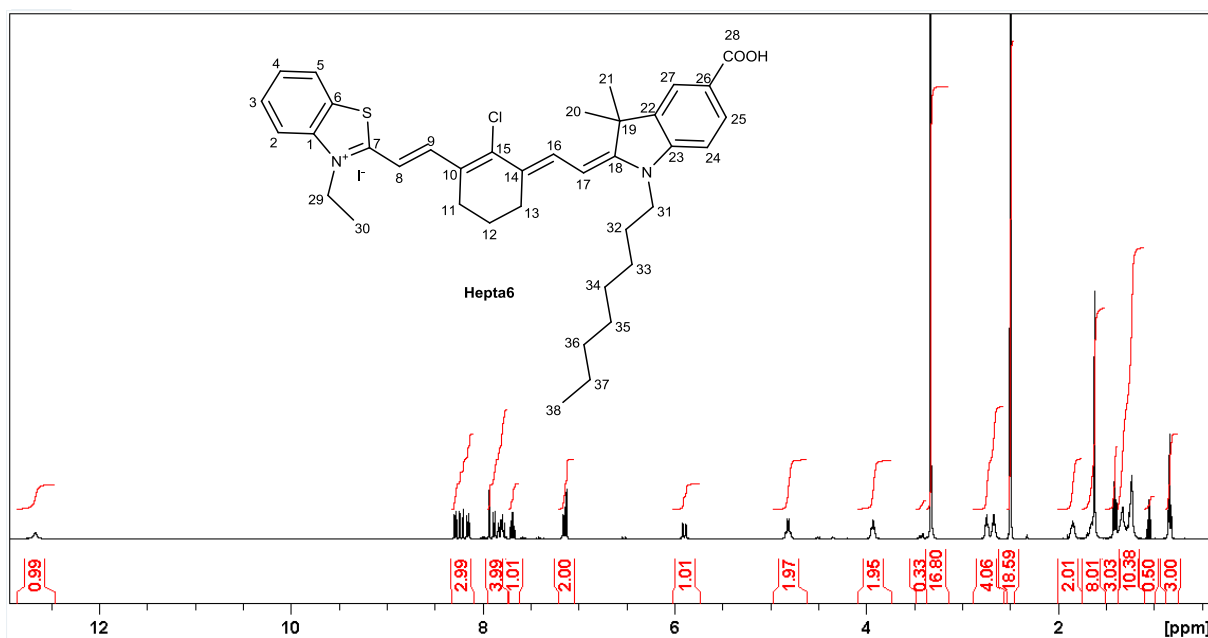

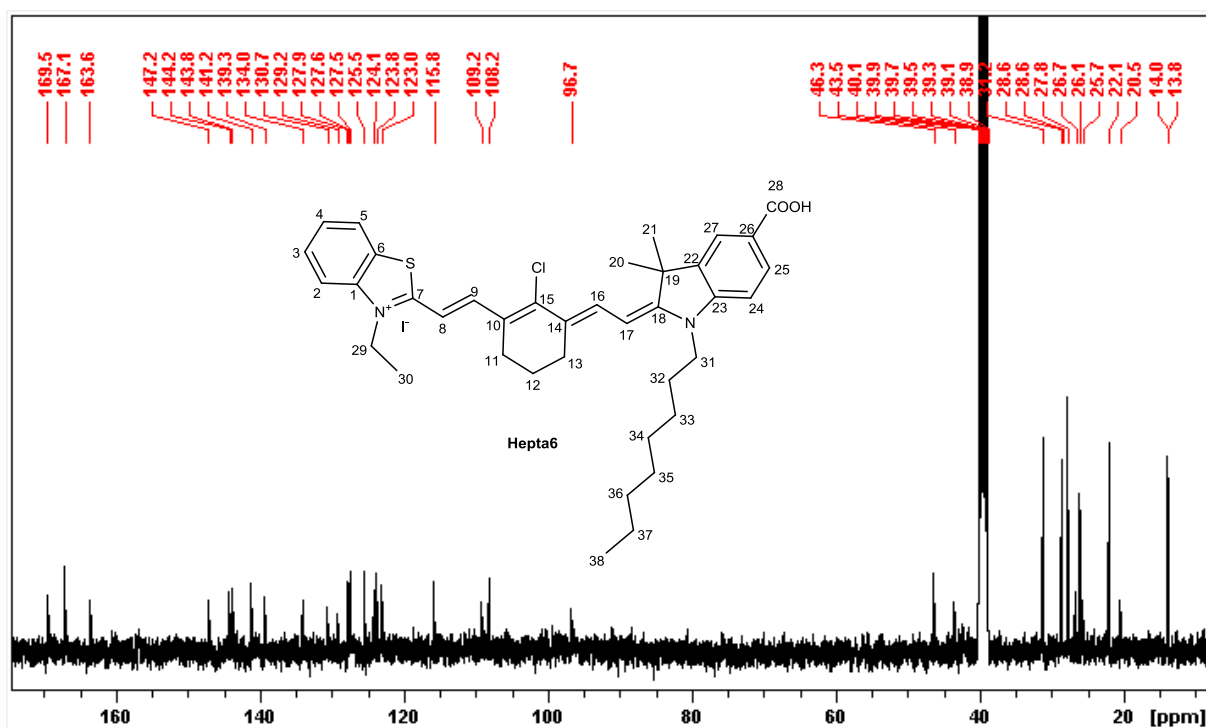

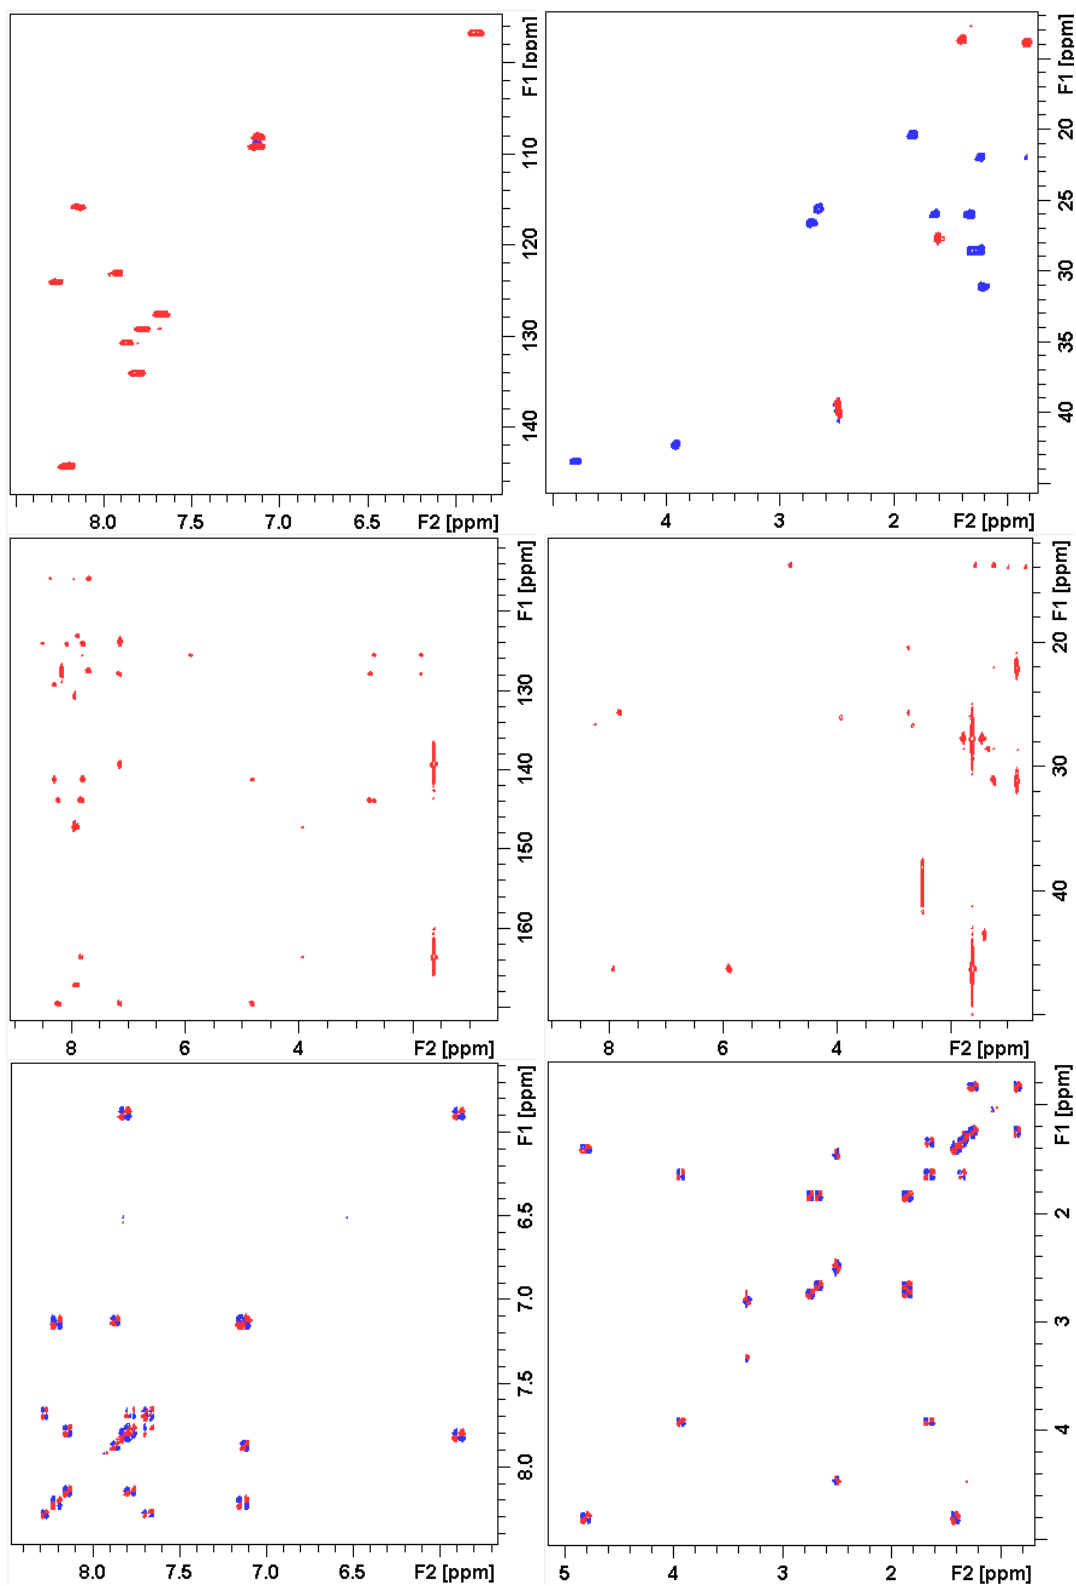

**Hepta6** <sup>1</sup>H, <sup>13</sup>C{<sup>1</sup>H}, HSQC, HMBC and DQF-COSY NMR (DMSO-d<sub>6</sub>)

**1.16 5-carboxy-2-(2-(2-chloro-3-(2-(3-ethyl-1,1-dimethyl-1,3-dihydro-2*H*-benzo[e]indol-2-ylidene)ethylidene)cyclohex-1-en-1-yl)vinyl)-3,3-dimethyl-1-octyl-3*H*-indol-1-ium (Hepta7)**

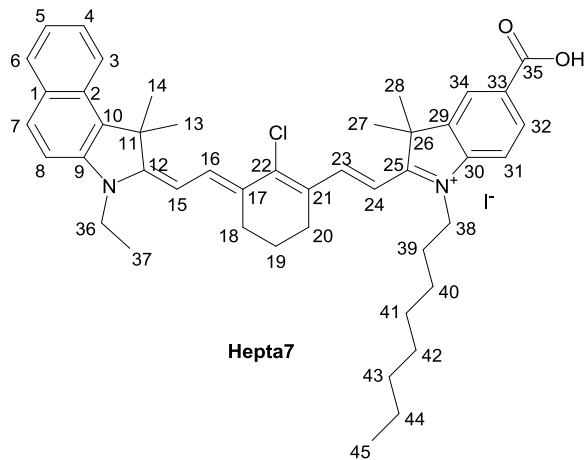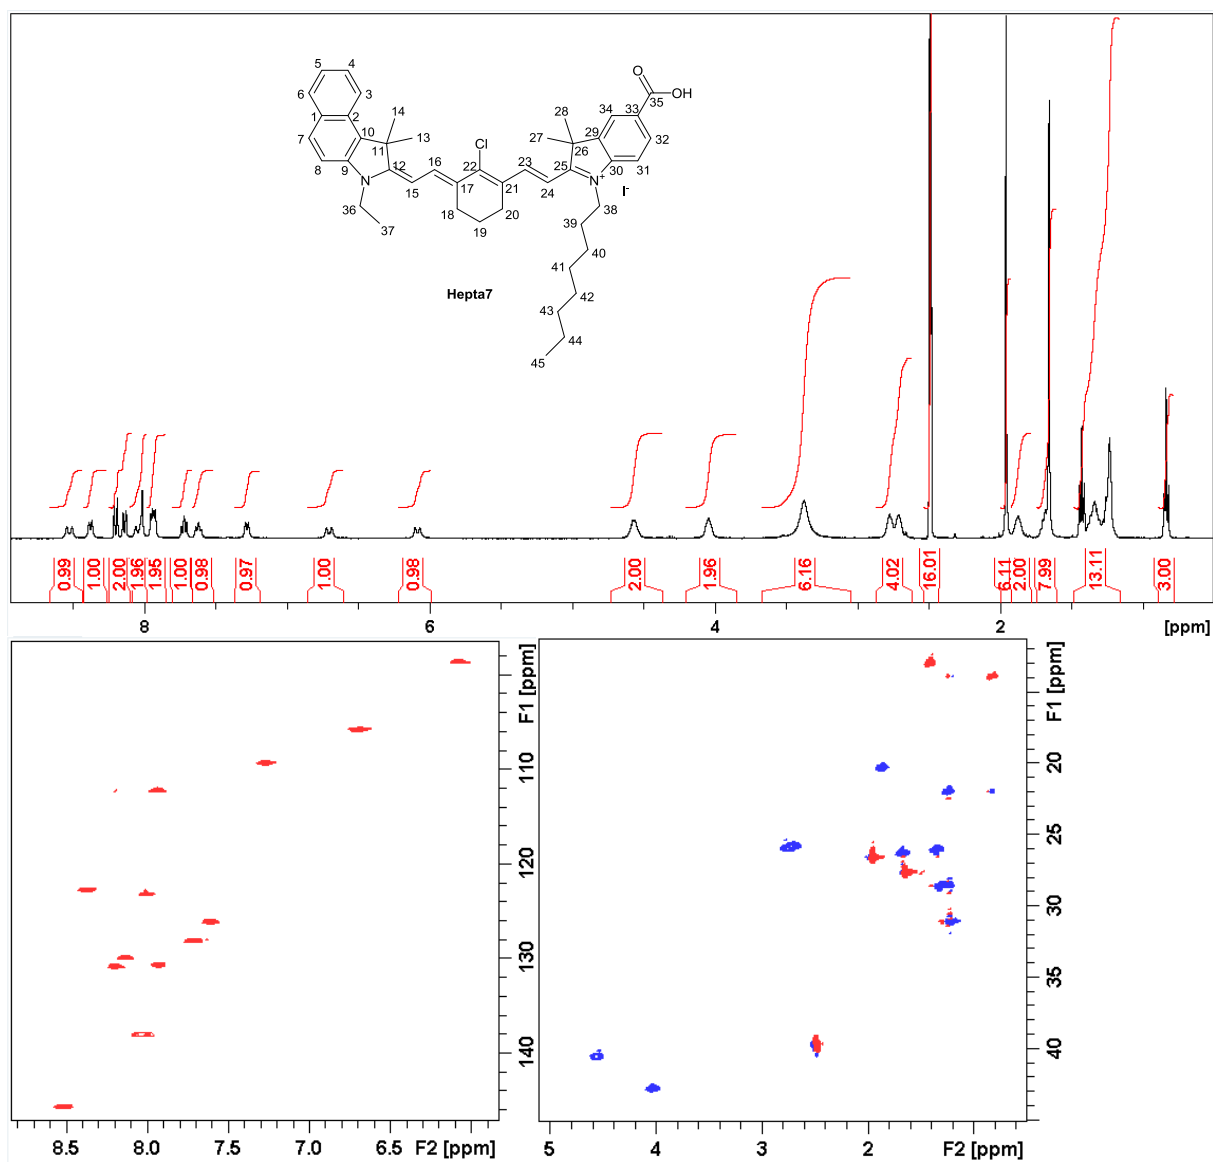

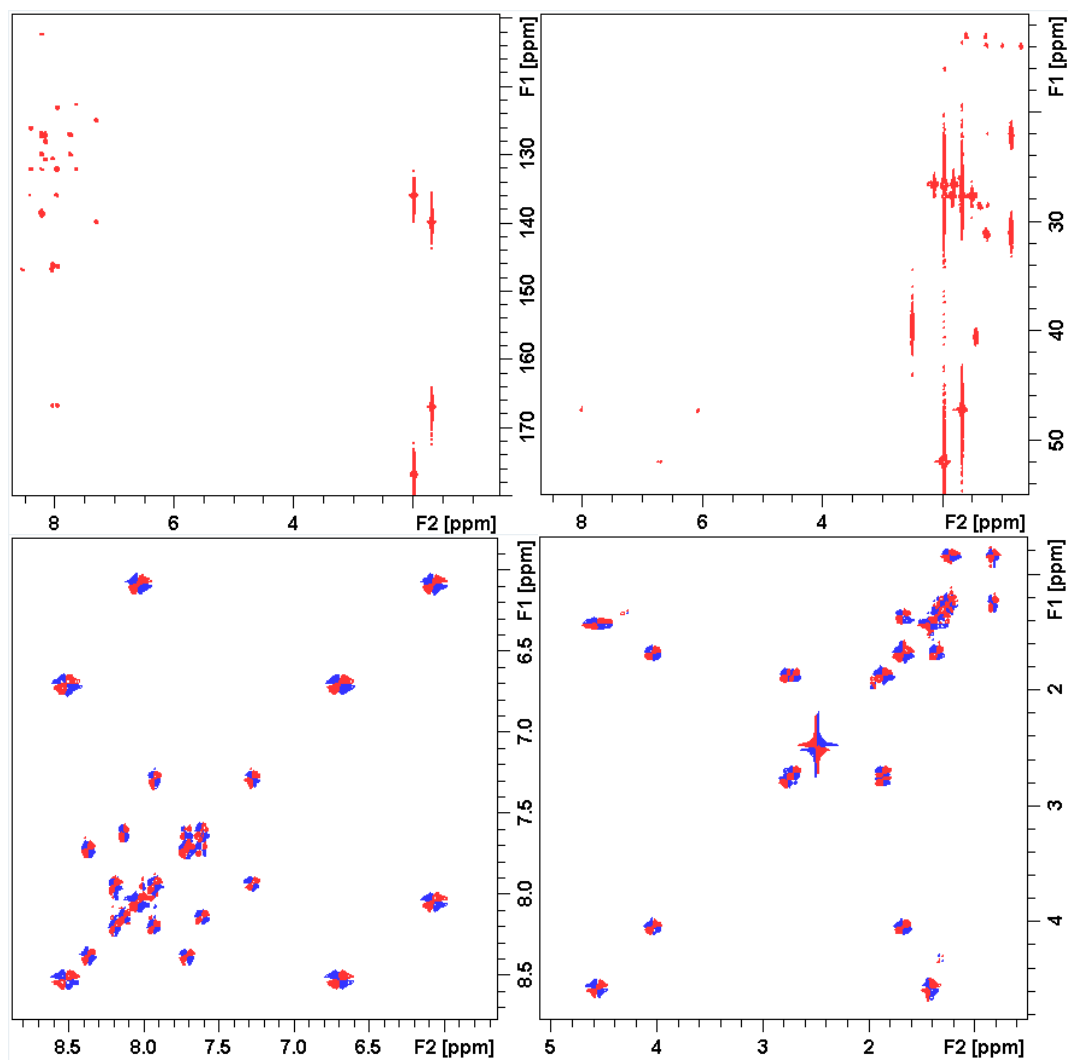

**Hepta7** <sup>1</sup>H, HSQC, HMBC and DQF-COSY NMR (DMSO-d<sub>6</sub>)

## 2 UV-vis spectroscopy

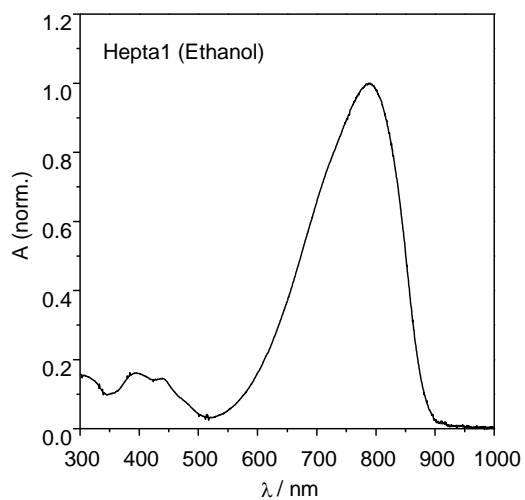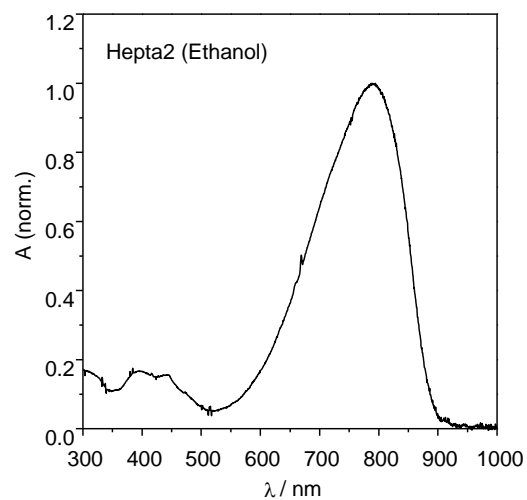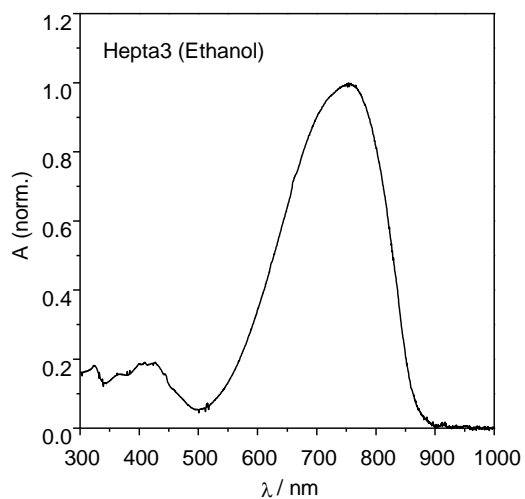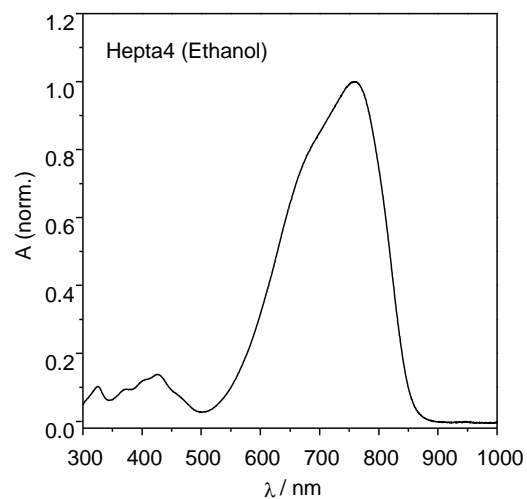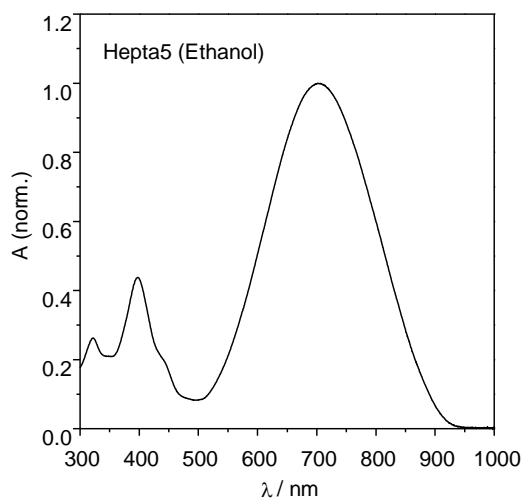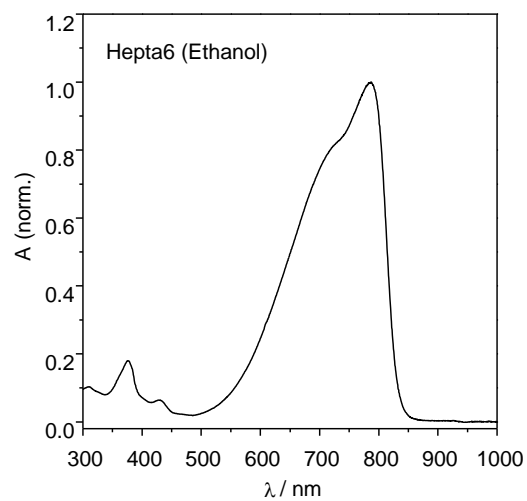

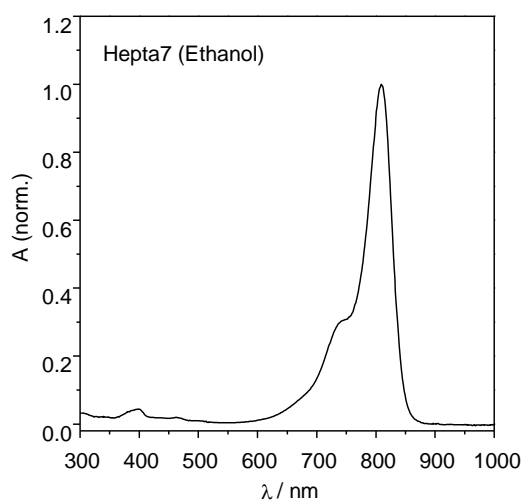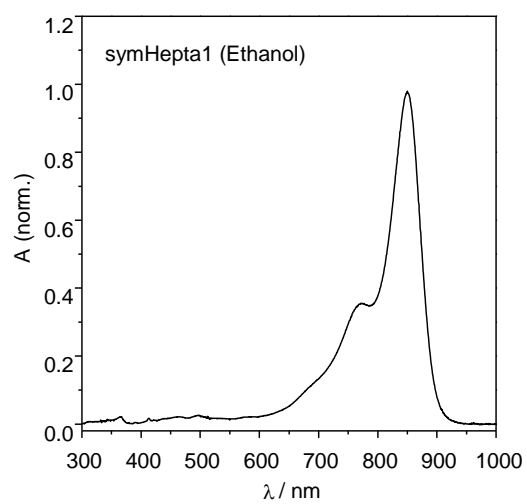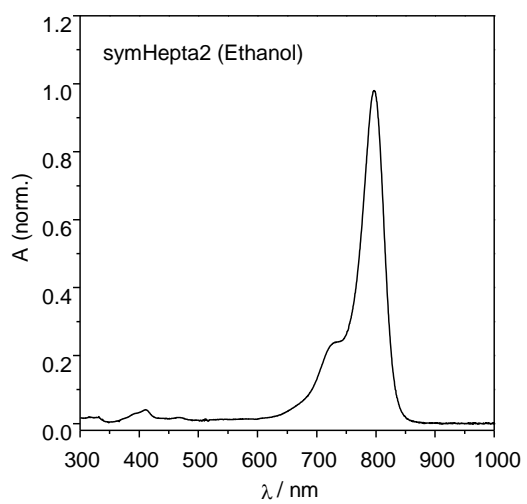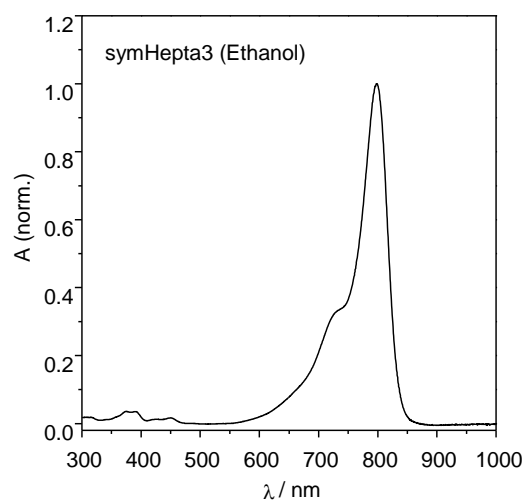



### 3 Cyclic Voltammetry

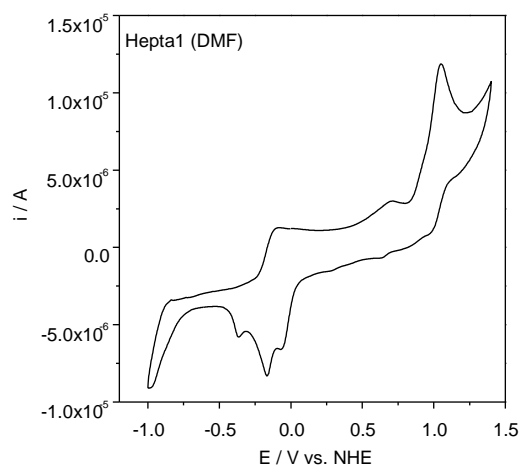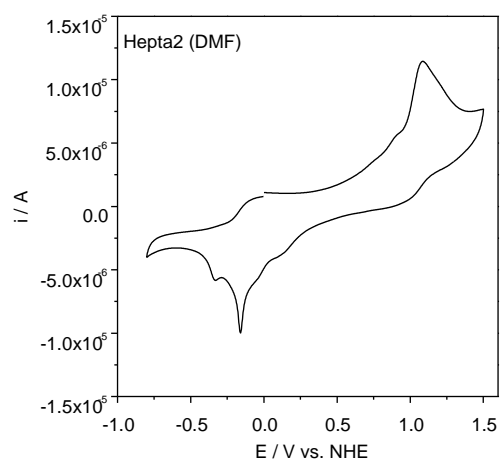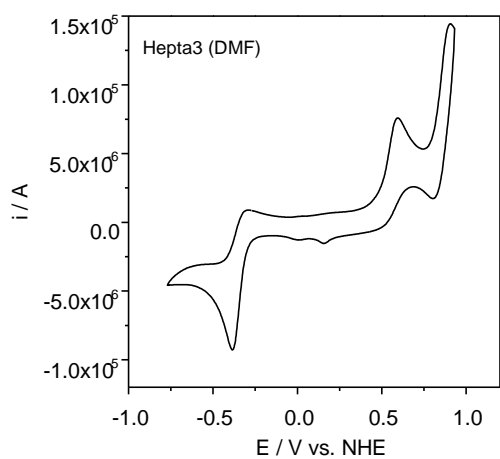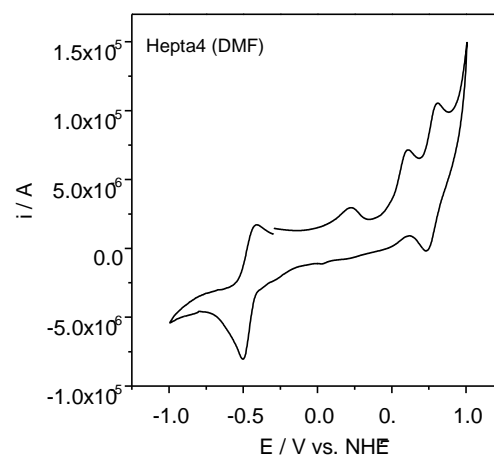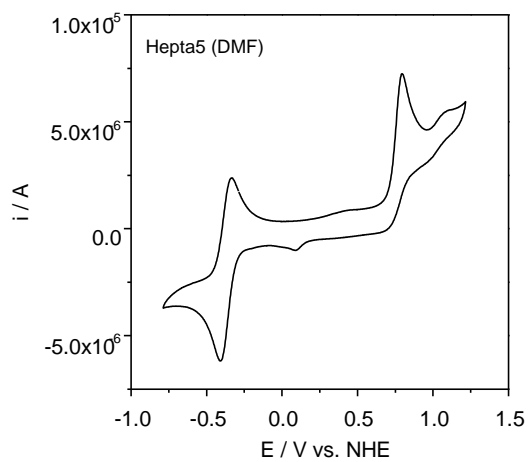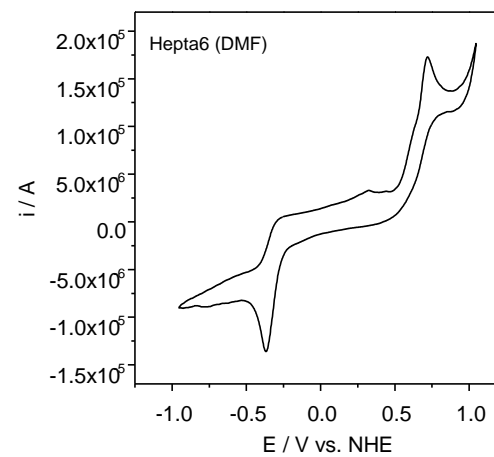

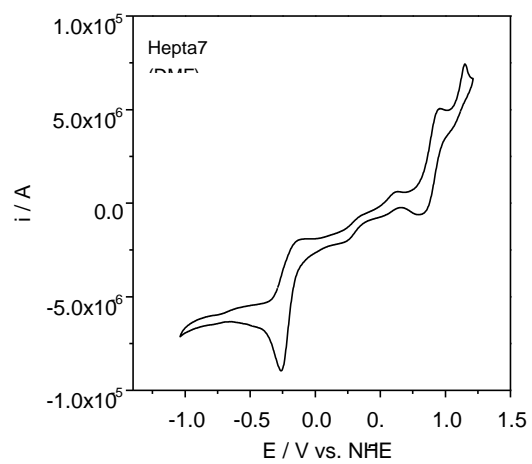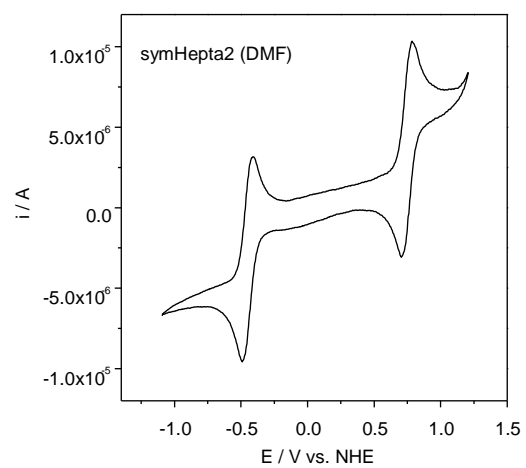

## 4 Molecular Modelling

|        | HOMO                                                                                | LUMO                                                                                 |
|--------|-------------------------------------------------------------------------------------|--------------------------------------------------------------------------------------|
| Hepta1 | 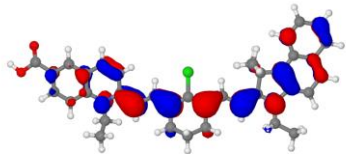   |    |
| Hepta2 |    |    |
| Hepta3 |  |  |
| Hepta4 |  |  |
| Hepta5 |  |  |

|        |                                                                                   |                                                                                    |
|--------|-----------------------------------------------------------------------------------|------------------------------------------------------------------------------------|
| Hepta6 | 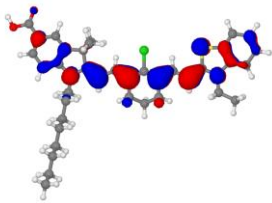 |  |
| Hepta7 |  |  |

## 5 Dye sensitized solar cell preparation

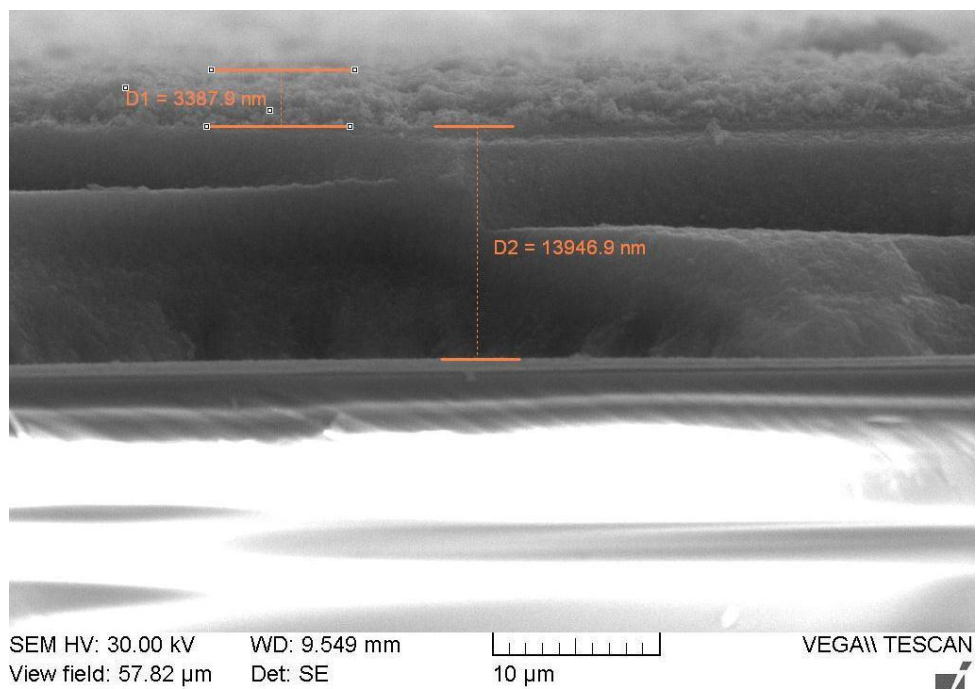

**Figure S2** SEM cross section image of mesoporous titania photo anode.
